# Supplementary material for: New mechanistic insights into the role of water in the dehydration of ethanol into ethylene over ZSM-5 catalysts at low temperature
Source: Royal Society of Chemistry journal article supplement (doi:10.1039/d2gc04437d), 2023-01-01
Supplement: d2gc04437d1.pdf [file d2gc04437d1.pdf]

**New mechanistic insights on the role of water for the dehydration of ethanol into ethylene over  
ZSM-5 catalysts at low temperature**

**L. Ouayloul<sup>1,2</sup>, M. El Doukkali<sup>2,3\*</sup>, M. Jiao<sup>4,5</sup>, F. Dumeignil,<sup>3</sup> I. Agirrezabal-Telleria<sup>1, \*\*</sup>**

<sup>1</sup>*Department of Chemical and Environmental Engineering, University of the Basque Country (UPV/EHU), Bilbao, Spain.*

<sup>2</sup>*Department of Chemistry, University of Sultan Moulay Slimane (USMS), Beni-Mellal, Morocco*

<sup>3</sup>*Univ. Lille, CNRS, Centrale Lille, Univ. Artois, UMR 8181, UCCS, Unité de Catalyse et Chimie du Solide, F-59000 Lille, France.*

<sup>4</sup>*Qingdao Institute of Bioenergy and Bioprocess Technology, Chinese Academy of Sciences, Qingdao 266101, Shandong, China.*

<sup>5</sup>*Shandong Energy Institute, Qingdao 266101, Shandong, China.*

*Corresponding authors:*

*\* [m.eldoukkali@usms.ma](mailto:m.eldoukkali@usms.ma) (M. El Doukkali)*

*\*\* [iker.aguirrezabal@ehu.eus](mailto:iker.aguirrezabal@ehu.eus) (I. Agirrezabal-Telleria)*

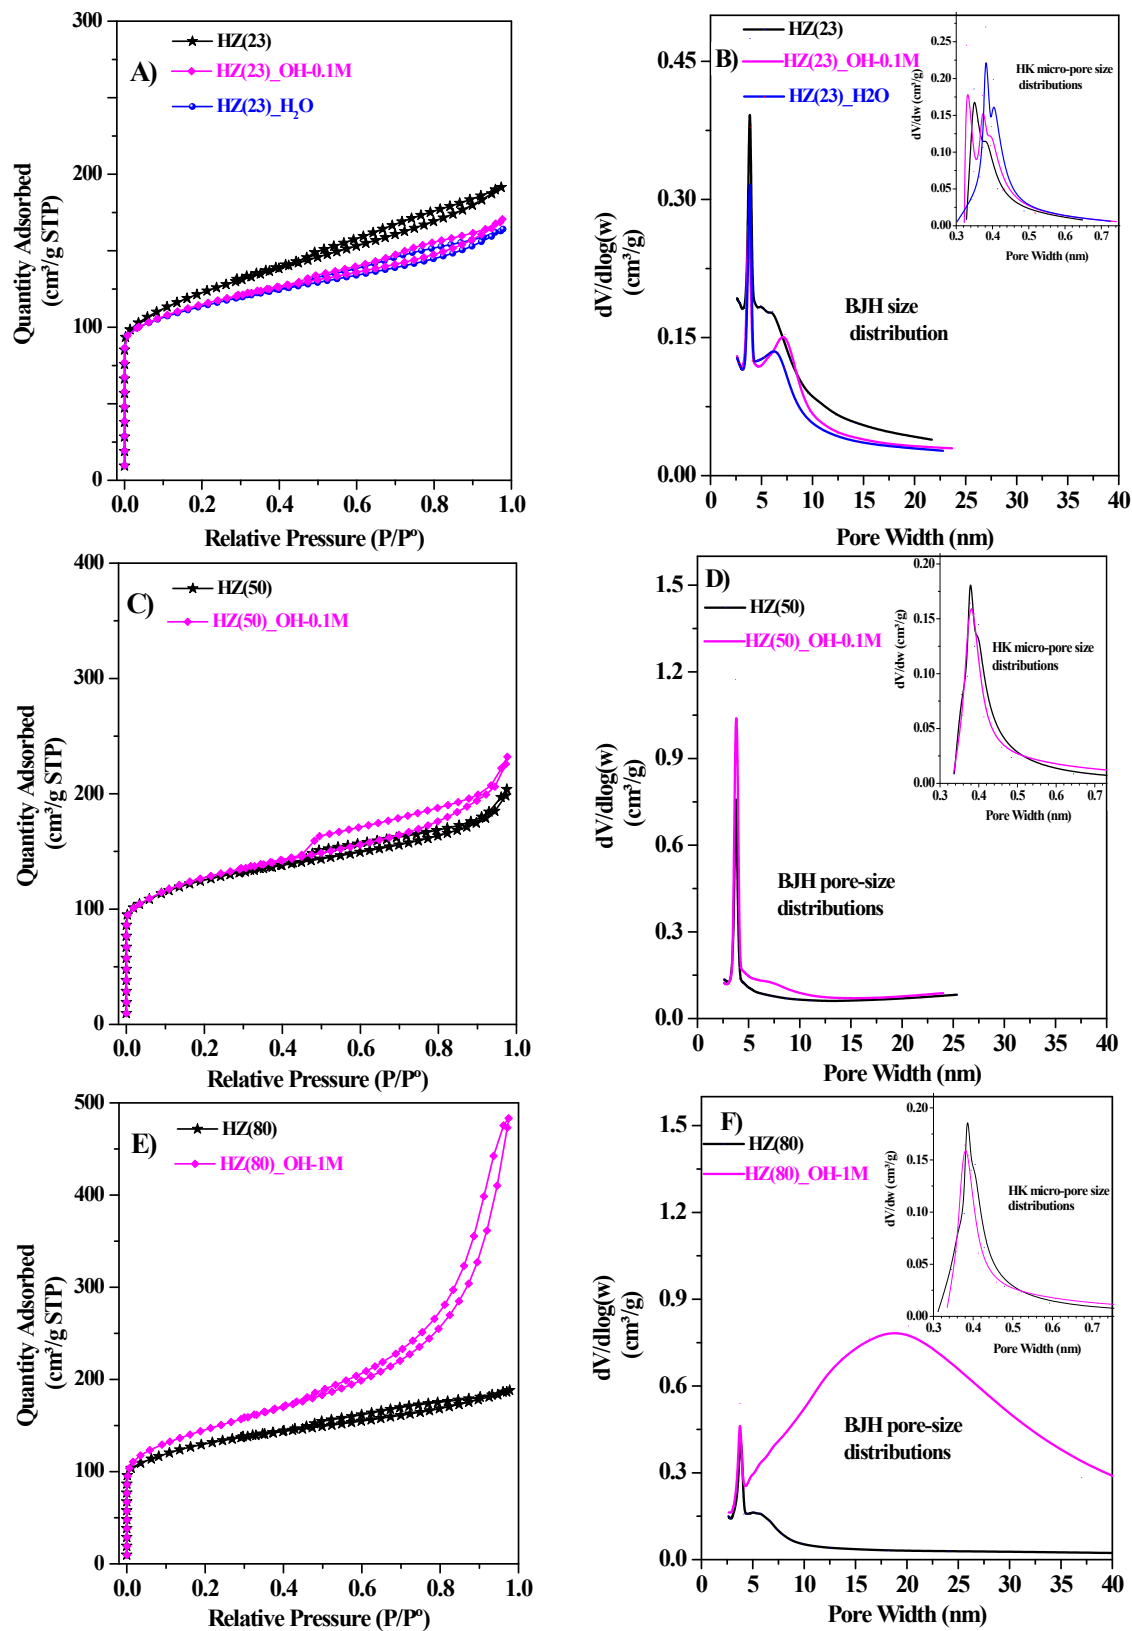

Fig. S1.  $N_2$  physisorption isotherms (A, C and E) and pores-sizes distribution (B, D and F) for parent (black) and NaOH-modified H-ZSM-5 (magenta) and H<sub>2</sub>O-treated H-ZSM-5 (blue) zeolites.

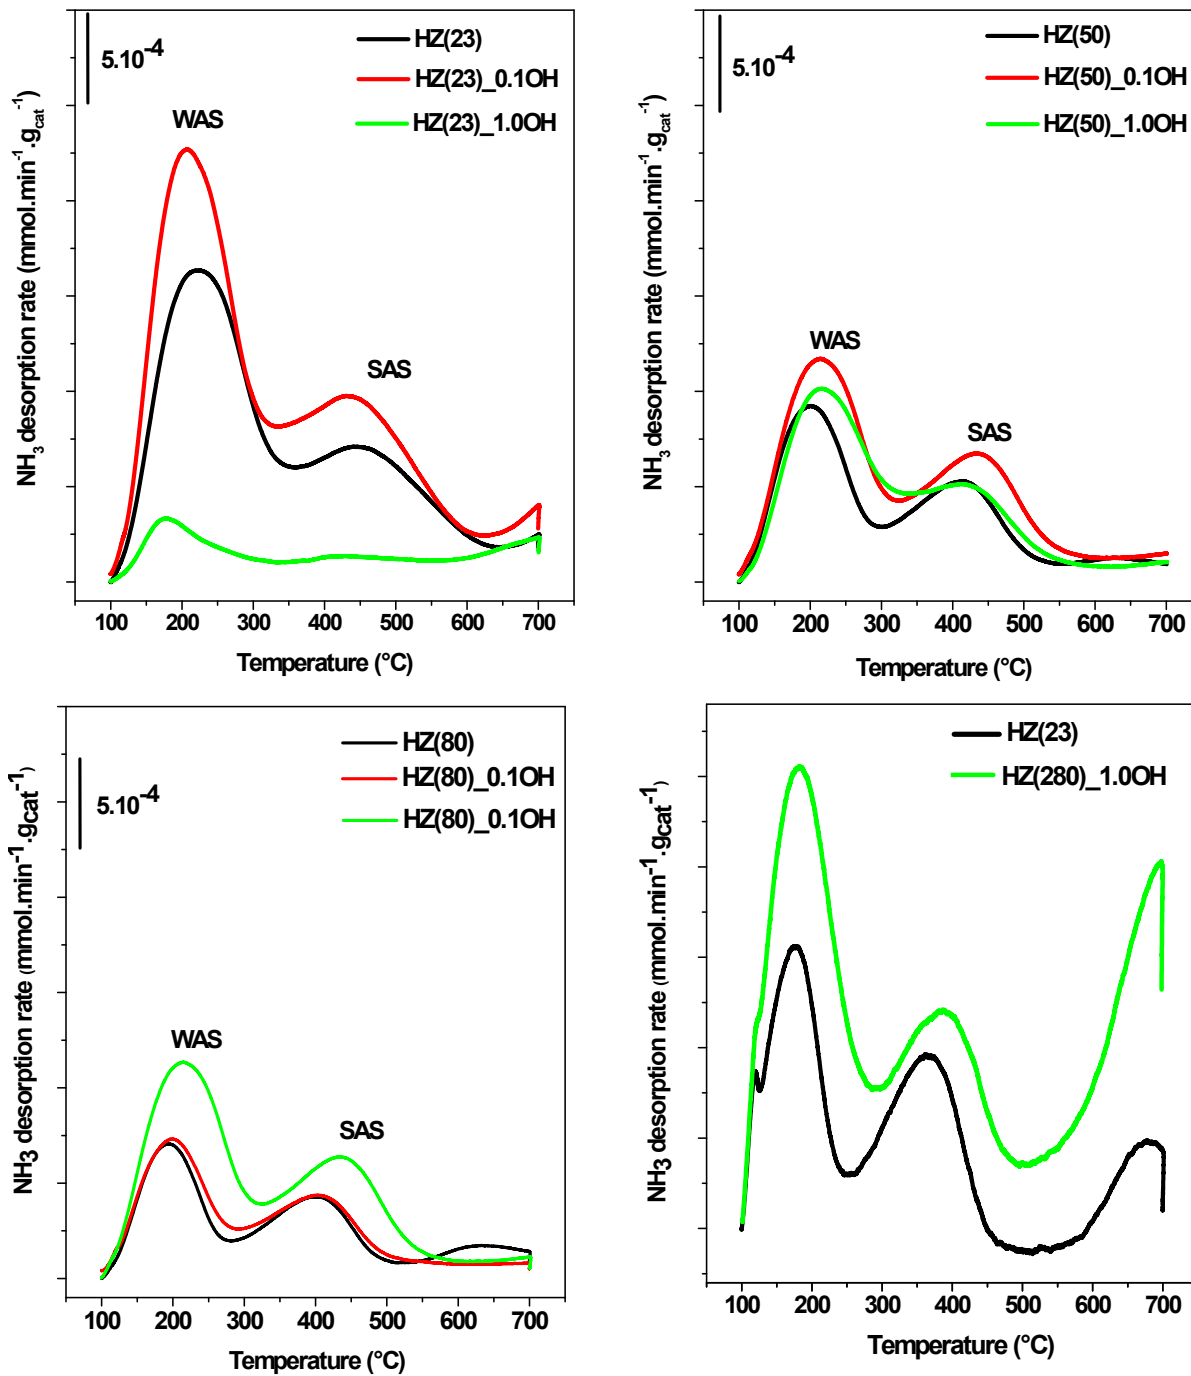

**Fig. S2:**  $\text{NH}_3$ -TPD profiles of parent HZ (23), HZ (50), HZ (80) and HZ (280) zeolites (**black**) and of their counterparts treated in alkaline solution (0.1M red, 1.0M green).

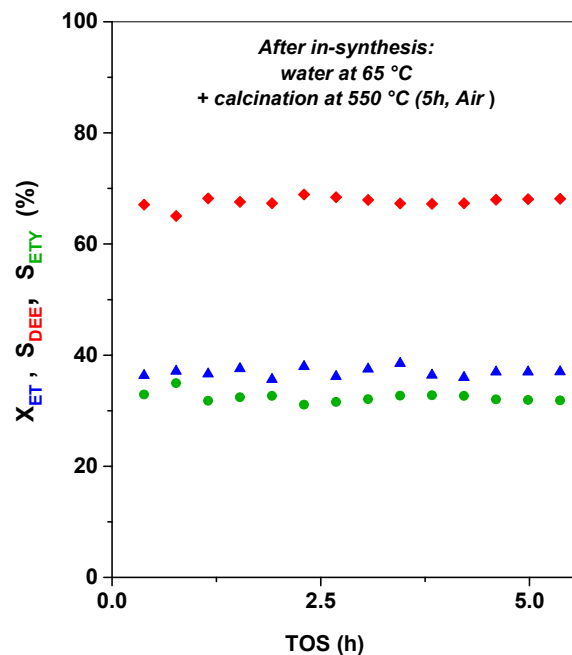

**Fig.S.3.** Evolution of ET conversion (**bleu**) and, ETY (**green**) and DEE (**red**) selectivity as function of TOS for HZ(80) catalyst treated with water at 65 °C (*in-synthesis*) and calcined *ex-situ* at 550 °C under air. Catalytic test data shown for 225 °C, 1 bar and  $WHSV= 35,7 h^{-1}$ .

**Schematic illustration of the optimized structure used in DFT calculations:**

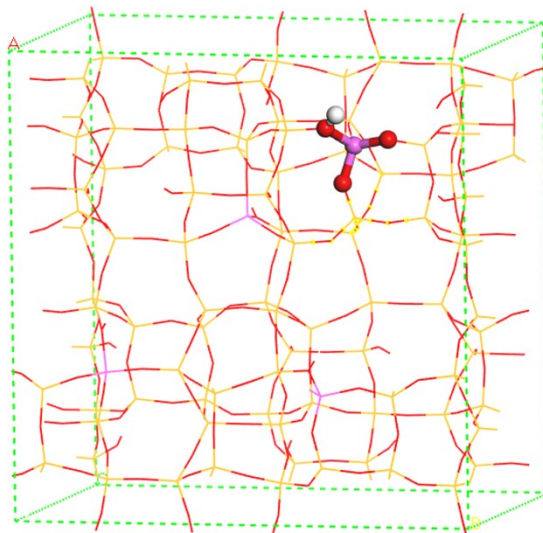

**HZSM-5**

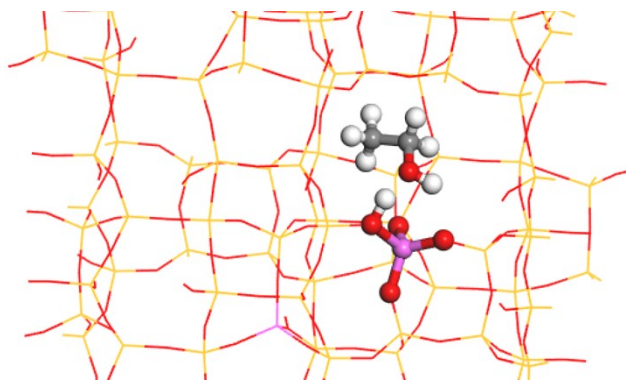

**ET on BAS (T2)**

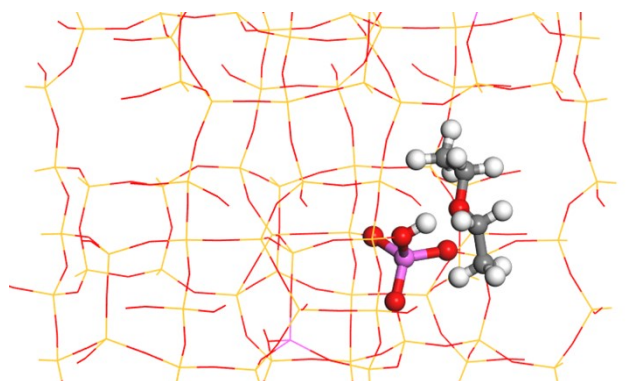

**DEE on BAS (T2)**

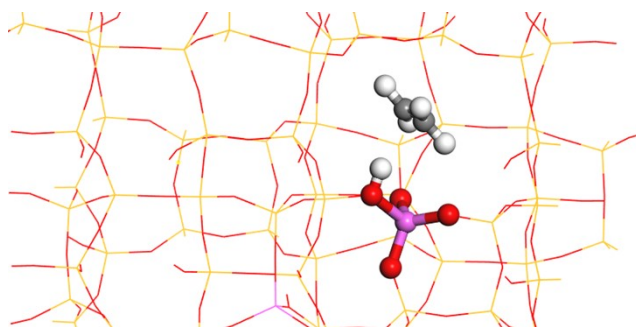

**ETY on BAS (T2)**

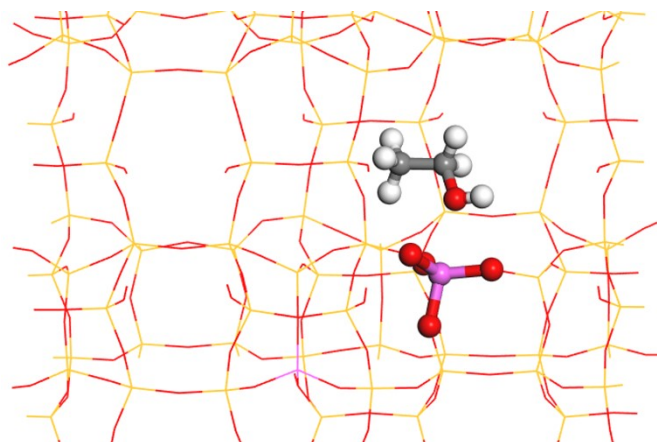

**ET on LAS (T2)**

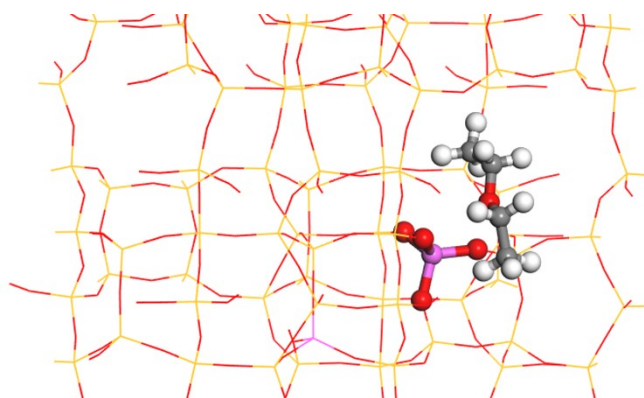

**DEE on LAS (T2)**

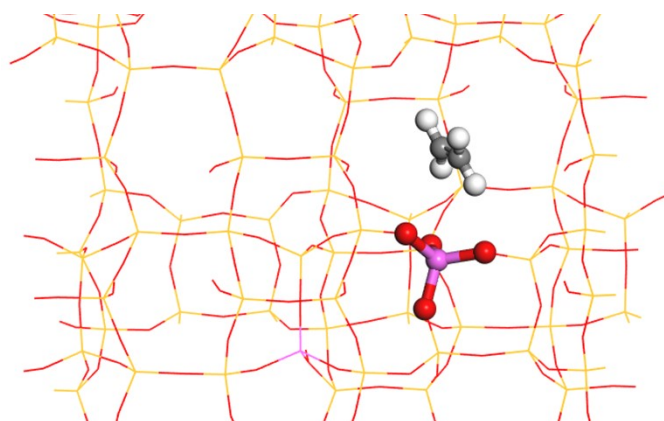

**ETY on LAS (T2)**

# Coordinate Information of the optimized structures

## HZSM-5

0.4235427469739584 0.0587583807816123 0.6616286934659485  
0.3086214198854412 0.0262973498074096 0.8046712474456785  
0.2794887781767610 0.0595041671616210 0.0267238399656862  
0.1227448543946078 0.0619845201982388 0.0285803219072799  
0.0698233489881608 0.0280279539191304 0.8179715727052534  
0.1853784224726849 0.0604127942759660 0.6740419490104991  
0.4232193134708707 0.8263891233662932 0.6756449650250352  
0.3091936527407478 0.8692251772118894 0.8143384577767895  
0.2756313666434895 0.8299803903875284 0.0318953729329227  
0.1206640059630187 0.8249926264909836 0.0295619421537124  
0.0695262307889620 0.8699501613270606 0.8195933765132291  
0.1875658692112731 0.8270627675054861 0.6851849327150010  
0.0779498744878628 0.9410591239099800 0.1655976670215990  
0.1896289794501086 0.9701809241767948 0.3158157423763420  
0.2204909238513333 0.9399655528400347 0.5344331647295022  
0.3773801835323160 0.9368321122628253 0.5303675314513515  
0.4274709220846485 0.9688089180720195 0.3174647454768400  
0.3116429757634736 0.9424420641083394 0.1757890545965961  
0.0786211334777073 0.1723799412293824 0.1752952484305585  
0.1899838153286006 0.1284202653836962 0.3200186093639864  
0.2218672708562552 0.1737462843272626 0.5342907166514037  
0.3758737508043291 0.1739244815878485 0.5281731347380987  
0.4322394771277441 0.1259292228590182 0.3229963327348657  
0.5742650037839029 0.5635093187426773 0.3368185783923262  
0.6891185474040129 0.5287276942386488 0.1900066164513735  
0.7215865483786559 0.5647863358492997 0.9709526496595534  
0.8788630792929742 0.5652612262139561 0.9714664815907245  
0.9314141674605327 0.5232418149447131 0.1790411652561201  
0.8153705376577685 0.5524258330339832 0.3220902564197487  
0.5730437118775391 0.3248511603147791 0.3241457808405673  
0.6906544369659665 0.3699677760254633 0.1890964321534405  
0.7260029405825378 0.3266848059643493 0.9712137342275604  
0.8796497627805782 0.3245138745356009 0.9701654443110054  
0.9299286733513409 0.3660443368688708 0.1803053396301718  
0.8140801885475446 0.3287985221817042 0.3227619468486652  
0.9206216161462958 0.4414724316840739 0.8368717052560384  
0.8046852960671895 0.4679485312763849 0.6949365625012101  
0.7811667981153962 0.4382721875155258 0.4710111531780909  
0.5700871216058259 0.4730014050363451 0.6955775655945425  
0.6853837660426142 0.4410360325961192 0.8343132114685311  
0.9253922131307911 0.6727708875514471 0.8264089569432820  
0.8098758883679813 0.6257979862176836 0.6904051107235475  
0.6201788009933978 0.6747721477617135 0.4653180335970578  
0.5711676914180658 0.6298788449471325 0.6783659637791102  
0.6870169669926351 0.6732182210576032 0.8188491747529686  
0.5771137133652723 0.9436675591154691 0.3357391821667825  
0.6922011010014506 0.9713141202961586 0.1874453422399293

0.7204486323229022 0.9379689337707867 0.9674553006861619  
0.8776817976138018 0.9365087785117984 0.9702508936229589  
0.9302338446888315 0.9729229207430561 0.1816928266111422  
0.8143976766240697 0.9425290560425266 0.3246543851292047  
0.5793526882453323 0.1699084006212055 0.3280625090136946  
0.6934712790480985 0.1297925346677972 0.1846761810342192  
0.7253119142413386 0.1733704195788828 0.9683226842508027  
0.8792477425291115 0.1732776182688295 0.9696273987020528  
0.9302586861035964 0.1314091666033167 0.1816903285083687  
0.8137292314341467 0.1742304156174425 0.3202945658505061  
0.9223403236400547 0.0577106270601072 0.8337357918502823  
0.8071418584272921 0.0308657901377406 0.6898063233986280  
0.7811873951222624 0.0624171039944529 0.4670237671050932  
0.6243645567868717 0.0624255121375508 0.4732719494395465  
0.5714846900787084 0.0301729221498085 0.6860150830467229  
0.6861491169488763 0.0603192260997636 0.8280067124328225  
0.9228980266767127 0.8280662814189661 0.8245450175257008  
0.8077920541536169 0.8722253803990605 0.6858103695521959  
0.7770239226738990 0.8300493372878144 0.4678958772594005  
0.6229737765224659 0.8290823255470859 0.4707264213090566  
0.5696409657668023 0.8718857098179920 0.6825803032850731  
0.6859630894963166 0.8271699231538125 0.8179571304327837  
0.4223253816428226 0.4410011006197689 0.6578929920638539  
0.3074014467971231 0.4702387680872089 0.8013108892846180  
0.2770123605017553 0.4403554683169205 0.0228183370014894  
0.1204216553462340 0.4364355506540618 0.0249568484685647  
0.0676247519005359 0.4720769850292520 0.8146746259945503  
0.1838696215892498 0.4405158455445347 0.6716845644657496  
0.4250453737642004 0.6723049008280763 0.6705169570351781  
0.3099903018715224 0.6275330291460909 0.8086965727657877  
0.1207371725958994 0.6718589058616025 0.0342413536572980  
0.0720409968541472 0.6303295005932104 0.8198200547043279  
0.1880632167270529 0.6745328077875538 0.6813141939851575  
0.0777383664460807 0.5575319166209775 0.1643796609426474  
0.1903663289337158 0.5308692197183463 0.3135661102684681  
0.2202280553682222 0.5628405490688801 0.5338180939364029  
0.3775041471962913 0.5638467268912396 0.5266585597623722  
0.4315818124996207 0.5255057269679823 0.3177790587021765  
0.3133495839818049 0.5524591576306092 0.1773854315541445  
0.0773177345852936 0.3268828471281872 0.1736788592194890  
0.1911824983295500 0.3721233037639520 0.3126655748605760  
0.2235737448891161 0.3279221344096798 0.5301714604061444  
0.3772123992918237 0.3259210426692718 0.5240239960654371  
0.4300256280069895 0.3695364005398326 0.3142079466720424  
0.3133147539720323 0.3327968248057374 0.1749903275605638  
0.3732095995494069 0.0565837466241742 0.7525641338577824  
0.3092593059288180 0.0470281400157283 0.9179828504196337  
0.2005466752851259 0.0546453283596068 0.0207579664143979  
0.0909977290930783 0.0616843427017075 0.9203779576814535  
0.1160302860316838 0.0536454574133193 0.7296970724937911  
0.2438933719611755 0.0549161037765770 0.7526777822772546  
0.3743100676144036 0.8361826720421139 0.7678694933141035  
0.3087866871828961 0.8565542034780416 0.9307158733621405  
0.1973902935116456 0.8435374590707688 0.0252917202015667

0.0887481347378432 0.8361170929078857 0.9224949035566438 0.8116669087442780 0.3720842550464074 0.4223912150224770  
0.1176272267676455 0.8444659189950148 0.7336341686725603 0.0049282407486140 0.5438192592352611 0.2067454091319860  
0.2446300117861744 0.8370657414733055 0.7657245777016640 0.0035242039820807 0.3451393078967010 0.2068646915533666  
0.3100310094381063 0.9471989516427697 0.7909298956634080 0.8670119674634197 0.4367535110625260 0.7503531457500409  
0.0751567047393390 0.9489780665766350 0.8288415884583249 0.8075934869790135 0.4440937955035448 0.5823428690938556  
0.4154241337219260 0.1279220545827358 0.6034035595807292 0.7038929522741484 0.4370833963439181 0.4668697704842190  
0.4110356758981077 0.9983937580081591 0.5863340578858521 0.6075997622926427 0.4334467251006742 0.6002935168116192  
0.3979585725952594 0.8685286308567954 0.5823090642333576 0.6121644221289049 0.4490243749750969 0.7884223294930335  
0.1883942801203059 0.1320560756856843 0.6219744459367634 0.7361703629086114 0.4401097298999244 0.7422122947955460  
0.1916813116018364 0.0033108745781483 0.5918030635585494 0.8768114711084248 0.6521145033916514 0.7392359369589598  
0.1996411462093997 0.8729647307341792 0.5901371963772765 0.8095933746650745 0.6432739984088919 0.5771541518879768  
0.9956678110612190 0.0492253507500149 0.7920154871983562 0.6941194356421339 0.6501617915129809 0.4606379720364525  
0.9957704983405964 0.8491512773936492 0.7910620746567227 0.5902071517109826 0.6609810875201773 0.5742558924045053  
0.1269136534061491 0.9412667249643284 0.2582865066822890 0.6193060143284271 0.6544027132881735 0.7643468447007087  
0.1912929108227878 0.9383830610529246 0.4247452728202205 0.7479631458477040 0.6586268631336446 0.7471113175510813  
0.2993117622192001 0.9455449170543926 0.5309070702599137 0.8053463921672063 0.5465831713397065 0.7074129713891769  
0.4039186963897355 0.9350098672671130 0.4186461683339410 0.5762733367911669 0.5496374067307814 0.6727268577491332  
0.3830187148568411 0.9446729809497899 0.2275459732600445 0.9194088610615255 0.3732032773884062 0.8980515207231838  
0.2563088894026921 0.9497031694130931 0.2599268939130511 0.9031576364783130 0.5024178815473573 0.9088457582321862  
0.1252976443549797 0.1577573654478120 0.2674414259117012 0.9058842095937308 0.6331944587216557 0.9257922383956432  
0.1882032596300656 0.1557133200945425 0.4316939920981874 0.6880316187405494 0.3715003650463266 0.8911808983273731  
0.2993063534901664 0.1559584902181588 0.5296653627941326 0.6996831097609989 0.5005951457025350 0.9085645676954918  
0.4039359723661795 0.1627020160281535 0.4174110745402039 0.6931485525732823 0.6301770979705920 0.9189926280753113  
0.3927050127192518 0.1566056446469285 0.2233555443627823 0.4962587641003042 0.4477252346548283 0.701122322299339  
0.2560222436326251 0.1506585697568615 0.2666028060384809 0.4970139017240962 0.6492387933858987 0.7057891888315907  
0.1838087964416548 0.0490144943209657 0.3228392772490129 0.6258980245627644 0.9487527554088898 0.2426255349216656  
0.4197243567637047 0.0486371987622279 0.3280515604524791 0.6911237043369562 0.9413001592626132 0.0776467999488572  
0.0840296700983079 0.8713756848670666 0.1088222578918450 0.7990630800208481 0.9395433658592826 0.9719445474025250  
0.0939700710261671 0.0009290523849461 0.0912136511114945 0.9059080017070482 0.9405904342177097 0.0798646473188169  
0.1022051157458327 0.1307687210018851 0.0802841667611995 0.8837947537180687 0.9468656305916061 0.2690741017719765  
0.3052713438327948 0.8719873826241081 0.1222867592299175 0.7554830694466117 0.9451861612738371 0.2457037272948869  
0.3060390458265592 0.0009199762962398 0.0969258307934612 0.6264452497130129 0.1536087581806600 0.2363749956512100  
0.3027782176018558 0.1291001515901219 0.0677682660403914 0.6936754038960286 0.1584997010932723 0.0746355576211573  
0.5029997627391540 0.9507561273941949 0.2960379499918055 0.8021610187890421 0.1551630368818071 0.9696554979308255  
0.5063618919690728 0.1451513201798284 0.2973262271905070 0.9072273967878638 0.1637177384917231 0.0790257943676861  
0.6265713136466527 0.5574906120260946 0.2467444818836501 0.8832502737625847 0.1573960451828433 0.2694943924936980  
0.6919616600590751 0.5594690194557480 0.0807644655071481 0.7558279234807965 0.1575593840197498 0.2435418913964453  
0.8001505124906355 0.5666659667173145 0.9759081933403875 0.6954198006860128 0.0506863017592653 0.1822152521591715  
0.9072287901100080 0.5601303719607756 0.0813801304006195 0.9257884875327210 0.0522726545880409 0.1733647215947311  
0.8850204844161089 0.5476096427063036 0.2689947601901672 0.5855368658026563 0.8735599610954082 0.3899017900935718  
0.7559093517007862 0.5498899503024416 0.2466587060839983 0.5913847610290551 0.0026092810376758 0.4130371240604439  
0.6247062985696865 0.3404524757004077 0.2362139515357775 0.6017718337093950 0.1319184164459508 0.4261036797645001  
0.6970632390077558 0.3413762307512837 0.0790800929112122 0.8114005377241336 0.8737206129817598 0.3827511641254793  
0.8030158407617290 0.3449037345397776 0.9682833231092135 0.8097285069488782 0.0033370471374793 0.4009048139227899  
0.9071671285961026 0.3306434115584390 0.0803642426452119 0.8040543757952042 0.1322119922571119 0.4203407582646869  
0.8827669143334904 0.3437648949977750 0.2688248333149897 0.0038546135952787 0.9497388128029864 0.2053033381920954  
0.7541151399755240 0.3489839929622748 0.2517209161831082 0.0041489208317575 0.1537655193520721 0.2051389371522778  
0.6862483662171388 0.4494432384822022 0.1850332926326336 0.8720758472606881 0.0584426929069600 0.7426614993367192  
0.9248491685834072 0.4448999764731374 0.1652402085540162 0.8079849491142701 0.0567685227989740 0.5777796370362710  
0.5770906916520865 0.6368758765283686 0.3831199339617285 0.7025086655246683 0.0570963048611347 0.4675006257944280  
0.5862438248320713 0.5091358690450667 0.4197529623420585 0.6001311776862605 0.0612619690771152 0.5854726071364605  
0.5869091645168527 0.3675283030363647 0.4197891247901804 0.6152417663039833 0.0552053188858022 0.7770629977423417  
0.8174982974755365 0.6297975278004924 0.3707290662540278 0.7425641381212611 0.0586732091655708 0.7446629840540951  
0.8088307638489336 0.5028550547607862 0.4117793360270489 0.8736119108444897 0.8448596093443537 0.7358868568286684



0.8083228400928341 0.8511447790328044 0.5724432915865437  
0.6995233304822521 0.8485349413234399 0.4714380353409379  
0.5916790684591116 0.8422605835715217 0.5779484650295761  
0.6165538773444220 0.8445969932021588 0.7683678344451582  
0.7442886390161041 0.8416801383856853 0.7405237246889623  
0.8056755424487295 0.9515401286546670 0.6948524495294918  
0.5743030834615132 0.9510892601535693 0.6788782073739957  
0.9172283991026253 0.1266922680677516 0.8927829055102322  
0.9053546493195063 0.9976539164898659 0.9071156361311518  
0.9012650104942534 0.8675664800061448 0.9227481970353398  
0.6891334514545653 0.1299148226459076 0.8857760751005529  
0.6951061605977561 0.0005429132550104 0.9049977581898166  
0.6957277438417402 0.8704271063816895 0.9166510740339201  
0.4972769419122219 0.0548696581280704 0.7030862521702437  
0.4955456066668781 0.8500540096261961 0.7074339660454680  
0.3719696475112074 0.4395549318196992 0.7490515306076999  
0.3092980315959214 0.4490398598984351 0.9155848622345111  
0.1987925915946243 0.4380667285239668 0.0150161066300748  
0.0882230636864369 0.4383622119098946 0.9174845339970135  
0.1140432228204724 0.4458353100920719 0.7267708327101404  
0.2420121412951205 0.4406478170269498 0.7519101623904311  
0.3757278365953316 0.6571898929028586 0.7595564009272209  
0.3101862574349727 0.6415199923483960 0.9231083610420505  
0.1953564824349015 0.6497364923658818 0.0440480055385503  
0.0943666119935682 0.6605014959882383 0.9235459412037245  
0.1195325148489912 0.6557395797070564 0.7331115977476947  
0.2472277715063734 0.6607546145391732 0.7562469488345187  
0.3080156475834707 0.5488188864406488 0.7868328218462596  
0.0743767396276809 0.5508458246512011 0.8249050775461354  
0.4185474209920478 0.3728340217904140 0.5970931031116984  
0.4088623007524320 0.5025682397209671 0.5860714530790889  
0.4033196781071816 0.6322492169070916 0.5727435241130436  
0.1862144441825938 0.3720268807387678 0.6113826678082683  
0.1922439820226250 0.5014112028343564 0.5962324628327493  
0.1969475466775839 0.6313764214577617 0.5821439796406818  
0.9927219842749312 0.4518381453194936 0.7904916183204825  
0.9989976874649359 0.6543588670862698 0.7939063920998357  
0.1271933488470602 0.5583810609232956 0.2568116526672073  
0.1916726131535049 0.5598572879743718 0.4234117531427841  
0.2990801262674559 0.5591798538613538 0.5311193147811595  
0.4010028489352535 0.5609696980123738 0.4135025816350020  
0.3835649404305656 0.5404153734042767 0.2251558361822085  
0.2562168285469989 0.5561318141745226 0.2572646663866113  
0.1247302191715118 0.3452254970535971 0.2640632397324210  
0.1947234525094104 0.3438133085286363 0.4228177184817588  
0.3009057726615049 0.3459727727685522 0.5312663188192253  
0.4027296572349155 0.3340870355369233 0.4125405570275867  
0.3806207241859781 0.3587503512897577 0.2243976915661551  
0.2538489918341888 0.3493802182232731 0.2500809663324632  
0.1899553931522820 0.4517458416577319 0.3152573410267836  
0.4364478527948977 0.4475159317026189 0.3366317399645138  
0.0769413821416067 0.6279040319405644 0.1097512006606426  
0.0973131839545022 0.4994059287540579 0.0886829845007872  
0.0975125917295545 0.3689316195498268 0.0772807948283270

0.3207728482567817 0.6289883869216870 0.1269245867788381  
0.2973026912285890 0.5043484477230716 0.0885314345206233  
0.3039906090572841 0.3746473150795852 0.0741477620960740  
0.5017587641146621 0.5555619512673140 0.2888049451274993  
0.4997495385361430 0.3386399166821390 0.2826468468733639  
0.4251462228851058 0.7497127031476467 0.6436911787618967  
0.1876160039911147 0.7511376849209079 0.6495247497012440  
0.2916276576784546 0.7539169718206016 0.0494043614436177  
0.1101221805203995 0.7489628228381019 0.0616687453167771  
0.0826010930846398 0.2497880171190281 0.1469217269452472  
0.3166536121801261 0.2564132734988972 0.1517122139737209  
0.2126454964202777 0.2513887988329224 0.5571607703745634  
0.3876696356353739 0.2501585064574699 0.5573001717816928  
0.5781870596294943 0.2472049941167077 0.3506710028783260  
0.8100279743141465 0.2514337200094691 0.3493664148093101  
0.7144913738675079 0.2504246043053518 0.9426944933783414  
0.8891213663874744 0.2490538129169419 0.9352724839175521  
0.9199933707434650 0.7504549556750624 0.8494614735515487  
0.6861064813138453 0.7501991392976726 0.8487279537521236  
0.7898842257810719 0.7540151817100534 0.4453853793514432  
0.6127763211589584 0.7527886135452913 0.4427382860541132  
0.7735382525071292 0.6737122906564790 0.4744984757971220  
0.6206927357669704 0.4386818699407846 0.4628601003003975  
0.2745455692295443 0.6731759605423573 0.0258353877880252  
0.3066082998359669 0.1741289908651278 0.1731960585485474  
0.6458033902849420 0.4098556891952301 0.6240742233183328  
0.4237506761481397 0.1795409135675878 0.1814830862613705  
0.8486189230646622 0.6585483117372887 0.3381867133961403  
0.3607758792344957 0.6511717342294610 0.1455335747993262

### ET on BAS (T2)

0.4239609166602032 0.0587653913455130 0.6610267551704281  
0.3095170157038189 0.0269408449837943 0.8056193718691398  
0.2797687782366550 0.0597817181582462 0.0271519880331016  
0.1230884542143291 0.0616192059889905 0.0291505296128053  
0.0696886301983669 0.0283029674290969 0.8187076709436827  
0.1856926778438835 0.0599419126690057 0.6754703590028370  
0.4232125613172689 0.8264095060953750 0.6757827510130959  
0.3096759352874615 0.8695939246775121 0.8153585751711520  
0.2760285895135993 0.8287936937279340 0.0326104307879282  
0.1205356651742476 0.8244676499647915 0.0300692152897308  
0.0696392534953605 0.8702113761161798 0.8198397406666836  
0.1878669854998679 0.8273130283319856 0.6856833377603212  
0.0781706967636578 0.9408226328957892 0.1665664543485512  
0.1897411637463840 0.9707923180506947 0.3161674675844985  
0.2207022988331926 0.9396566743038661 0.5351417439903025  
0.3775675961470533 0.9366396598179121 0.5305336834377654  
0.4271421379041431 0.9691010385421515 0.3173502613516015  
0.3114596451624251 0.9422682504501679 0.1755162110325173  
0.0785346721703729 0.1722301878048476 0.1754088807318211  
0.1895561299190408 0.1292467000646333 0.3209651449494692  
0.2218340808832022 0.1734152470682741 0.5354414209646202  
0.3757336234485470 0.1738364940014215 0.5276293303428856

0.4313681400537026 0.1263266652809015 0.3222337053969251 0.3098281867512071 0.6267204992474096 0.8098200348666965  
0.5733447931625378 0.5628307860750443 0.3363579992630035 0.1191549003592218 0.6716587549514014 0.0330170811345626  
0.6888634288094866 0.5295778373417631 0.1910920195335014 0.0705751526487234 0.6300842369204849 0.8186291863294577  
0.7212272917255560 0.5646868073461456 0.9709735553812978 0.1880378647291523 0.6744285729426366 0.6833982927514404  
0.8784319043800408 0.5652295526158988 0.9707047245850156 0.0767838438812314 0.5575282342164930 0.1656323163781591  
0.9304544077660426 0.5236234542100698 0.1784313528859202 0.1883181841129156 0.5301420680777371 0.3160326266883101  
0.8145924123487202 0.5546193975871905 0.3227669924367774 0.2199810782887782 0.5628798826374900 0.5351363177919499  
0.5724604803211892 0.3255383620637670 0.3235883463066043 0.3772033975549987 0.5636318896090886 0.5272809563369040  
0.6906808806522465 0.3705542503465381 0.1898099091501377 0.4303613788635404 0.5250400435908115 0.3184095885858818  
0.7259083806016570 0.3274889823677370 0.9712916036128835 0.3118686217688719 0.5524991947160180 0.1787333405473125  
0.8794642223881293 0.3243736243114783 0.9695659564308109 0.0770656613932349 0.3265445822850343 0.1730709294650778  
0.9296918088512867 0.3665801733223144 0.1793050931652367 0.1896456415969173 0.3717827567976933 0.3137751799701173  
0.8142337748154532 0.3282662546658887 0.3224928013050787 0.2236608555448323 0.3272451354423443 0.5303610838721858  
0.9198895473495023 0.4412296373515016 0.8361979295048112 0.3772742781481618 0.3254255475700822 0.5237409552684940  
0.8041805812777094 0.4681311676364809 0.6933527285082554 0.4292356329018033 0.3691210151511516 0.3141284451010378  
0.7812083381865461 0.4376734464050848 0.469668807790994 0.3118765047011319 0.3342146897978790 0.1747921421484787  
0.5703364693484710 0.4729956929041622 0.6958255432719642 0.3735048715144232 0.0573430447777085 0.7519440425529856  
0.6853913292219476 0.4412083636625751 0.8332307912496942 0.3106154982459392 0.0487893623486672 0.9185788838940097  
0.9244401074421900 0.6726520790948330 0.8241642699313231 0.2008410213912755 0.0539854360577140 0.0195763319132857  
0.8083318957878549 0.6261158805544230 0.6896588881837115 0.0905701256087421 0.0615483797908797 0.9214757676491838  
0.6176630407063913 0.6747534047965035 0.4644966628973948 0.1163286154887217 0.0538108329108450 0.7310412512454816  
0.5706141091934812 0.6301574109582402 0.6793697846993335 0.2442238457498916 0.0544940225229812 0.7540212367665350  
0.6863979370794054 0.6734963930033131 0.8198684640416096 0.3743429278563475 0.8363767050484696 0.7680035237411752  
0.5767661112202271 0.9440242441484116 0.3354202696461098 0.3087962481881656 0.8555870594159098 0.9313083198837558  
0.6920104328456625 0.9714446188867187 0.1871862244408266 0.1976442692475258 0.8410309142599277 0.0256894903055638  
0.7202661468129687 0.9382976669179895 0.9673699678702120 0.0891005530140154 0.8371171733493565 0.9230793083489435  
0.8774770312043403 0.9363672533121618 0.9694734557411337 0.1177042102626399 0.8446537542009774 0.7337044287966829  
0.9300600003572637 0.9720289036315739 0.1813973502494329 0.2447958774480518 0.8387756876542420 0.7657794983000411  
0.8140088852687347 0.9418959534618946 0.3242547055690030 0.3114768244612601 0.9477398024760025 0.7937419310656841  
0.5782775523339000 0.1702903767097125 0.3275746915766775 0.0748584959885272 0.9492148124386164 0.8286178516061972  
0.6930526208480920 0.1299072261463773 0.1848932982463406 0.4159839552548011 0.1272533098957913 0.6011326158829582  
0.7246302245003512 0.1738899375646203 0.9688828465501470 0.4115439227843413 0.9977848801988333 0.5868472467599165  
0.8785848150029760 0.1730172438973620 0.9695176566736906 0.3980515848566168 0.8681493892488926 0.5819667508157637  
0.9302823436778686 0.1305240285797465 0.1811594299286305 0.1886660616802532 0.1313010973780452 0.6228452032632743  
0.8139395975725510 0.1737610743127198 0.3195691362956442 0.1917574238274221 0.0022621572882045 0.5940556506151540  
0.9220402177458309 0.0577204281930022 0.8328331901272826 0.1995623545663092 0.8719988858562394 0.5890981351540193  
0.8068589160745477 0.0310633793008799 0.6896035751180712 0.9957090580626304 0.0496762944677289 0.7922251669719903  
0.7805693831968860 0.0620498818902433 0.4660443515456971 0.9959912383048825 0.8490278445772647 0.7910420946162946  
0.6236679488945102 0.0629983607390822 0.4724993531385114 0.1264380385376001 0.9416440447341774 0.2601384422587439  
0.5717951822190440 0.0302905674096943 0.6857661296977573 0.1918285361678654 0.9391780563629745 0.4252206857904249  
0.6861758536564924 0.0609377871714296 0.8284073806379282 0.2994888598737990 0.9453397290784183 0.5319653980715101  
0.9228664189529209 0.8280438639889067 0.8236427639726331 0.4037305871573646 0.9352907884143591 0.4186089730447032  
0.8075983466869581 0.8725107623615402 0.6860058472694637 0.3827841800560463 0.9447074315673865 0.2274422241737021  
0.7764570335280191 0.8293991401280113 0.4681376092544757 0.2559107218167309 0.9498838469425019 0.2593147885985324  
0.6213660358566659 0.8283703176144968 0.4702226682263980 0.1247428271422167 0.1584360604981916 0.2684882316116000  
0.5695140836722796 0.8720591952208631 0.6825942764294239 0.1874368959588453 0.1554562749966833 0.4332436799936625  
0.6858918673457479 0.8272123034529697 0.8180458206950715 0.2992264721415269 0.1555251043109564 0.5302043707863576  
0.4225543955538913 0.4405067538425266 0.6574599356258355 0.4027544961964484 0.1634477050940989 0.4160210362048190  
0.3078179443938355 0.4699712821012828 0.8004432062811744 0.3917246295755113 0.1567435393073622 0.2223458615524656  
0.2767323320744277 0.4421657962478066 0.0221127398390557 0.2554853685861820 0.1523962870925767 0.2682328481855994  
0.1202030821144043 0.4368427904175857 0.0254876625849780 0.1843168498777076 0.0496691319778738 0.3223413323959461  
0.0669454677105726 0.4717406356581034 0.8146837520821550 0.4192214544498682 0.0488939869328363 0.3280104647586783  
0.1837986571193861 0.4401104318702045 0.6721071764463213 0.0851228683463043 0.8710676394287116 0.1102780166128976  
0.4243939738202983 0.6724724547879815 0.6715429263838152 0.0944256869136668 0.0006488560986417 0.0922447962357097

0.1033456539138091 0.1304329128665181 0.0812702599035176 0.8835622392257446 0.9457177880835757 0.2687953113719762  
0.3049563184941503 0.8714865287822477 0.1228830034575099 0.7552645941426971 0.9449985105650667 0.2452505849356468  
0.3062832123030757 0.0005386501809720 0.0962916278483602 0.6259741042957788 0.1531500045639464 0.2369195818234956  
0.3020755246875312 0.1291862511349436 0.0697767009898249 0.6927386581330800 0.1587765463261894 0.0749790426666019  
0.5026742573923612 0.9512314270600015 0.2956681935102463 0.8014244301390799 0.1551822287310126 0.9704035032185921  
0.5054844817915879 0.1451666811678096 0.2960233973140293 0.9072895733422133 0.1625412538740432 0.0783459280109818  
0.6251015617929612 0.5580534756243291 0.2455029022688155 0.8832761111759684 0.1565386592542554 0.2686410990206086  
0.6911151606735877 0.5578270906088061 0.0800894479208245 0.7555112664003246 0.1578255541636562 0.2433030590520140  
0.7998142908656241 0.5672000197212818 0.9761054501268914 0.6955895795141060 0.0507616076401897 0.1817901564545481  
0.9079819977110544 0.5605935136056769 0.0797629242741011 0.9256395669156989 0.0513380118018758 0.1739443879317396  
0.8835755595563328 0.5464024389615237 0.2675830971149809 0.5853756370268118 0.8739585750502611 0.3894750729526515  
0.7543440436173147 0.5535112893588084 0.2478177156307052 0.5907977225738364 0.0029030814075391 0.4128300942888237  
0.6242728991199793 0.3410959085559143 0.2357630664070392 0.5999578689928957 0.1324042944832103 0.4262977778600606  
0.6968713813470752 0.3437891191385830 0.0785435346605316 0.8105965931130215 0.8729188571792744 0.3823761578734903  
0.8030103379944152 0.3451572871675547 0.9679493660708312 0.8092386245002414 0.0023634772996291 0.4010314529129499  
0.9070035864794088 0.3306215120811210 0.0796740873599095 0.8045263559712872 0.1313082853514910 0.4192621070200341  
0.8826781160420183 0.3443798314331508 0.2681281927965121 0.0036937719908652 0.9486982766144695 0.2050664897795366  
0.7538830933161867 0.3473059969850311 0.2514058777178661 0.0042037705500625 0.1527403754979195 0.2044749353994413  
0.6874686464391239 0.4500709656166734 0.1892836674853776 0.8725954058248796 0.0582800535229340 0.7406639409168669  
0.9251068683644570 0.4451938203024925 0.1628629079443925 0.8065422229886836 0.0563899948522546 0.5772802404861215  
0.5745403067869629 0.6362409050402669 0.3832538587425838 0.7018258799803473 0.0577257212822578 0.4647813904010863  
0.5865479688355466 0.5088592401183909 0.4192683987526931 0.6005283723143648 0.0611798100363798 0.5851759005395091  
0.5863605760325216 0.3675178059438042 0.4197090189993203 0.6155556800349762 0.0552850386132237 0.7767346646394445  
0.8187129946364732 0.6287883516132581 0.3740108551812333 0.7430801966064978 0.0595571461139895 0.7457023118021678  
0.8082739812559248 0.5007756228817091 0.4079600560163856 0.8742229537908962 0.8450857151652971 0.7340144780461771  
0.8112910757416510 0.3705538988059968 0.4228748729698193 0.8072119959941678 0.8522889819198135 0.5722213813348292  
0.0039697853067186 0.5441483175604389 0.2079602374337368 0.6986153091518269 0.8448239202468708 0.4703694725472816  
0.0034430967034749 0.3456653133681865 0.2055632032009063 0.5912859096373908 0.8428887524708419 0.5776824261765993  
0.8658699015508303 0.4367618990750620 0.7501971197695936 0.6167037485149437 0.8444978805752890 0.7677094221886230  
0.8086105222007842 0.4448113871465511 0.5807987216158969 0.7447123554299717 0.8412491947594556 0.7411568813091278  
0.7038522926221982 0.4360956855941333 0.4684460072248002 0.8050220598803727 0.9517220296505183 0.6960001674186537  
0.6095103956027974 0.4349274435386107 0.6010469926035401 0.5742265049764410 0.9512153108025238 0.6791344468407676  
0.6116512080709646 0.4492018983086312 0.7895269844292503 0.9160257400885292 0.1265108227147722 0.8919415503687316  
0.7348834543503329 0.4404983860764408 0.7390858864535547 0.9048744478644866 0.9973992885694393 0.9057710541673978  
0.8760433766026896 0.6529617101517026 0.7361386222951286 0.9010023025737122 0.8674657097887298 0.9216888575180778  
0.8067129387834383 0.6438467323166713 0.5767045867142911 0.6884578181173965 0.1306097100781005 0.8860148949295303  
0.6922380514860872 0.6528102440255610 0.4571772294512534 0.6950913943445455 0.0012644438308268 0.9056589628683905  
0.5898640403394629 0.6601366630307312 0.5745185093193111 0.6951290114713337 0.8711719016135251 0.9160562137513101  
0.6186442645945377 0.6555245348688183 0.7649150930285498 0.4976199862591282 0.0550629536217869 0.7026560601402747  
0.7473789833171519 0.6587967778911018 0.7483429883000716 0.4955113408493487 0.8500546038220280 0.7077265934353005  
0.8047032604569175 0.5468198166494452 0.7065679051921899 0.3725200197339780 0.4389995865037328 0.7490677956051592  
0.5755965842659706 0.5500387427470664 0.6754430406478223 0.3093374813041182 0.4497944967188233 0.9150181120410156  
0.9191763603638576 0.3726378827760521 0.8966524932982063 0.1984758498357270 0.4397929428641556 0.0134489814971782  
0.9024174171854407 0.5020781241799295 0.9082659988774752 0.0869176686548456 0.4393940135412305 0.9187129810069701  
0.9051503976407953 0.6327463836886946 0.9230214234658837 0.1142575606584306 0.4445773987403387 0.7283680705468289  
0.6886051136215848 0.3717324123176248 0.8899785947759308 0.2425703491669692 0.4398615116812131 0.7512088343143747  
0.7005263366233450 0.5008950184124400 0.9067308977066405 0.3747490302043602 0.6581377021964328 0.7605372715186378  
0.6925126147744357 0.6303053545377534 0.9197337626761336 0.3106904247071184 0.6387744214078644 0.9247638320308058  
0.4967880734592470 0.4469251322703367 0.6990308622127651 0.1942289169329615 0.6509006520105267 0.0397137903400629  
0.4964780480421663 0.6498342552679431 0.7066453057819988 0.0910857578522752 0.6599145425058215 0.9232665757656098  
0.6257482859897030 0.9489822449053712 0.2425590371264158 0.1185861601111717 0.6562102844019884 0.7329060155280310  
0.6909844323186329 0.9412806770712185 0.0775628768221530 0.2459963747084213 0.6600892216524824 0.7600519444121273  
0.7989083994745926 0.9393197955510771 0.9716781062183368 0.3084806191985496 0.5484841123628859 0.7844808893824381  
0.9059918075561689 0.9403621701909358 0.0789837287995842 0.0735290959891863 0.5506660995117388 0.8228807454235779

0.4185761719150859 0.3724807975747546 0.5964483763689853  
0.4084363704157818 0.5022387284067817 0.5863258681405066  
0.4022991551139435 0.6320229372001966 0.5743109287715026  
0.1859573285957242 0.3722843271313167 0.6101183840524057  
0.1912756232608188 0.5018438650337965 0.5978074474700489  
0.1974665348945584 0.6315804050534416 0.5840508906657089  
0.9921208583293157 0.4515614779360804 0.7896985069933569  
0.9977978817477002 0.6537860606541227 0.7901854646757389  
0.1260052886198745 0.5591690999497230 0.2585803040137964  
0.1905269015963686 0.5606652962312638 0.4251143585346881  
0.2987014735930888 0.5584090752466365 0.5310609817250519  
0.4007405828335109 0.5614738712628099 0.4141893206531343  
0.3820160033534778 0.5406678538104788 0.2263999605851262  
0.2547977168228457 0.5525108527697423 0.2590092366101171  
0.1240527747177728 0.3434852626646073 0.2645185648898730  
0.1948515407381423 0.3411740850505258 0.4223827422072492  
0.3009163742350342 0.3456414291866597 0.5310144292631450  
0.4029034657323974 0.3324642871387196 0.4121902107810004  
0.3798690493534480 0.3576304294100093 0.2244706889636141  
0.2528787079545095 0.3531975910635692 0.2495300309057704  
0.1849217071368515 0.4511615799820209 0.3208576214363593  
0.4335898626589705 0.4470226407655127 0.3380996544863284  
0.0767966627569526 0.6275283422284514 0.1099934136959280  
0.0967793115925245 0.4989084959695307 0.0909597303434946  
0.0988287731527641 0.3686318741003535 0.0773681871139450  
0.3166298349467280 0.6301857914118411 0.1317394128775843  
0.2968001432227259 0.5070433973276606 0.0863712225048684  
0.3038466233678269 0.3769311447853698 0.0744656897695174  
0.5007905034491082 0.5536648090749925 0.2888146497239777  
0.4993337705060743 0.3398075653623726 0.2817212437918847  
0.4246628720333299 0.7497634714825596 0.6440564012070660  
0.1882755661687009 0.7510342569954417 0.6517020735834369  
0.2930674069468290 0.7529186724284667 0.0504200391734377  
0.1079799951808677 0.7486256674141594 0.0609916892381411  
0.0816630105804456 0.2494436636762730 0.1459494262513014  
0.3127217349860239 0.2578289617451051 0.1507947165516035  
0.2128806381040907 0.2509735172514474 0.5593982329936460  
0.3876191582494806 0.2497975116412452 0.5579287052182617  
0.5770192598964832 0.2476052426291900 0.3490195320195709  
0.8112918247340076 0.2507591363216708 0.3490690274118990  
0.7140925606063342 0.2510311331099323 0.9437922954971500  
0.8887530173979726 0.2487361431891074 0.9351576334991624  
0.9197161772313561 0.7503465713775506 0.8479233879740944  
0.6861032324914436 0.7505147777539178 0.8497462737505821  
0.7930618521698448 0.7536788805285911 0.4478857574925465  
0.6080428564150921 0.7526462903807339 0.4427106831145919  
0.9179678884865626 0.6947150877094372 0.3863680944942913  
0.7726877368657495 0.6722143802342130 0.4702366775019410  
0.6206756393970426 0.4382959129408212 0.4629141950392054  
0.2743502198154439 0.6724974048881888 0.0256447843599564  
0.3054835855281817 0.1755492531734638 0.1739488623159424  
0.8662127547505780 0.6531116296407868 0.3750642641380925  
0.4235179018527259 0.1727185244522044 0.1749584419618827  
0.3475562544110214 0.6589387839875464 0.1642451686497354

0.6519666052507274 0.4189534217508351 0.6233105852072303  
0.9257833417940831 0.5893110272197646 0.5141637696847166  
0.0115404552639697 0.5947893022855314 0.5239060711878395  
0.9763146855345268 0.5788719053191606 0.4085775795598928  
0.9573883974407721 0.7062031340410109 0.5262245184724382  
0.0144872216634393 0.6968368755532471 0.4282013851716701  
0.8969387562867274 0.7363222839906584 0.4029419311405774  
0.9700528944586378 0.6061494963934293 0.4769934250429679  
0.9683356418483575 0.6791969486155485 0.4588005205134813

## DEE on BAS (T2)

0.4238472919612035 0.0590070172032442 0.6625865390096720  
0.3097836047869222 0.0271365498140934 0.8074309407663980  
0.2796695508001217 0.0594458265206319 0.0290584538365075  
0.1229392526087582 0.0609517238527006 0.0303815346359686  
0.0695016356019719 0.0282564080855529 0.8194047800752602  
0.1859126739087000 0.0598037298147888 0.6767370965761902  
0.4229687548269925 0.8263158980597782 0.6774379175284152  
0.3093899280696085 0.8697255885474240 0.8166608091700539  
0.2758298214279210 0.8282072938211024 0.0339215542464737  
0.1203441000780494 0.8241803845502721 0.0310902889402300  
0.0694422684393163 0.8700834396154056 0.8205794351935157  
0.1875245280259230 0.8276443030715177 0.6862286460235479  
0.0775947960683523 0.9404100901613633 0.1675544575808787  
0.1893389835906691 0.9709773769959458 0.3169300580584606  
0.2206656907602542 0.9396975207145585 0.5358676619925093  
0.3775562549128068 0.9367429657997287 0.5321612268560485  
0.4273011718653285 0.9689964232799890 0.3187033451941344  
0.3115206337303590 0.9419153696129852 0.1768272374965584  
0.0782648803459336 0.1718016833209472 0.1761618192893537  
0.1892428732643798 0.1294477403225378 0.3225524195770606  
0.2217941429508849 0.1733471004083105 0.5367142525029504  
0.3756050207103170 0.1736805122227803 0.5284970468233486  
0.4314063577353849 0.1263007241715631 0.3230339033486033  
0.5743388836035541 0.5623611066353635 0.3386080814142970  
0.6907100262261098 0.5289080256909841 0.1934814382040831  
0.7215566886574917 0.5643312267887489 0.9727948394303583  
0.8787683578262829 0.5646941426724003 0.9724462878665392  
0.9303036223747106 0.5235416654095216 0.1820281453403806  
0.8156552783815386 0.5569033085478370 0.3262487974254479  
0.5735811572857273 0.3253219332356096 0.3267895559198443  
0.6923438030338862 0.3699504678475807 0.1932521954361119  
0.7254540167225629 0.3269970525325800 0.9739238837732926  
0.8791099744679139 0.3243005230442490 0.9728126168342377  
0.9294367247756627 0.3663200231121100 0.1830603934922918  
0.8154458416227693 0.3281044187823726 0.3270477545646549  
0.9199267507879906 0.4401164198329447 0.8387733267642311  
0.8039311163716282 0.4668983904439576 0.6978280063178421  
0.7822251477732555 0.4400886261626720 0.4722938550990690  
0.5706339439435210 0.4733168016951405 0.6976812269392073  
0.6848183744715898 0.4405694227162031 0.8359725098464715  
0.9246446359849388 0.6722328999596555 0.8265221621744744  
0.8082049499940693 0.6238219969589346 0.6938192627125117

0.6194509646397269 0.6741747006503723 0.4669559848494393 0.1163463291528739 0.0536350314278155 0.7318604701686207  
0.5703798316837626 0.6305386751940566 0.6809425332671805 0.2443010320436128 0.0540543461520781 0.7554778824180776  
0.6860023067670638 0.6728741037671502 0.8219506373251646 0.3736585602378886 0.8358991562778333 0.7691860992751848  
0.5768135258647850 0.9433936083331516 0.3361490693261200 0.3080115456708206 0.8553281508286434 0.9324574818630611  
0.6924856274322129 0.9709802367768331 0.1883898120981404 0.1973956199242787 0.8405001895549540 0.0281908163689102  
0.7199727582232743 0.9382439744006962 0.9677022506040944 0.0896952309847846 0.8376154715370008 0.9238954677839706  
0.8772607517790636 0.9365553364059669 0.9701244510411761 0.1173555615511706 0.8450943452713083 0.7340300697428871  
0.9292679345284600 0.9711751373820973 0.1836811340567973 0.2442224176693345 0.8401348582898215 0.7663419619283933  
0.8133210040254463 0.9393706125191534 0.3255200044435156 0.3125013483995849 0.9479917172752067 0.7961260002728062  
0.5783658106250915 0.1696617594667978 0.3293590954494737 0.0736192045651880 0.9491586691841950 0.8289896829755908  
0.6942505389524847 0.1295055598487080 0.1886800787944770 0.4157818487409663 0.1274434043187717 0.6025476418277154  
0.7246101830939856 0.1736056261012874 0.9715955129620153 0.4107700733093860 0.9981240765016126 0.5886571365154348  
0.8787708480277778 0.1726175375436733 0.9717115650955753 0.3982772127570830 0.8684028579180513 0.5836244551449039  
0.9298379722266955 0.1298525385475358 0.1842090714854686 0.1891833225862702 0.1313065798275308 0.6246441221366001  
0.8144461091059340 0.1741355299227589 0.3242725896031285 0.1919975907893357 0.0023538039902047 0.5949787670660623  
0.9218133498748018 0.0581869971996604 0.8336707086390944 0.1993138703358399 0.8719368150329836 0.5892137097001138  
0.8062700161713582 0.0311786018497859 0.6925968699765314 0.9955735214485093 0.0501723059549026 0.7935336259580668  
0.7807400822621853 0.0603090335436483 0.4671078999311100 0.9959755567906400 0.8479852217676036 0.7926591431762612  
0.6237658128237703 0.0621094587895983 0.4737583020859368 0.1260794812197075 0.9416250055980031 0.2608626600913686  
0.5720154681485113 0.0298444818750112 0.6874540501633429 0.1915481760969233 0.9395298199715116 0.4260209020621708  
0.6859538883338379 0.0615618340868384 0.8296538437367827 0.2994286218086168 0.9450525989117640 0.5324622365992054  
0.9227706830249184 0.8275826887453621 0.8252138679214441 0.4042241756310789 0.9358486857710435 0.4205432574954369  
0.8072652026388517 0.8734897565936605 0.6897362735406344 0.3825181471173051 0.9440390302928534 0.2295953281052186  
0.7748734215130318 0.8304442939176789 0.4738092838736528 0.2554309954882744 0.9502812875091466 0.2597064729816932  
0.6212261866769718 0.8286595277272288 0.4717892338963519 0.1249813218684978 0.1590229462762185 0.2689875169009717  
0.5689490394380196 0.8714345348338451 0.6839291926550759 0.1867101666767090 0.1554930328952286 0.4348832318418797  
0.6857116635579606 0.8263016552902408 0.8193273218961922 0.2991054591080311 0.1552370157611249 0.5303298243933593  
0.4228611699330470 0.4404349349724949 0.6577459979176840 0.4029014327128967 0.1630723532529261 0.4171259673668416  
0.3079345204221247 0.4700357676627920 0.8006355037194375 0.3915512779623562 0.1569203175271492 0.2233833000286020  
0.2774991549777503 0.4422484640133334 0.0228323282935737 0.2556095606898437 0.1523050780121830 0.2708826501373258  
0.1208724287494464 0.4366360453686819 0.0257791483964080 0.1835479699270264 0.0498618206552830 0.3230357771162521  
0.0669671400786904 0.4715228514277257 0.8151471367938019 0.4194042844955580 0.0488576658765770 0.3281474090063779  
0.1838347243006161 0.4402070677885661 0.6724796485901559 0.0844853657617958 0.8706287794012521 0.1113251912596426  
0.4242152861851788 0.6725454649599280 0.6727479582068595 0.0932816997124411 0.0002972644594902 0.0931747509740349  
0.3095522749500251 0.6266409957277014 0.8106518488550569 0.1034988884940198 0.1299475142168079 0.0822224117829386  
0.118774341767637 0.6714364284684670 0.0334627361440567 0.3047814456722209 0.8712957760864499 0.1239377855232971  
0.0704741933468685 0.6298801183744742 0.8188434291075805 0.3072586359828155 0.0003884731405397 0.0975747954068685  
0.1880186099915007 0.6745224879538216 0.6842184286488009 0.3008694311150650 0.1291470627271099 0.0721894432717638  
0.0770858890812867 0.5570720463341813 0.1659570701652682 0.5027112564570853 0.9510329154637086 0.2964059900247607  
0.1882093608630580 0.5295989869784907 0.3171810747989826 0.5054012841229141 0.1455815147274963 0.2968245485533224  
0.2202501884568176 0.5630841793303750 0.5357821443347067 0.6270056340004533 0.5566699099067480 0.2488428070135844  
0.3775467575246944 0.5637190296076383 0.5279383943233210 0.6921615211281246 0.5573719871016929 0.0824535259716226  
0.4311615624629023 0.5254411845193915 0.3192456540786282 0.8001604430441042 0.5685916594760539 0.9772513933686462  
0.3124194814908443 0.5521540012486046 0.1800272611198710 0.9073495783944812 0.5592304870860134 0.0822574007369300  
0.0773109034562603 0.3262111510208946 0.1728005149001106 0.8849279689282969 0.5495063017372630 0.2712100175994298  
0.1897497520574448 0.3716371045924073 0.3145027394715654 0.7567468228717076 0.5530545173565093 0.2485871386174802  
0.2236150598424437 0.3270925235479318 0.5308868133507575 0.6255851004821740 0.3417660515627198 0.2396994487402780  
0.3770897019904753 0.3253528160823059 0.5242652805852762 0.6981628781541378 0.3425194494245913 0.0823860922586455  
0.4297398570162053 0.3691921998053934 0.3152128486014706 0.8025597755058430 0.3444491946562824 0.9676458581106765  
0.3123484004211860 0.3346556395841825 0.1759100310738216 0.9045067174657389 0.3314293120103806 0.0839005291503469  
0.3736373612156499 0.0580548145248827 0.7539352254726841 0.8844515632526306 0.3417958936552078 0.2728477476325196  
0.3103392638221263 0.0494440322402826 0.9202591604279434 0.7552819790551993 0.3459924373044150 0.2548918448233374  
0.2007633193263226 0.0525132674083550 0.0224303665817861 0.6903823654002050 0.4494097699423255 0.1914258786489182  
0.0911717629386430 0.0610133683215743 0.9222502695447505 0.9230373866229462 0.4450874876865162 0.1699279708971171

0.5759411574527827 0.6356904098890016 0.3854867257744693 0.7019284205601160 0.0577728573597322 0.4648642893731487  
0.5860903501727514 0.5077912988316933 0.4213555388825314 0.6013651010455882 0.0599818710102103 0.5867793337563840  
0.5878066789049570 0.3664951164660160 0.4238441481431672 0.6152261683728821 0.0559691113116054 0.7783781267264146  
0.8173503615520362 0.6323954692890952 0.3739911052506354 0.7427097977504862 0.0621088618633154 0.7466093999808446  
0.8091773985947888 0.5046831702918284 0.4134052958703587 0.8740129854943607 0.8449970481690722 0.7360759992903730  
0.8130881701999398 0.3735909500389814 0.4244362434904551 0.8068569785622046 0.8583260014479275 0.5744982195973422  
0.0044041764860793 0.5434615314317101 0.2085125472334497 0.6974207324985524 0.8491997247490889 0.4751614180855636  
0.0039749190483321 0.3463686107784484 0.2052751605056050 0.5881491499668227 0.8427456581968218 0.5776204516790893  
0.8651645800109561 0.4337442410647742 0.7538936242479664 0.6168325091611656 0.8425646012609248 0.7673124373793740  
0.8082550605607973 0.4459685219790951 0.5842381300689403 0.7448620135792445 0.8397715879756963 0.742959832974778  
0.7048649843490872 0.437950529376022 0.4687781880636211 0.8038228774403703 0.9522692320822981 0.7067777242282697  
0.6119253249977145 0.4359187294325639 0.6041606106867452 0.5747986331551526 0.9506837134499738 0.6824720140320201  
0.6111589116767641 0.4500448415020190 0.7926629185864941 0.9162411793344152 0.1267478523298740 0.8933828482355534  
0.7339688008724012 0.4384709323251581 0.7411267974681934 0.9040290213906572 0.9976680001924321 0.9061043210075018  
0.8750877787262635 0.6521005011887615 0.7407413257814091 0.9012404354215977 0.8674178183049377 0.9234125442549997  
0.8070706798380451 0.6379132115812394 0.5800855416067193 0.6876834763224285 0.1303057900246515 0.8895782653111831  
0.6930794475451898 0.6498735005506476 0.4614890969043271 0.6957239916815863 0.0010387848323714 0.9050861279146826  
0.5896403144545561 0.6607040783397732 0.5764097575592951 0.6943865843753038 0.8710023947863751 0.9169898291395793  
0.6180502646233954 0.6557170456417701 0.7671855461141454 0.4977429720722785 0.0548232714532044 0.7031402373902497  
0.7467105109438471 0.6575906239180622 0.7503345053086166 0.4949521677859425 0.8501339734419825 0.7107600271385808  
0.8047436948328066 0.5450117065021425 0.7164319775869690 0.3728496670019404 0.4391159248194229 0.7494952327275603  
0.5751471554105971 0.5503407302509978 0.6771032394615187 0.3095312633825654 0.4500470223304983 0.9153377708496686  
0.9201393700127269 0.3722736011313217 0.9011171953730370 0.1991823926337799 0.4400854402557493 0.0148729531655488  
0.9019838703115186 0.5013399787337535 0.9100633920007694 0.0878618945143058 0.4392363193504058 0.9188695424113862  
0.9068766413933185 0.6322683536341180 0.9264046887225430 0.1141558417948738 0.4445480545096241 0.7284872111166910  
0.6870043672742533 0.3715780544947291 0.8942017340217658 0.2427549386659525 0.4395276766433350 0.7515038314648629  
0.7018824346168833 0.5001580278707454 0.9087495817531630 0.3743398023285241 0.6583891143936005 0.7614939993491180  
0.6916504682208539 0.6296205450262211 0.9220829501865819 0.3102039128791481 0.6379328617288570 0.9257642438316254  
0.4973661818219188 0.4462834043126059 0.6987167099646030 0.1937744151552529 0.6510080167682220 0.0410495965944099  
0.4961868015249996 0.6500863640712298 0.7082461629693448 0.0909306426039452 0.6596117373687810 0.9236898010490269  
0.6257531411350964 0.9493282536805669 0.2431690916258994 0.1185873443006852 0.6558649224818118 0.7333118661563390  
0.6905225980192849 0.9422688500568003 0.0778111777005520 0.2456785364218295 0.6603339773703867 0.7615024112327878  
0.7986255031341023 0.9384205861588332 0.9729658217324247 0.3082933081046436 0.5485038629486050 0.7841086757521900  
0.9058003687276223 0.9410091193480644 0.0797858902358219 0.0731438500569057 0.5504359089580853 0.8232681535886657  
0.8830531708687788 0.9423892171799397 0.2697710729391435 0.4184952874530209 0.3724619757314798 0.5966880269795755  
0.7551983455602437 0.9417962542333042 0.2450583781816724 0.4088678677062390 0.5022749297470784 0.5867841978579599  
0.6262506695200376 0.1515980943978897 0.2392290766297849 0.4023039723502166 0.6320526514359628 0.5754360293943096  
0.6943139812842375 0.1581099673624495 0.0786123843931430 0.1858211921258901 0.3725389477467566 0.6099806630913606  
0.8015000190656251 0.1553836754756277 0.9712116742816951 0.1915430008568644 0.5022444544785454 0.5988591904831349  
0.9070902147265140 0.1604294008226963 0.0803797411828638 0.1983756189347601 0.6319698819595029 0.5847560627906170  
0.8833216104155334 0.1580292773206494 0.2708141243385848 0.9919189295418278 0.4509659557562233 0.7916785142970517  
0.7553760202012357 0.1590674442398166 0.2486463811938981 0.9977025751029662 0.6538109117923999 0.7911472276787257  
0.6985546406043310 0.0503233184743346 0.1859689852354391 0.1266943507605443 0.5591322647153684 0.2583344692717018  
0.9241119153627504 0.0505474109992354 0.1800603166626607 0.1907117008705994 0.5607571694110245 0.4257736567303199  
0.5849921555029532 0.8729196662460380 0.3891391030516616 0.2990131804417456 0.5581621506365586 0.5308255232861967  
0.5909617055972547 0.0019094922204627 0.4142309783317693 0.4018615045780042 0.5619251327870163 0.4151494219898910  
0.5990280488362151 0.1314778254524975 0.4283335224988284 0.3828959054910094 0.5416958720506280 0.2273799723948700  
0.8091018498225858 0.8707418528761115 0.3840082569740232 0.2554384732368481 0.5500849242871412 0.2604107817524136  
0.8084569470796322 0.0009744519861027 0.4003478531084029 0.1252057307528934 0.3421325798807419 0.2635609344306804  
0.8061930329746130 0.1298241521167705 0.4224903600314160 0.1950011217343172 0.3401281263697711 0.4225307944793186  
0.0030660770313758 0.9477129381847108 0.2063586891671088 0.3007924986321538 0.3456636041588877 0.5313436405560359  
0.0043157413834919 0.1511460323045225 0.2058918399141023 0.4026894513965022 0.3323702740575712 0.4126838952161356  
0.8724205698309161 0.0594973099115059 0.7414483369978152 0.3812407957764345 0.3567064174135864 0.2246109200149375  
0.8061509060159748 0.0523507146466064 0.5783530714653481 0.2540880436634114 0.3556529261776625 0.2508853485363411



0.8135976546009043 0.1743722666563381 0.3211701014866138 0.1919925286521271 0.0031351492033969 0.5962089222474498  
0.9214730248040037 0.0571084397129871 0.8330510545372302 0.1985425673194093 0.8726452608687844 0.5909097621277042  
0.8066453959100341 0.0304083804525484 0.6892767884677905 0.9955353746651706 0.0496791701870875 0.7940898274195508  
0.7802654043326736 0.0605839887045527 0.4658780296053798 0.9953990139033122 0.8483093866012413 0.7932142899585086  
0.6234382712021382 0.0616037495447697 0.4744562851928453 0.1258700366617288 0.9414920668979654 0.2620206495888225  
0.5716880996319562 0.0299996713105422 0.6888193240261926 0.1911721388749505 0.9404098762947083 0.4274237603939181  
0.6867060174826793 0.0608564551322926 0.8291191489421836 0.2990374599077168 0.9453374032068997 0.5340942681309874  
0.9222547216926732 0.8273691752128475 0.8250793674394423 0.4036336542113525 0.9355415953007404 0.4216102923684806  
0.8074852279431393 0.8715945307909865 0.6858759747656007 0.3821092500519259 0.9430467112314110 0.2301688121963485  
0.7763986229710991 0.8274652369951695 0.4679507003304318 0.2552323229501028 0.9501595262401947 0.2612187046717975  
0.6208751190736926 0.8280716083016294 0.4716933533574865 0.1248426330371303 0.1601742992522439 0.2714014347141225  
0.5690905588022473 0.8715901840101393 0.6850437498949908 0.1858938621143320 0.1541369104043566 0.4376313991461770  
0.6862027502859266 0.8264530034566613 0.8193403850449124 0.2988238223166745 0.1548499250744145 0.5311618312320291  
0.4232212729220304 0.4402824156823276 0.6579457722567152 0.4024829172132203 0.1628709241249387 0.4175389786511347  
0.3081643818211308 0.4698970721869050 0.8009611123830283 0.3908277132871278 0.1571171852029776 0.2244062068014492  
0.2773404931684164 0.4420807617854381 0.0228317972639278 0.2552523538319983 0.1532951519184368 0.2736763315118680  
0.1206995182036432 0.4364158650086046 0.0267095574270134 0.1831409309599554 0.0501300841197394 0.3224932700546747  
0.0671036604393600 0.4715718069289335 0.8158050523914617 0.4175496564676222 0.0483169064223304 0.3285929882380143  
0.1839752388286769 0.4400795691272398 0.6731514220472216 0.0844205699546450 0.8703495540635147 0.1123664330196417  
0.4232583545516777 0.6724688087382277 0.6749552653258115 0.0935921168806825 -0.0002532586015832 0.0938778288224346  
0.3084196255129911 0.6265972847551033 0.8127102409737343 0.1039804976468829 0.1293608173107803 0.0849640521833548  
0.1181199988873030 0.6708565870356171 0.0344244404353620 0.3036956142972856 0.8707998330604697 0.1251145365357800  
0.0700135379168425 0.6299475223810183 0.8194073416595163 0.3068545732686085 -0.0000865203988892 0.0985772475883007  
0.1873438259116304 0.6747431663964241 0.6856158778928181 0.3000949984450301 0.1290198479718187 0.0744278842021742  
0.0772798060292078 0.5568456822020851 0.1675388978000285 0.5019747248049881 0.9508644095687053 0.2975516978278427  
0.1879352177043275 0.5289691779205901 0.3192332481314242 0.5049716358102514 0.1432935272574859 0.2973932701673112  
0.2203394417398364 0.5633713500336550 0.5373429887325551 0.6266317555954860 0.5570706505697466 0.2481712022067812  
0.3775889296677494 0.5636347575868665 0.5289891442015023 0.6893925465925967 0.5560723123078113 0.0796980940055111  
0.4309222395795343 0.5250934420064737 0.3204565967346332 0.8002169551886760 0.5674711090874911 0.9812238485976853  
0.3122000340948200 0.5509884599713892 0.1813489870497561 0.9090067749345888 0.5593845615326662 0.0827920958091947  
0.0778254327687673 0.3258520633663345 0.1732581354983521 0.8845465726565641 0.5454370334213234 0.2707012535953681  
0.1898664765392485 0.3716053759818227 0.3156020619590728 0.7561943627999448 0.5458076824211958 0.2428526761281797  
0.2238843746095589 0.3267901187716280 0.5317106484124285 0.6252146724818257 0.3373505304393797 0.2388611034001175  
0.3771906176480735 0.3251983626559330 0.5247937841107948 0.6967309913493632 0.3411533464163884 0.0799863454922914  
0.4294954347329619 0.3690525384297523 0.3157707922743102 0.8035530361539137 0.3445571480499811 0.9704290266524410  
0.3121898118637905 0.3353343450309343 0.1766499009857468 0.9089816689605159 0.3308527551493390 0.0805260693250775  
0.3738215363465179 0.0582869090124497 0.7549494738667168 0.8836335778395342 0.3399357693752189 0.2682162127404278  
0.3111720457398211 0.0501010657067111 0.9219455721135126 0.7546980856461433 0.3476041929371850 0.2522579499637621  
0.2006878059726631 0.0523155051171579 0.0221620507516741 0.6835479111286406 0.4472234230486589 0.1878020971847325  
0.0902647654536553 0.0614755398475041 0.9240645299890053 0.9237318592678074 0.4441313744711993 0.1679690179438723  
0.1166094692786311 0.0530972247142848 0.7342030323853374 0.5779074414245108 0.6345815472938541 0.3869062865499453  
0.2445522391676907 0.0536254329102270 0.7574652640025890 0.5875517048905633 0.5069303077135227 0.4211516655055598  
0.3737344628765520 0.8358007778965494 0.7703351781695528 0.5878880660210570 0.3656719182526674 0.4228995356796236  
0.3080727677392960 0.8542526039566875 0.9339464406549685 0.8131683940791712 0.6314232760643416 0.3613410523335978  
0.1967527557451942 0.8398972568114513 0.0279485311364415 0.8067492818589269 0.5040894219181594 0.4126259117387274  
0.0881749646753156 0.8363145783702350 0.9253484476545224 0.8138450129516173 0.3728292000845921 0.4216649804900597  
0.1171624587881701 0.8452959130277355 0.7358983410537109 0.0049607001014986 0.5425421831061675 0.2108994161582592  
0.2441526298744034 0.8413538565310220 0.7676120856840165 0.0050464085814195 0.3471178745131051 0.2074115641515899  
0.3136451652676146 0.9480272252085870 0.7991079328073718 0.8652271084067684 0.4362182929510628 0.7535504423849951  
0.0734821662352738 0.9488889240807410 0.8323698450576921 0.8095445338279031 0.4439291009548652 0.5826201328298195  
0.4155728388358123 0.1273509438388905 0.6028818770681389 0.7049332522973868 0.4341777597550434 0.4708738500527963  
0.410835588691158 0.9978965253857858 0.5900428817667894 0.6120950274629589 0.4370544363669436 0.6043900819031609  
0.3977789931896464 0.8682922743882940 0.5847070765666967 0.6117472464579162 0.4494956407506080 0.7929228573232437  
0.1894188790738566 0.1317214723447011 0.6278283581751536 0.7341522446486437 0.4389196411323320 0.7383082143322041



0.8744305865545944 0.6516814056106529 0.7407921224912941 0.9000666041015111 0.8666165311929389 0.9234980537338076  
0.8091825459114562 0.6421414352190609 0.5763732644235622 0.6894139024049074 0.1299484193319454 0.8878578740891192  
0.6927740465569093 0.6552046199435212 0.4690703557929115 0.6962705262185446 0.0006408509682077 0.9050666103338364  
0.5851681600032264 0.6605817388469511 0.5776214544198579 0.6947306867569636 0.8707248646376606 0.9174726649104814  
0.6175110339802586 0.6575956901739848 0.7676542636335173 0.4978273342588865 0.0560522889588551 0.7037096653169246  
0.7458292256705848 0.6574765339385117 0.7469244761539068 0.4953189850268936 0.8489099673490541 0.7099173085130948  
0.8036438917993142 0.5458870370293915 0.7080280554634829 0.3732227980038584 0.4393917448988807 0.7497266964778271  
0.5751949047119204 0.5508923038045509 0.6807655431581405 0.3096597229894488 0.4495619022916693 0.9155995385571111  
0.9197180555372348 0.3716406313141821 0.8978307244400052 0.1990854643386403 0.4397308538395061 0.0148111158682641  
0.9020006846374254 0.5012243936424099 0.9111842884354919 0.0872746132921156 0.4396507617349444 0.9201764802844066  
0.9053978839196873 0.6323167356854047 0.9269388852064453 0.1145629223189373 0.4439235450304940 0.7299551043822968  
0.6892643899327024 0.3709263554980051 0.8915991405094424 0.2432237734701952 0.4392742635717654 0.7516382884388598  
0.7036960992792255 0.4999342606129858 0.9062130217320048 0.3722772187953708 0.6595409246069115 0.7628009503994310  
0.6928583397342143 0.6293041141466629 0.9205025530856809 0.3099847610346788 0.6377691096975315 0.9279075875921902  
0.4977134667979922 0.4461787309401117 0.6989352592956132 0.1930005751601181 0.6500167748416281 0.0420917946481493  
0.4945881824439631 0.6495146877477184 0.7134549713381402 0.0907837608836228 0.6595516947244578 0.9241531550577252  
0.6247847343644977 0.9498170037589596 0.2431078771896267 0.1173752344773116 0.6564537229239333 0.7332012962312813  
0.6892870638186613 0.9426508011817700 0.0778757120379290 0.2438956371818035 0.6595214921205323 0.7647152487791122  
0.7985059198268886 0.9380628610322843 0.9755734376219657 0.3084099354058488 0.5485939303127200 0.7855015885365125  
0.9068701362289940 0.9413395213857866 0.0791559033628285 0.0733330644567903 0.5504843046495785 0.8229309109374322  
0.8824951020452502 0.9437949900070410 0.2686888267249285 0.4189748052199818 0.3722367835869123 0.5969750126443562  
0.7543211512336828 0.9430446454557743 0.2446637978520364 0.4093733728557810 0.5019284399274048 0.5865666403819518  
0.6257521772409158 0.1522944588110512 0.2400470178369427 0.4026049114104173 0.6315788080732252 0.5774611317302145  
0.6917609260195311 0.1580211097848049 0.0768384444176830 0.1858137794416017 0.3726194158908569 0.6099867168149984  
0.8016186336357408 0.1542137419462265 0.9751965029113030 0.1915163468176099 0.5024695108001342 0.6001538140213415  
0.9088983508481012 0.1609040085116359 0.0795473289567050 0.1987682852682326 0.6322802975772251 0.5863442518533345  
0.8830158796945253 0.1588712659064200 0.2692740682695017 0.9920224099851271 0.4512423507044259 0.7916738243114948  
0.7550391050962901 0.1600363373983137 0.2444649313232150 0.9968758076749467 0.6533400970047865 0.7926940143918696  
0.6973760863805371 0.0509663885039632 0.1860115986347871 0.1277427932799658 0.5596577799905940 0.2588007080541875  
0.9240714298816394 0.0509747338769421 0.1796138750437207 0.1910499860334315 0.5609646548303980 0.4271656390390678  
0.5857899450422966 0.8730588446572016 0.3890219183935962 0.2991278704350727 0.5581525735244351 0.5326839218697795  
0.5902721737796639 0.0015285910247105 0.4150502281730757 0.4014855776426789 0.5621491485882830 0.4157825419486280  
0.5986262397374666 0.1308919979054343 0.4291824277943324 0.3831186110402836 0.5407364126183573 0.2274532827258033  
0.8088956905896743 0.8705196059563752 0.3800529227294066 0.2562620014197864 0.5468792479101866 0.2629557706576353  
0.8080155045463790 -0.0003771205778143 0.4024970711052092 0.1266216127310665 0.3404843914289051 0.2633636044794153  
0.8048790731675308 0.1292291135170211 0.4181887402470421 0.1959111636094024 0.3388664794324456 0.4227059464589645  
0.0031229084158311 0.9482552026301863 0.2071973691265268 0.3010058701262929 0.3457047917380530 0.5327260951432010  
0.0044681600010776 0.1509502073677987 0.2078346936669735 0.4024416674332799 0.3319464702747134 0.4129471535889034  
0.8726264770383586 0.0573941298735109 0.7400454023988494 0.3814992591695195 0.3566866447295367 0.2245854904234992  
0.8063028379889753 0.0558761423382277 0.5771121605830793 0.2548772475873739 0.3585811361012762 0.2518272160924869  
0.7015091030823440 0.0572231342817029 0.4644119134357992 0.1801966975163245 0.4503745772565236 0.3267494365297611  
0.6018242893435320 0.0587626975956088 0.5877058183206713 0.4330192134800590 0.4470572199969238 0.3402457327168084  
0.6155247616196935 0.0559372416203527 0.7791090444730862 0.0753366741860613 0.6261708116561404 0.1103846505630533  
0.7431858662055625 0.0595191816721702 0.7456826191257135 0.0969629620233714 0.4976107620892251 0.0936283636396143  
0.8739405906263904 0.8452599113834436 0.7354049221853189 0.0997600879554385 0.3675384686536279 0.0772031340303150  
0.8071679065370307 0.8498117980280181 0.5723661511900709 0.3141598277951246 0.6293199209151608 0.1363448448733934  
0.6984203109775138 0.8428842815850741 0.4716287006042834 0.2978081625756596 0.5068803413583944 0.0872971579999710  
0.5909582487857918 0.8453005686708966 0.5784924123913282 0.3048087194943141 0.3768747958635713 0.0749931309298903  
0.6168156529825054 0.8423836683487876 0.7685544429840848 0.5019997625812119 0.5530591075232630 0.2920582905232795  
0.7446920031184073 0.8408280633307151 0.7421711587047586 0.5003192876410332 0.3407096885070094 0.2849262892652547  
0.8041560581979429 0.9510091811445818 0.6941741674707574 0.4241990255330874 0.7494828984149714 0.6458397709202037  
0.5730396500690446 0.9507994168394015 0.6858864554394880 0.1887770816375869 0.7515916218234563 0.6552990858235700  
0.9148430059243792 0.1256574737642651 0.8926224557169610 0.2921314549567527 0.7518240011540630 0.0538744141187052  
0.9033666395214532 0.9964164259174522 0.9048324103504287 0.1064304766214467 0.7476656380626046 0.0629493195753976

|                    |                    |                    |                    |                    |                    |
|--------------------|--------------------|--------------------|--------------------|--------------------|--------------------|
| 0.0795301535596946 | 0.2485963014995480 | 0.1460169275623145 | 0.4271421379041431 | 0.9691010385421515 | 0.3173502613516015 |
| 0.3102477729369967 | 0.2586332109393475 | 0.1549635652174132 | 0.3114596451624251 | 0.9422682504501679 | 0.1755162110325173 |
| 0.2132139444258649 | 0.2506734952572552 | 0.5620141331911634 | 0.0785346721703729 | 0.1722301878048476 | 0.1754088807318211 |
| 0.3871644140099717 | 0.2494944072692784 | 0.5589429868294015 | 0.1895561299190408 | 0.1292467000646333 | 0.3209651449494692 |
| 0.5752138373366749 | 0.2459930063669932 | 0.3525610539241128 | 0.2218340808832022 | 0.1734152470682741 | 0.5354414209646202 |
| 0.8098811717885394 | 0.2508488360754111 | 0.3540448230697845 | 0.3757336234485470 | 0.1738364940014215 | 0.5276293303428856 |
| 0.7150529229375726 | 0.2500158826462041 | 0.9448155783867231 | 0.4313681400537026 | 0.1263266652809015 | 0.3222337053969251 |
| 0.8886878165414227 | 0.2478843988433625 | 0.9380800444662731 | 0.5733447931625378 | 0.5628307860750443 | 0.3363579992630035 |
| 0.9183183448938216 | 0.7497932424053481 | 0.8500513599146140 | 0.6888634288094866 | 0.5295778373417631 | 0.1910920195335014 |
| 0.6877335025883237 | 0.7499207182796247 | 0.8525888093022249 | 0.7212272917255560 | 0.5646868073461456 | 0.9709735553812978 |
| 0.7921836507693906 | 0.7525046971961535 | 0.4405001319347651 | 0.8784319043800408 | 0.5652295526158988 | 0.9707047245850156 |
| 0.6060737873714501 | 0.7523402688535379 | 0.4459019257738749 | 0.9304544077660426 | 0.5236234542100698 | 0.1784313528859202 |
| 0.8443622338802304 | 0.7291685674148742 | 0.2418431134398272 | 0.8145924123487202 | 0.5546193975871905 | 0.3227669924367774 |
| 0.7749819681567125 | 0.6714828583896412 | 0.4706709483614184 | 0.5724604803211892 | 0.3255383620637670 | 0.3235883463066043 |
| 0.6217170715906504 | 0.4367775526694497 | 0.4661845582557186 | 0.6906808806522465 | 0.3705542503465381 | 0.1898099091501377 |
| 0.2731337409246348 | 0.6714098613328708 | 0.0284793978197069 | 0.7259083806016570 | 0.3274889823677370 | 0.9712916036128835 |
| 0.3041816113303048 | 0.1761566046003403 | 0.1779653181873810 | 0.8794642223881293 | 0.3243736243114783 | 0.9695659564308109 |
| 0.8319037513037438 | 0.6655565344318221 | 0.3107110253161121 | 0.9296918088512867 | 0.3665801733223144 | 0.1793050931652367 |
| 0.4223760356817226 | 0.1718235775336526 | 0.1757398629355118 | 0.8142337748154532 | 0.3282662546658887 | 0.3224928013050787 |
| 0.3406693894142852 | 0.6600544544369574 | 0.1733572637754133 | 0.9198895473495023 | 0.4412296373515016 | 0.8361979295048112 |
| 0.6562071974768086 | 0.4256268693469625 | 0.6265724586530784 | 0.8041805812777094 | 0.4681311676364809 | 0.6933527285082554 |
| 0.7191832986586961 | 0.7085228006501989 | 0.2180297450494869 | 0.7812083381865461 | 0.4376734464050848 | 0.4696688077790994 |
| 0.7083777933844100 | 0.7592862778533191 | 0.1142090493553555 | 0.5703364693484710 | 0.4729956929041622 | 0.6958255432719642 |
| 0.7362768361848668 | 0.7935450633349292 | 0.2250582732780063 | 0.6853913292219476 | 0.4412083636625751 | 0.8332307912496942 |
| 0.8121984698415637 | 0.6902466122266491 | 0.1037279462007961 | 0.9244401074421900 | 0.6726520790948330 | 0.8241642699313231 |
| 0.8313579364396614 | 0.7754480653756789 | 0.1027896243128072 | 0.8083318957878549 | 0.6261158805544230 | 0.6896588881837115 |
| 0.8229488254591234 | 0.7576348964697613 | 0.2873177903549514 | 0.6176630407063913 | 0.6747534047965035 | 0.4644966628973948 |
| 0.9869784830155698 | 0.7631953204183332 | 0.4623351940932907 | 0.5706141091934812 | 0.6301574109582402 | 0.6793697846993335 |
| 0.9772258908557756 | 0.6692414477291698 | 0.4266756858739721 | 0.6863979370794054 | 0.6734963930033131 | 0.8198684640416096 |
| 0.9769479740737588 | 0.7938982956250803 | 0.2888158864384409 | 0.5767661112202271 | 0.9440242441484116 | 0.3354202696461098 |
| 0.9736197999530180 | 0.7024082386820547 | 0.2497203966668750 | 0.6920104328456625 | 0.9714446188867187 | 0.1871862244408266 |
| 0.7394175892740373 | 0.7503929507386130 | 0.1768999345471652 | 0.7202661468129687 | 0.9382976669179895 | 0.9673699678702120 |
| 0.8089614230125036 | 0.7362414120801157 | 0.1481407154802119 | 0.8774770312043403 | 0.9363672533121618 | 0.9694734557411337 |
| 0.9811955334180577 | 0.7232297150866361 | 0.4050653179034125 | 0.9300600003572637 | 0.9720289036315739 | 0.1813973502494329 |
| 0.9799330924546964 | 0.7401434894821536 | 0.3089485952850613 | 0.8140088852687347 | 0.9418959534618946 | 0.3242547055690030 |

**ETY on BAS (T2)**

|                    |                    |                    |
|--------------------|--------------------|--------------------|
| 0.4239609166602032 | 0.0587653913455130 | 0.6610267551704281 |
| 0.3095170157038189 | 0.0269408449837943 | 0.8056193718691398 |
| 0.2797687782366550 | 0.0597817181582462 | 0.0271519880331016 |
| 0.1230884542143291 | 0.0616192059889905 | 0.0291505296128053 |
| 0.0696886301983669 | 0.0283029674290969 | 0.8187076709436827 |
| 0.1856926778438835 | 0.0599419126690057 | 0.6754703590028370 |
| 0.4232125613172689 | 0.8264095060953750 | 0.6757827510130959 |
| 0.3096759352874615 | 0.8695939246775121 | 0.8153585751711520 |
| 0.2760285895135993 | 0.8287936937279340 | 0.0326104307879282 |
| 0.1205356651742476 | 0.8244676499647915 | 0.0300692152897308 |
| 0.0696392534953605 | 0.8702113761161798 | 0.8198397406666836 |
| 0.1878669854998679 | 0.8273130283319856 | 0.6856833377603212 |
| 0.0781706967636578 | 0.9408226328957892 | 0.1665664543485512 |
| 0.1897411637463840 | 0.9707923180506947 | 0.3161674675844985 |
| 0.2207022988331926 | 0.9396566743038661 | 0.5351417439903025 |
| 0.3775675961470533 | 0.9366396598179121 | 0.5305336834377654 |

0.3078179443938355 0.4699712821012828 0.8004432062811744 0.3917246295755113 0.1567435393073622 0.2223458615524656  
0.2767323320744277 0.4421657962478066 0.0221127398390557 0.2554853685861820 0.1523962870925767 0.2682328481855994  
0.1202030821144043 0.4368427904175857 0.0254876625849780 0.1843168498777076 0.0496691319778738 0.3223413323959461  
0.0669454677105726 0.4717406356581034 0.8146837520821550 0.4192214544498682 0.0488939869328363 0.3280104647586783  
0.1837986571193861 0.4401104318702045 0.6721071764463213 0.0851228683463043 0.8710676394287116 0.1102780166128976  
0.4243939738202983 0.6724724547879815 0.6715429263838152 0.0944256869136668 0.0006488560986417 0.0922447962357097  
0.3098281867512071 0.6267204992474096 0.8098200348666965 0.1033456539138091 0.1304329128665181 0.0812702599035176  
0.1191549003592218 0.6716587549514014 0.0330170811345626 0.3049563184941503 0.8714865287822477 0.1228830034575099  
0.0705751526487234 0.6300842369204849 0.8186291863294577 0.3062832123030757 0.0005386501809720 0.0962916278483602  
0.1880378647291523 0.6744285729426366 0.6833982927514404 0.3020755246875312 0.1291862511349436 0.0697767009898249  
0.0767838438812314 0.5575282342164930 0.1656323163781591 0.5026742573923612 0.9512314270600015 0.2956681935102463  
0.1883181841129156 0.5301420680777371 0.3160326266883101 0.5054844817915879 0.1451666811678096 0.2960233973140293  
0.2199810782887782 0.5628798826374900 0.5351363177919499 0.6251015617929612 0.5580534756243291 0.2455029022688155  
0.3772033975549987 0.5636318896090886 0.5272809563369040 0.6911151606735877 0.5578270906088061 0.0800894479208245  
0.4303613788635404 0.5250400435908115 0.3184095885858818 0.7998142908656241 0.5672000197212818 0.9761054501268914  
0.3118686217688719 0.5524991947160180 0.1787333405473125 0.9079819977110544 0.5605935136056769 0.0797629242741011  
0.0770656613932349 0.3265445822850343 0.1730709294650778 0.8835755595563328 0.5464024389615237 0.2675830971149809  
0.1896456415969173 0.3717827567976933 0.3137751799701173 0.7543440436173147 0.5535112893588084 0.2478177156307052  
0.2236608555448323 0.3272451354423443 0.5303610838721858 0.6242728991199793 0.3410959085559143 0.2357630664070392  
0.3772742781481618 0.3254255475700822 0.5237409552684940 0.6968713813470752 0.3437891191385830 0.0785435346605316  
0.4292356329018033 0.3691210151511516 0.3141284451010378 0.8030103379944152 0.3451572871675547 0.9679493660708312  
0.3118765047011319 0.3342146897978790 0.1747921421484787 0.9070035864794088 0.3306215120811210 0.0796740873599095  
0.3735048715144232 0.0573430447777085 0.7519440425529856 0.8826781160420183 0.3443798314331508 0.2681281927965121  
0.3106154982459392 0.0487893623486672 0.9185788838940097 0.7538830933161867 0.3473059969850311 0.2514058777178661  
0.2008410213912755 0.0539854360577140 0.0195763319132857 0.6874686464391239 0.4500709656166734 0.1892836674853776  
0.0905701256087421 0.0615483797908797 0.9214757676491838 0.9251068683644570 0.4451938203024925 0.1628629079443925  
0.1163286154887217 0.0538108329108450 0.7310412512454816 0.5745403067869629 0.6362409050402669 0.3832538587425838  
0.2442238457498916 0.0544940225229812 0.7540212367665350 0.5865479688355466 0.5088592401183909 0.4192683987526931  
0.3743429278563475 0.8363767050484696 0.7680035237411752 0.5863605760325216 0.3675178059438042 0.4197090189993203  
0.3087962481881656 0.8555870594159098 0.9313083198837558 0.8187129946364732 0.6287883516132581 0.3740108551812333  
0.1976442692475258 0.8410309142599277 0.0256894903055638 0.8082739812559248 0.5007756228817091 0.4079600560163856  
0.0891005530140154 0.8371171733493565 0.9230793083489435 0.8112910757416510 0.3705538988059968 0.4228748729698193  
0.1177042102626399 0.8446537542009774 0.7337044287966829 0.0039697853067186 0.5441483175604389 0.2079602374337368  
0.2447958774480518 0.8387756876542420 0.7657794983000411 0.0034430967034749 0.3456653133681865 0.2055632032009063  
0.3114768244612601 0.9477398024760025 0.7937419310656841 0.8658699015508303 0.4367618990750620 0.7501971197695936  
0.0748584959885272 0.9492148124386164 0.8286178516061972 0.8086105222007842 0.4448113871465511 0.5807987216158969  
0.4159839552548011 0.1272533098957913 0.6011326158829582 0.7038522926221982 0.4360956855941333 0.4684460072248002  
0.4115439227843413 0.9977848801988333 0.5868472467599165 0.6095103956027974 0.4349274435386107 0.6010469926035401  
0.3980515848566168 0.8681493892488926 0.5819667508157637 0.6116512080709646 0.4492018983086312 0.7895269844292503  
0.1886660616802532 0.1313010973780452 0.6228452032632743 0.7348834543503329 0.4404983860764408 0.7390858864535547  
0.1917574238274221 0.0022621572882045 0.5940556506151540 0.8760433766026896 0.6529617101517026 0.7361386222951286  
0.1995623545663092 0.8719988858562394 0.5890981351540193 0.8067129387834383 0.6438467323166713 0.5767045867142911  
0.9957090580626304 0.0496762944677289 0.7922251669719903 0.6922380514860872 0.6528102440255610 0.4571772294512534  
0.9959912383048825 0.8490278445772647 0.7910420946162946 0.5898640403394629 0.6601366630307312 0.5745185093193111  
0.1264380385376001 0.9416440447341774 0.2601384422587439 0.6186442645945377 0.6555245348688183 0.7649150930285498  
0.1918285361678654 0.9391780563629745 0.4252206857904249 0.7473789833171519 0.6587967778911018 0.7483429883000716  
0.2994888598737990 0.9453397290784183 0.5319653980715101 0.8047032604569175 0.5468198166494452 0.7065679051921899  
0.4037305871573646 0.9352907884143591 0.4186089730447032 0.5755965842659706 0.5500387427470664 0.6754430406478223  
0.3827841800560463 0.9447074315673865 0.2274422241737021 0.9191763603638576 0.3726378827760521 0.8966524932982063  
0.2559107218167309 0.9498838469425019 0.2593147885985324 0.9024174171854407 0.5020781241799295 0.9082659988774752  
0.1247428271422167 0.1584360604981916 0.2684882316116000 0.9051503976407953 0.6327463836886946 0.9230214234658837  
0.1874368959588453 0.1554562749966833 0.4332436799936625 0.6886051136215848 0.3717324123176248 0.8899785947759308  
0.2992264721415269 0.1555251043109564 0.5302043707863576 0.7005263366233450 0.5008950184124400 0.9067308977066405  
0.4027544961964484 0.1634477050940989 0.4160210362048190 0.6925126147744357 0.6303053545377534 0.9197337626761336

0.4967880734592470 0.4469251322703367 0.6990308622127651 0.1942289169329615 0.6509006520105267 0.0397137903400629  
0.4964780480421663 0.6498342552679431 0.7066453057819988 0.0910857578522752 0.6599145425058215 0.9232665757656098  
0.6257482859897030 0.9489822449053712 0.2425590371264158 0.1185861601111717 0.6562102844019884 0.7329060155280310  
0.6909844323186329 0.9412806770712185 0.0775628768221530 0.2459963747084213 0.6600892216524824 0.7600519444121273  
0.7989083994745926 0.9393197955510771 0.9716781062183368 0.3084806191985496 0.5484841123628859 0.7844808893824381  
0.9059918075561689 0.9403621701909358 0.0789837287995842 0.0735290959891863 0.5506660995117388 0.8228807454235779  
0.8835622392257446 0.9457177880835757 0.2687953113719762 0.4185761719150859 0.3724807975747546 0.5964483763689853  
0.7552645941426971 0.9449985105650667 0.2452505849356468 0.4084363704157818 0.5022387284067817 0.5863258681405066  
0.6259741042957788 0.1531500045639464 0.2369195818234956 0.4022991551139435 0.6320229372001966 0.5743109287715026  
0.6927386581330800 0.1587765463261894 0.0749790426666019 0.1859573285957242 0.3722843271313167 0.6101183840524057  
0.8014244301390799 0.1551822287310126 0.9704035032185921 0.1912756232608188 0.5018438650337965 0.5978074474700489  
0.9072895733422133 0.1625412538740432 0.0783459280109818 0.1974665348945584 0.6315804050534416 0.5840508906657089  
0.8832761111759684 0.1565386592542554 0.2686410990206086 0.9921208583293157 0.4515614779360804 0.7896985069933569  
0.7555112664003246 0.1578255541636562 0.2433030590520140 0.9977978817477002 0.6537860606541227 0.7901854646757389  
0.6955895795141060 0.0507616076401897 0.1817901564545481 0.1260052886198745 0.5591690999497230 0.2585803040137964  
0.9256395669156989 0.0513380118018758 0.1739443879317396 0.1905269015963686 0.5606652962312638 0.4251143585346881  
0.5853756370268118 0.8739585750502611 0.3894750729526515 0.2987014735930888 0.5584090752466365 0.5310609817250519  
0.5907977225738364 0.0029030814075391 0.4128300942888237 0.4007405828335109 0.5614738712628099 0.4141893206531343  
0.5999578689928957 0.1324042944832103 0.4262977778600606 0.3820160033534778 0.5406678538104788 0.2263999605851262  
0.8105965931130215 0.8729188571792744 0.3823761578734903 0.2547977168228457 0.5525108527697423 0.2590092366101171  
0.8092386245002414 0.0023634772996291 0.4010314529129499 0.1240527747177728 0.3434852626646073 0.2645185648898730  
0.8045263559712872 0.1313082853514910 0.4192621070200341 0.1948515407381423 0.3411740850505258 0.4223827422072492  
0.0036937719908652 0.9486982766144695 0.2050664897795366 0.3009163742350342 0.3456414291866597 0.5310144292631450  
0.0042037705500625 0.1527403754979195 0.2044749353994413 0.4029034657323974 0.3324642871387196 0.4121902107810004  
0.8725954058248796 0.0582800535229340 0.7406639409168669 0.3798690493534480 0.3576304294100093 0.2244706889636141  
0.8065422229886836 0.0563899948522546 0.5772802404861215 0.2528787079545095 0.3531975910635692 0.2495300309057704  
0.7018258799803473 0.0577257212822578 0.4647813904010863 0.1849217071368515 0.4511615799820209 0.3208576214363593  
0.6005283723143648 0.0611798100363798 0.5851759005395091 0.4335898626589705 0.4470226407655127 0.3380996544863284  
0.6155556800349762 0.0552850386132237 0.7767346646394445 0.0767966627569526 0.6275283422284514 0.1099934136959280  
0.7430801966064978 0.0595571461139895 0.7457023118021678 0.0967793115925245 0.4989084959695307 0.0909597303434946  
0.8742229537908962 0.8450857151652971 0.7340144780461771 0.0988287731527641 0.3686318741003535 0.0773681871139450  
0.8072119959941678 0.8522889819198135 0.5722213813348292 0.3166298349467280 0.6301857914118411 0.1317394128775843  
0.6986153091518269 0.8448239202468708 0.4703694725472816 0.2968001432227259 0.5070433973276606 0.0863712225048684  
0.5912859096373908 0.8428887524708419 0.5776824261765993 0.3038466233678269 0.3769311447853698 0.0744656897695174  
0.6167037485149437 0.8444978805752890 0.7677094221886230 0.5007905034491082 0.5536648090749925 0.2888146497239777  
0.7447123554299717 0.8412491947594556 0.7411568813091278 0.4993337705060743 0.3398075653623726 0.2817212437918847  
0.8050220598803727 0.9517220296505183 0.6960001674186537 0.4246628720333299 0.7497634714825596 0.6440564012070660  
0.5742265049764410 0.9512153108025238 0.6791344468407676 0.1882755661687009 0.7510342569954417 0.6517020735834369  
0.9160257400885292 0.1265108227147722 0.8919415503687316 0.2930674069468290 0.7529186724284667 0.0504200391734377  
0.9048744478644866 0.9973992885694393 0.9057710541673978 0.1079799951808677 0.7486256674141594 0.0609916892381411  
0.9010023025737122 0.8674657097887298 0.9216888575180778 0.0816630105804456 0.2494436636762730 0.1459494262513014  
0.6884578181173965 0.1306097100781005 0.8860148949295303 0.3127217349860239 0.2578289617451051 0.1507947165516035  
0.6950913943445455 0.0012644438308268 0.9056589628683905 0.2128806381040907 0.2509735172514474 0.5593982329936460  
0.6951290114713337 0.8711719016135251 0.9160562137513101 0.3876191582494806 0.2497975116412452 0.5579287052182617  
0.4976199862591282 0.0550629536217869 0.7026560601402747 0.5770192598964832 0.2476052426291900 0.3490195320195709  
0.4955113408493487 0.8500546038220280 0.7077265934353005 0.8112918247340076 0.2507591363216708 0.3490690274118990  
0.3725200197339780 0.4389995865037328 0.7490677956051592 0.7140925606063342 0.2510311331099323 0.9437922954971500  
0.3093374813041182 0.4497944967188233 0.9150181120410156 0.8887530173979726 0.2487361431891074 0.9351576334991624  
0.1984758498357270 0.4397929428641556 0.0134489814971782 0.9197161772313561 0.7503465713775506 0.8479233879740944  
0.0869176686548456 0.4393940135412305 0.9187129810069701 0.6861032324914436 0.7505147777539178 0.8497462737505821  
0.1142575606584306 0.4445773987403387 0.7283680705468289 0.7930618521698448 0.7536788805285911 0.4478857574925465  
0.2425703491669692 0.4398615116812131 0.7512088343143747 0.6080428564150921 0.7526462903807339 0.4427106831145919  
0.3747490302043602 0.6581377021964328 0.7605372715186378 0.9179678884865626 0.6947150877094372 0.3863680944942913  
0.3106904247071184 0.6387744214078644 0.9247638320308058 0.7726877368657495 0.6722143802342130 0.4702366775019410

0.6206756393970426 0.4382959129408212 0.4629141950392054  
0.2743502198154439 0.6724974048881888 0.0256447843599564  
0.3054835855281817 0.1755492531734638 0.1739488623159424  
0.8662127547505780 0.6531116296407868 0.3750642641380925  
0.4235179018527259 0.1727185244522044 0.1749584419618827  
0.3475562544110214 0.6589387839875464 0.1642451686497354  
0.6519666052507274 0.4189534217508351 0.6233105852072303  
0.9257833417940831 0.5893110272197646 0.5141637696847166  
0.0115404552639697 0.5947893022855314 0.5239060711878395  
0.9763146855345268 0.5788719053191606 0.4085775795598928  
0.9573883974407721 0.7062031340410109 0.5262245184724382  
0.0144872216634393 0.6968368755532471 0.4282013851716701  
0.8969387562867274 0.7363222839906584 0.4029419311405774  
0.9700528944586378 0.6061494963934293 0.4769934250429679  
0.9683356418483575 0.6791969486155485 0.4588005205134813

0.8040447159789980 0.4672470455822390 0.6893883082188570  
0.7816034150498687 0.4377062744592436 0.4654495588059577  
0.5704727779478923 0.4729308686674246 0.6952047143286064  
0.6864653809390998 0.4401696570832060 0.8299894847383077  
0.9229601126732090 0.6720228070019417 0.8213222586188595  
0.8082819983414951 0.6250522200204418 0.6850709098966841  
0.6186018446231299 0.6756547180947905 0.4681359395685442  
0.5692117298948332 0.6302558122526003 0.6802600291441251  
0.6872955206036896 0.6728059936304578 0.8170840575549139  
0.5753186283400822 0.9433776026473079 0.3351550673068906  
0.6895381784036921 0.9720632560239720 0.1860080896231991  
0.7195113530967191 0.9371272003644933 0.9671987213238136  
0.8766849157520006 0.9354882493930647 0.9688212079345530  
0.9293382036878647 0.9711331367517784 0.1808225874430555  
0.8128450582426052 0.9436326158926320 0.3231127704589078  
0.5770301900108210 0.1694086001644801 0.3295683457907331  
0.6908048067251770 0.1304212987811358 0.1834981889415611  
0.7245765050384265 0.1733365445502949 0.9683882809142051  
0.8783606095618199 0.1724447953780476 0.9703018864300023  
0.9299885384252430 0.1296905801752015 0.1816161494520650  
0.8127116471284829 0.1733845366869319 0.3169356657464230  
0.9212003987309932 0.0572249269265645 0.8325292905622168  
0.8063605430991799 0.0315976189430639 0.6881990791828695  
0.7809864784794309 0.0631060239014337 0.4650350028592100  
0.6242130605609664 0.0614351419905737 0.4725184092877217  
0.5716649317220336 0.0296083291789831 0.6860199827176547  
0.6860095201299162 0.0599770840486299 0.8277860192127587  
0.9215796724036999 0.8277346640607328 0.8219873871382725  
0.8067274315434161 0.8730108953563407 0.6843917840860099  
0.7717683271041411 0.8319230064332445 0.4678948525099526  
0.6183325847667346 0.8295114979014735 0.4717192965723664  
0.5677454413568455 0.8713467093807621 0.6846166561428086  
0.6856966549720332 0.8265027790805887 0.8174705132088935  
0.4223946291517053 0.4404373534896973 0.6575423470787931  
0.3077543920781544 0.4702341983083572 0.8005414822531770  
0.2759162038633922 0.4427525848257529 0.0224837988978181  
0.1193269764539957 0.4370596951629258 0.0260543240360831  
0.0662808394880399 0.4718495174532438 0.8150652304695770  
0.1833992539588829 0.4401862280435672 0.6724038239118524  
0.4238378166681122 0.6727840050516244 0.6725505981025565  
0.3091444173523992 0.6268866919307265 0.8102191964548205  
0.1179538499348802 0.6717479134261569 0.0332925924446328  
0.0696760449431858 0.6302199880721691 0.8188069686766066  
0.1872760716654287 0.6745048572744392 0.6838656829940010  
0.0756828482797917 0.5574570598219112 0.1665291026104566  
0.187799815210707 0.5297334246353563 0.3164658849515439  
0.2194346066364065 0.5630362837858154 0.5355561090801217  
0.3767856496340327 0.5637910152212219 0.5280515991594382  
0.4308398867631170 0.5268321195151616 0.3186444520437964  
0.3117895637722239 0.5527176324060775 0.1795265207631095  
0.0761443298025025 0.3267700125591256 0.1731391931708369  
0.1889416955187669 0.3714544933189085 0.3142467780760277  
0.2229292624866785 0.3270921546306468 0.5307062820459957  
0.3765649109730655 0.3259289579633575 0.5231704414349887

## ET on LAS (T2)

0.4236934799142752 0.0591074732759305 0.6604173189179922  
0.3096070389432817 0.0271613095002538 0.8057598517703707  
0.2792330565439476 0.0600029336063422 0.0270822833797752  
0.1226177242311119 0.0618522112461935 0.0290344440392157  
0.0690818337367919 0.0280649254483967 0.8187749190519795  
0.1854826222001990 0.0598302529669125 0.6758276294381047  
0.4223027424537930 0.8263509370943564 0.6768523270462038  
0.3085538741578804 0.8698629269654070 0.8154843083339589  
0.2754429431986908 0.8285967712846682 0.0324529633187733  
0.1198522879185074 0.8242579116532660 0.0296207914171082  
0.0686833311046733 0.8699533012323141 0.8195478122924289  
0.1867950338311310 0.8276660111946657 0.6855464082299667  
0.0776140289140964 0.9410141227907053 0.1662857885681298  
0.1892034724245418 0.9710422284435390 0.3158929642836982  
0.2203175476391066 0.9396997515123801 0.5349677840586554  
0.3772791262217640 0.9366527231504963 0.5305827954174642  
0.4258489890802631 0.9689571948803294 0.3173304620629590  
0.3107672441248973 0.9422483748373831 0.1751322026941406  
0.0778531228378211 0.1720690972650030 0.1755702142647539  
0.1893587803486177 0.1295211022619754 0.3208640552033016  
0.2214813884555253 0.1733344709501710 0.5355367833737914  
0.3754817447382688 0.1740545169831595 0.5268465071849132  
0.4306281496621401 0.1254649970010152 0.3220051357847459  
0.5747607879773912 0.5625337433072525 0.3355365931770535  
0.6851019990020762 0.5232756460652166 0.1837033628703438  
0.7212083725772551 0.5633153360826127 0.9691399456346246  
0.8775642248189738 0.5647760949326238 0.9702135723966286  
0.9296112378441592 0.5252863932343351 0.1781223286059622  
0.8099491929324939 0.5528550249319130 0.3151175504798315  
0.5713124765101858 0.3231950422177999 0.3246746875685352  
0.6866471857983549 0.3664641091866092 0.1855169703656505  
0.7256724038420236 0.3255664197732772 0.9687978200594994  
0.8791527084176014 0.3242483230420149 0.9693375960411705  
0.9290652910389745 0.3679724764015476 0.1787819480983419  
0.8118181122029876 0.3290101635769835 0.3179476069439297  
0.9185725712432130 0.4408809179768669 0.8346368487030265

0.4290325266594761 0.3705836050557125 0.3135434681709712 0.8024979388659944 0.3444674425755252 0.9696338598872228  
0.3114420951785418 0.3349333336387169 0.1752129823948268 0.9082625006093489 0.3320018223542670 0.0781673292879367  
0.3734716924032779 0.0576444948579084 0.7517090556252184 0.8811262685414716 0.3443867207343109 0.2657050816833063  
0.3104683868156208 0.0490986472195869 0.9186818810826780 0.7525531006047919 0.3518975040761292 0.2469219621691434  
0.2003341454437697 0.0538157281303725 0.0191388173549640 0.6733568348831964 0.4446016860712429 0.1774337639078988  
0.0899684243294387 0.0615505553802211 0.9214091201472651 0.9234577332438321 0.4466143275490093 0.1639878143955346  
0.1160109777485129 0.0534352342086787 0.7312375561395611 0.5810329318541381 0.6358987282844857 0.3822230924344419  
0.2440744002060934 0.0544391029123695 0.7543521483755398 0.5851679903490727 0.5081237281866394 0.4186914579786297  
0.3720561827876426 0.8349017105967101 0.7675174916303928 0.5876192643569844 0.3669380936824225 0.4183304810305256  
0.3079955874908622 0.8558476682944948 0.9313897480527672 0.7971029737637101 0.6252209182139078 0.3573527294293685  
0.1970258845463940 0.8402874399800389 0.0252600202241824 0.8107081987218246 0.4980799698963865 0.4012657374073516  
0.0886169651494010 0.8365326275222251 0.9223614715218242 0.8085279721665583 0.3684770918103857 0.4207763356333874  
0.1163622997514232 0.8449517433592981 0.7325768286827179 0.0031160781635362 0.5449520910637179 0.2101394046270969  
0.2429131595023582 0.8404194884694116 0.7664463269452761 0.0030340091087268 0.3479535629949786 0.2056564013885251  
0.3121877457100576 0.9479402635669179 0.7938977762269378 0.8653988662981004 0.4361381001624989 0.7473562029291553  
0.0737351865974010 0.9489435361631976 0.8290201397248781 0.8090323803108538 0.4447151531777971 0.5767349637667979  
0.4156810780866975 0.1277755036720781 0.6009209620765049 0.7040098602810773 0.4386517001387139 0.4659132841358242  
0.4109296267924607 0.9984726439083517 0.5856957866708821 0.6109008103672415 0.4360400665176189 0.6004240549564138  
0.3982648088799088 0.8685948733110227 0.5828881851197842 0.6120978135577074 0.4493515415355372 0.7888621286243940  
0.1885808937863095 0.1311767223046922 0.6232052421698924 0.7343342758565905 0.4388323468132160 0.7336166587222063  
0.1916412587154018 0.0022204962362846 0.5943097420481196 0.8761190276155869 0.6519016529126593 0.7313113982866867  
0.1990337400185641 0.8719205150650637 0.5886109565128956 0.8078045221310786 0.6425362753698941 0.5716109218158227  
0.9949963267037019 0.0491594480377991 0.7924377573095015 0.6934553688866862 0.6537115742638051 0.4718450273295389  
0.9951067063936130 0.8483355435541222 0.7912260913561621 0.5853179339802925 0.6608179707158413 0.5743236753220701  
0.1257994099689473 0.9418490958013468 0.2600149323770888 0.6187171487921294 0.6558456196878594 0.7636065458836082  
0.1911970095980871 0.9396402777771826 0.4251438540384808 0.7472908599780369 0.6582124863594598 0.7432382552806055  
0.2991483757294173 0.9450929877096056 0.5318754654120564 0.8040418425145405 0.5459692472351801 0.7034586101617362  
0.4031884516288409 0.9345430182608532 0.4185327902251866 0.5745357390368323 0.5502367700747550 0.6757141978646330  
0.3820823711624014 0.9441905385436754 0.2270754671634728 0.9178871318291485 0.3720262874276175 0.8944393843890590  
0.2553365479881736 0.9499893463841191 0.2591346483675663 0.8992369457390904 0.5013938330949401 0.9062184648067808  
0.1247947442585291 0.1590272378416288 0.2680775746996661 0.9016678458556536 0.6322705766581699 0.9191548241855955  
0.1870357187312254 0.1553729336108256 0.4333318810237671 0.6893396160083949 0.3711706176381185 0.8880442260564843  
0.2989569059325665 0.1556774766966492 0.5294668584764888 0.7046742967676517 0.5000954507822613 0.9011284985788213  
0.4028467873556007 0.1635917863342538 0.4154663438038216 0.6942869754615790 0.6291766806819548 0.9162202499683383  
0.3916235415261909 0.1564957609126607 0.2219219242628180 0.4971282557854146 0.4461598639533373 0.6975992575889935  
0.2554575673712869 0.1526634451628160 0.2686116665068127 0.4953716037196056 0.6496879569755886 0.7097213751830480  
0.1838655965711592 0.0499253942437793 0.3216725213591807 0.6248963981383062 0.9464809162417930 0.2428103431016196  
0.4161377493557949 0.0484589885368432 0.3287026679466864 0.6896368852162036 0.9408287330062131 0.0770071219802697  
0.0849134992434345 0.8715230478062598 0.1094477417747523 0.7981110581283510 0.9380664980678514 0.9731231931028789  
0.0936400539420459 0.0012235490957502 0.0926177416536560 0.9063627455573919 0.9397097755628965 0.0776514016544860  
0.1031993981052157 0.1308163591123636 0.0811120803034773 0.8823876057956413 0.9436251276532804 0.2670855195733485  
0.3039571242949514 0.8714044312682391 0.1228465350652238 0.7544182328414819 0.9500448565796857 0.2441074226766118  
0.3056570539419693 0.0007057128205414 0.0962305492671028 0.6261341153619452 0.1571849269594973 0.2387583744811021  
0.3010205273474301 0.1295770285360626 0.0698480685827500 0.6912549430628999 0.1611331570559163 0.0745375247328455  
0.5016274854950827 0.9526176941251103 0.2950313087990946 0.8012327628957056 0.1542264992289198 0.9731090922875646  
0.5054917373684582 0.1415429581422657 0.2960313042933211 0.9081650927702724 0.1620229136604821 0.0784388511805978  
0.6260766526783970 0.5562846936038459 0.2448608954012332 0.8830397408765216 0.1565991717793193 0.2687010417247017  
0.6857060139632991 0.5549351031965385 0.0743577309626206 0.7558571439758400 0.1529163205644710 0.2404906687854688  
0.7992680778046700 0.5664972455374666 0.9832515288709343 0.6878907334522230 0.0513318186537392 0.1779792030375834  
0.9119647281459884 0.5609094727853654 0.0759008261558468 0.9242376329761778 0.0504740028241267 0.1745621375577150  
0.8811757384733740 0.5506018449197297 0.2631607298683645 0.5810772895190427 0.8731623832357207 0.3899604807809487  
0.7551154074585079 0.5353557106257895 0.2339445436286315 0.5909915857590810 0.0015486983246921 0.4128600629628842  
0.6240909776527103 0.3320095853871118 0.2361675617163255 0.6001722330215145 0.1307679791133205 0.4267300558802539  
0.6944473152878858 0.3370124791989696 0.0759846970002005 0.8060194312147611 0.8751523995549371 0.3817986097721525



0.1225717229927826 0.0611217830366519 0.0304400317259120 0.9214731752060682 0.0589441751122326 0.8343681978735813  
0.0689800176484663 0.0282284054785516 0.8194722446490948 0.8061263719141678 0.0311179234136182 0.6932934038613711  
0.1854551015355929 0.0595746104773905 0.6770015499057491 0.7802418795793840 0.0598044790321944 0.4679019731830459  
0.4221602269922262 0.8260228021517764 0.6782481447698542 0.6232925930849268 0.0610849449647392 0.4740396147538621  
0.3085141338401748 0.8699619553493168 0.8168453117834141 0.5710613640312288 0.0301151643587830 0.6887003227225832  
0.2749384155618313 0.8278085683202788 0.0335144591202541 0.6854584853020725 0.0614283992103915 0.8298896497092454  
0.1192020099860058 0.8238326177143345 0.0305003770091476 0.9213965076029523 0.8274880746641713 0.8241110016904519  
0.0680574578880673 0.8699298100114594 0.8202730690017267 0.8064275732124220 0.8735879354750332 0.6884089920279091  
0.1865193150352820 0.8277764244640411 0.6865234064422417 0.7726627354732638 0.8321032082855493 0.4725707446770694  
0.0771239046564834 0.9405993205838813 0.1673459547482835 0.6189186890460961 0.8297636975608375 0.4736741809724290  
0.1888506920473594 0.9713223086431172 0.3169399335259042 0.5676821566323786 0.8718622641685370 0.6867998389231128  
0.2198334963723692 0.9393821810582291 0.5358065743317681 0.6855694223261015 0.8256385459908576 0.8183668324410042  
0.3769552300642945 0.9362531070421850 0.5323925856139982 0.4231253521183906 0.4397719935459709 0.6594666290484487  
0.4259934944960298 0.9684892462912703 0.3184796218304384 0.3081112979665399 0.4701854665592243 0.8016871254933855  
0.3106044764255358 0.9415984068998844 0.1766259264387757 0.2773715924147704 0.4427364117543041 0.0243922341715727  
0.0780907563356223 0.1717185173742533 0.1763816418617694 0.1206075416292669 0.4368234486257895 0.0275120687117176  
0.1892921069531205 0.1297632753945060 0.3228875536391507 0.0670274660783061 0.4715233339211500 0.8162065562124711  
0.2214236923749791 0.1731758442071995 0.5370411321272379 0.1840204805897781 0.4400395132362468 0.6736363705025065  
0.3753382098517576 0.1734954698088899 0.5276617755837305 0.4227974489236679 0.6724297158931444 0.6766184478810177  
0.4310010678912728 0.1254074368655621 0.3225032319044270 0.3078003815390368 0.6265154103397922 0.8128706692635139  
0.5762790691265754 0.5627807393793721 0.3390909092466906 0.1180995972070121 0.6712898885993676 0.0347682798274989  
0.6899472400603420 0.5263671433047753 0.1915618664639408 0.0703514510557230 0.6298845283313628 0.8195143184080107  
0.7224070565876216 0.5638261743608877 0.9725723879032879 0.1871489245806932 0.6743856872356619 0.6851007156406722  
0.8794970591117475 0.5652572550418818 0.9754041447745837 0.0767170454954236 0.5571690985451283 0.1678354497031254  
0.9299048951504082 0.5245613681307276 0.1867898808690789 0.1881582745217994 0.5293692508102624 0.3183907490700691  
0.8137375258513844 0.5557402876250347 0.3265959920293983 0.2203914484958100 0.5629326938569431 0.5368254165076600  
0.5728429925343965 0.3240957041566670 0.3274261328010798 0.3776759821311259 0.5632149253791401 0.5300427036375966  
0.6902555792099194 0.3681111835031259 0.1912866789487498 0.4323022782470282 0.5267126145673371 0.3211270456645963  
0.7254845557526458 0.3268553513106079 0.9726377797659926 0.3129323787374562 0.5521300351813785 0.1824712130792873  
0.8793179545880760 0.3255851191565683 0.9736839768183601 0.0769811846707816 0.3262435743293002 0.1739107657439549  
0.9293076351341292 0.3669765309126611 0.1855326176317335 0.1896121727295532 0.3715658714037365 0.3151381308469730  
0.8137785032994239 0.3255960582460156 0.3238735249332973 0.2234497692950029 0.3269612125596389 0.5316236572416619  
0.9196018047043351 0.4416005718101726 0.8384450648550397 0.3770419914902447 0.3254976551278197 0.5248166132091278  
0.8040247177441362 0.4664305100613508 0.6935250948105556 0.4299705232304356 0.3704419937934542 0.3156759112014024  
0.7831325348781097 0.4359471651833199 0.4695493894967212 0.3125299795236449 0.3352679507653721 0.1767777117609569  
0.5708380771829825 0.4732905145779927 0.6977962414087492 0.3727258564810723 0.0585098301685484 0.7535577828285426  
0.6861369885888329 0.4407738422186696 0.8338208756994061 0.3098708611074180 0.0496749259819722 0.9206387583466480  
0.9243883435069301 0.6721427606842967 0.8309128561812168 0.2003342708104068 0.0521761100615131 0.0229799107520240  
0.8085763403519278 0.6244746558099240 0.6933851853521026 0.0910468708432837 0.0610483014130613 0.9220434635269069  
0.6172509505287290 0.6756945522684128 0.4738164375574659 0.1157083500760663 0.0532972761360531 0.7315950349302335  
0.5672794638013700 0.6303799614551717 0.6843798609396496 0.2434466759172171 0.0535833257275871 0.7562966749520239  
0.6857875755164331 0.6720870131222688 0.8213216873833249 0.3720368120513994 0.8350071724795327 0.7690268878648692  
0.5753669364076918 0.9428218794208482 0.3357940022709875 0.3073467447582587 0.8552949950362332 0.9325309967731658  
0.6897317259182513 0.9704460848746518 0.1861753032253053 0.1964275713289265 0.8391237029342485 0.0258065388986157  
0.7194338112632652 0.9377647912974516 0.9671878637115220 0.0877002678596033 0.8373292671777103 0.9238261720519562  
0.8765239513319394 0.9370313351732248 0.9697518893331222 0.1161011458613070 0.8448452005604824 0.7339265200240794  
0.9288606120990740 0.9705237954610729 0.1825765141238422 0.2428385640995657 0.8415548553467255 0.7666724241552865  
0.8119072901026426 0.9405425765210464 0.3237208744021088 0.3127715909140873 0.9481481063015649 0.7964681237820065  
0.5776897402380609 0.1691886453183945 0.3307365454878149 0.0723376495764327 0.9489964413002953 0.8290813654655389  
0.6923376042804339 0.1287961526751630 0.1869405812163962 0.4153874774519642 0.1271381870913743 0.6018096079316573  
0.7247436664669796 0.1739869703656912 0.9715848747903351 0.4100747818634829 0.9977034797533673 0.5891142828663298  
0.8788192529108814 0.1734674265853801 0.9729101223923541 0.3979403040594547 0.8678805325511015 0.5838783692570065  
0.9301484380753998 0.1289817229590340 0.1841945070494477 0.1891042268649993 0.1311527347481917 0.6252674121171381  
0.8137309897018484 0.1709335218815015 0.3223458652747067 0.1917951864013973 0.0022526748832610 0.5950894918585240



0.1977814295456486 0.8717444120403376 0.5890340268622524 0.8123982683586646 0.6446730418809848 0.5815874693360118  
0.9951279907528592 0.0507426086961229 0.7940011555948496 0.6917556360537932 0.6540189325039966 0.4822408537510591  
0.9946560283650578 0.8477638600936437 0.7916660048194863 0.5810494035149110 0.6623793339318098 0.5786127719468558  
0.1255514300732062 0.9422204835467032 0.2606053219128537 0.6172036502525026 0.6556059409472971 0.7675785592147359  
0.1907405546471075 0.9396099884702244 0.4259197512971776 0.7455792054167333 0.6563494192686141 0.7483280923994952  
0.2987447593644912 0.9438996769328568 0.5326441470692154 0.8028361776997252 0.5450413920891654 0.7063579915743101  
0.4036157207309408 0.9352737175374937 0.4206905192892207 0.5735708500178086 0.5504893418558138 0.6773891407608085  
0.3816655108219765 0.9427129796951297 0.2293972068363721 0.9187800503548611 0.3734396268377447 0.8998980938708920  
0.2549189067424071 0.9501593279893423 0.2600905124903187 0.9020527775987858 0.5033831481768809 0.9090362492616982  
0.1252009514170887 0.1593027861895250 0.2687351686201686 0.9080270379829931 0.6337683532089816 0.9326220453529817  
0.1860766512310295 0.1551613952159035 0.4355873381678060 0.6884750531945398 0.3716258777828388 0.8915532060757432  
0.2987965547415376 0.1552557328042067 0.5300714604988565 0.7053881553107254 0.4999293636133093 0.9061007936703748  
0.4027803684409723 0.1626097802202744 0.4164348551609287 0.6920567231138018 0.6288731688454398 0.9213940692514836  
0.3917609712575754 0.1568345016421702 0.2230583943138412 0.4979610558669788 0.4452228990781360 0.6993335620654534  
0.2557401724173055 0.1532820735834929 0.2722168753692166 0.4935484511577141 0.6486417992499227 0.7163599087883354  
0.1834647205789240 0.0501441949011298 0.3229652212102613 0.6246393363254016 0.9462561230578984 0.2430001649821902  
0.4171489353344505 0.0482344472357449 0.3275891790373160 0.6888148901577689 0.9398534901769899 0.0767206861575215  
0.0845273339422803 0.8708027971842880 0.1111879233526699 0.7979886945131263 0.9398865192003781 0.9744726610898752  
0.0919602414962983 0.0006912270418342 0.0929865796499679 0.9059918188278313 0.9395799459595701 0.0789729908549661  
0.1033498308695503 0.1302907465515573 0.0820729141953133 0.8818543596228919 0.9422213268394299 0.2683741509780234  
0.3029446731258565 0.8710040113406534 0.1239831612512071 0.7542096798554487 0.9455029560312512 0.2430522585928133  
0.3068960240646243 0.0002441166241690 0.0977607290107360 0.6266927446729980 0.1542580605534352 0.2407559832307744  
0.3002451397070686 0.1293588357725924 0.0728335876492009 0.6935260156310393 0.1603653914077442 0.0786406215946158  
0.5015595175717539 0.9513766242050918 0.2956964928110892 0.8016325942074646 0.1555923559241480 0.9728913859950887  
0.5056863737459668 0.1427063271281795 0.2972505018030354 0.9073725342291580 0.1612989183682050 0.0815068186717360  
0.6282238036060881 0.5577492615074191 0.2486320766231649 0.8837970384366806 0.1554667820758013 0.2721961809906837  
0.6909705935093838 0.5553735621841762 0.0805352923784005 0.7565197213871093 0.1512201772075706 0.2461116527400375  
0.8008382864503750 0.5697036925551368 0.9805534143587030 0.6907230380462182 0.0497178655813383 0.1795641568641030  
0.9087205326817407 0.5578248763008310 0.0841545050042966 0.9240516300304432 0.0497750058473695 0.1772040213260781  
0.8846273547185057 0.5545856632896835 0.2726999685446208 0.5820465449933250 0.8726877646046630 0.3904665684788243  
0.7580608124147482 0.5447874173353147 0.2436236617385762 0.5906085600302338 0.0015697437053237 0.4128690044972973  
0.6257842953844976 0.3362546257229811 0.2400765334639750 0.5995486987437736 0.1307268182565960 0.4288283231576103  
0.6958148444060814 0.3410486460226603 0.0800978301059417 0.8058886877449327 0.8714819760257266 0.3812168305376287  
0.8025221444895325 0.3448507046481883 0.9706272491275068 0.8085384127412953 0.0010967786929411 0.4003511723125647  
0.9065579778282699 0.3345109552907147 0.0833576549634869 0.8050676496540793 0.1295257493919668 0.4233872050310444  
0.8837711326732816 0.3388069894557899 0.2723789745711895 0.0024461748405786 0.9469639929642177 0.2065350958898700  
0.7552726661283468 0.3474634204531855 0.2509184689301251 0.0045624580101837 0.1497646153945348 0.2067044209665548  
0.6827371072601282 0.4471138683423171 0.1888673500692850 0.8720305599640306 0.0599587878869080 0.7420957447062102  
0.9213232822471139 0.4458969063950709 0.1787217149199126 0.8060333473694643 0.0517279559987724 0.5788902639438465  
0.5803977912637909 0.6358522015037517 0.3870087098581155 0.7014927705263762 0.0561201813337699 0.4662615640179162  
0.5876702625062399 0.5079573630272137 0.4214934594246683 0.6000873560797073 0.0582668142310024 0.5865699335335710  
0.5879643537462598 0.3665296755302541 0.4230289929395260 0.6146731422951315 0.0573523038064445 0.7784386219062479  
0.8049212406352452 0.6260092663592270 0.3774947687555871 0.7423219473279827 0.0617247733468597 0.7469728705334446  
0.8128431460581553 0.4960374403366129 0.4051271262750203 0.8727803751155224 0.8436173494362034 0.7340210864689122  
0.8104136075125244 0.3667179177363585 0.4253060997110283 0.8057597245741844 0.860257077569786 0.5723393973792762  
0.0045837870866461 0.5435751269159422 0.2122881880227566 0.6951895256021781 0.8504632158469497 0.4755518975773470  
0.0042164964749952 0.3478476169034058 0.2075044406609434 0.5866440769757447 0.8443907840390840 0.5796035151039463  
0.8652934954052161 0.4362477374742542 0.7528627234670983 0.6157263738740847 0.8416518828204090 0.7690553281217826  
0.8096868277964669 0.4426905357597717 0.5813778435706135 0.7434038492641499 0.8396726145033315 0.7397503301760017  
0.7055227793601154 0.4369078211071952 0.4684937053063338 0.8041887817640084 0.9521536233769268 0.7078950288446839  
0.6126293590577510 0.4367599711493538 0.6041285491570848 0.5739068673036747 0.9509408180930899 0.6871986369446278  
0.6119718887930540 0.4511970963116324 0.7928308754924555 0.9159714086861812 0.1276209688049224 0.8939743141539538  
0.7339308152568336 0.4383290308988133 0.7373513889042599 0.9036610380323140 0.9984366065593797 0.9068352641744659  
0.8742478694898659 0.6488348371025441 0.7477933870593619 0.8993228507431689 0.8681681624663223 0.9210715717271631

0.6880019691275963 0.1297179579425730 0.8906435471476614  
0.6943623216454728 0.0001849709106281 0.9044001401231020  
0.6958573421079881 0.8701260580771889 0.9157007753453242  
0.4968539306743632 0.0550810413136630 0.7036736142047345  
0.4936539286594323 0.8505762093700600 0.7130248705077610  
0.3735728779672947 0.4393823602937017 0.7518250791654810  
0.3089524089338853 0.4510554664148093 0.9166877878155495  
0.1989692475852604 0.4409581858814818 0.0173198976337183  
0.0877290799617947 0.4398123784225076 0.9204543898610922  
0.1145410446098611 0.4441192404276812 0.7302606017685879  
0.2433387320989691 0.4391596304613924 0.7520143114193977  
0.3715513452801127 0.6606392860308938 0.7642419475857001  
0.3084185426062619 0.6365251685879335 0.9282593443163271  
0.1930696570349029 0.6516127742866169 0.0451275521487526  
0.0926583587478358 0.6591012809233699 0.9237861210792743  
0.1169928862515424 0.6560123603537215 0.7321703937443861  
0.2432652164401287 0.6595297260520198 0.7646683522288152  
0.3084392823870563 0.5486658142405795 0.7843097426359802  
0.0729584493098064 0.5504855735735862 0.8230339856548754  
0.4180451348344724 0.3715201644329252 0.5993783517930478  
0.4088004615371519 0.5012220906935413 0.5878464841116688  
0.4017736351902595 0.6311230645337594 0.5796467608665578  
0.1857988611322363 0.3725150576329271 0.610797984404020  
0.1917136431317726 0.5022858998576626 0.6003428524536399  
0.1988818480345900 0.6319491581702547 0.5858753917766327  
0.9920162240126205 0.4511870839013006 0.79236656130469096  
0.9973836123738683 0.6546496996291813 0.7946477828295396  
0.1276871042304257 0.5603257972630766 0.2586200468003304  
0.1904193927486862 0.5605089580579342 0.4271042342697980  
0.2991365008889550 0.5576808102834733 0.5312205550844425  
0.4030339374337773 0.5625226632794896 0.4176781955849035  
0.3838253391105729 0.5431600945931783 0.2294993085030805  
0.2563498672643607 0.5488308761844395 0.2633821236525470  
0.1257307892215355 0.3407910049481019 0.2640773749280183  
0.1949639337909065 0.3403068383780488 0.4233124258424374  
0.3006744871183006 0.3453453377527050 0.5319714227921797  
0.4028064831283346 0.3343830822428743 0.4136785881121592  
0.3810797180218516 0.3585237573275622 0.2254279178971449  
0.2542960810797743 0.3565258954917269 0.2517849844370971  
0.1812272062506323 0.4506103213572266 0.3239103576670430  
0.4349493921390511 0.4484539421715936 0.3387745957211818  
0.0749153231538058 0.6269304196039909 0.1108627012830789  
0.0961746265090453 0.4982149190187486 0.0935325012923742  
0.0996022272477878 0.3680488455119024 0.0782950854758939  
0.3151578604633336 0.6301731590322587 0.1362973125322182  
0.2989606792807258 0.5066705595398371 0.0897032868729995  
0.3044635380228328 0.3767803231000485 0.0751997100087791  
0.5031153315465976 0.5555076735793441 0.2926689243713548  
0.5004313421785590 0.3410246432763677 0.2849879823666333  
0.4250666692992618 0.7493488257266521 0.6465770449519906  
0.1881361594120598 0.7512090940430763 0.6542591491132099  
0.2930746734202758 0.7523285200379524 0.0515338007394927  
0.1046577055867810 0.7482735350085282 0.0615982803417559  
0.0786577017782350 0.2489575140552442 0.1465687409991797

0.3125086457713557 0.2585991382381034 0.1548243150625102  
0.2126653515548217 0.2507512276722356 0.5612937985375213  
0.3874218179158261 0.2495204972127057 0.5571331999799476  
0.5740882646666827 0.2461793612226274 0.3545739393718016  
0.8079409330706574 0.2480557409561555 0.3492132164735238  
0.7141595461081405 0.2506014219221686 0.9435008184880433  
0.8896322389584719 0.2496247559576610 0.9414429866977335  
0.9176629994342006 0.7502111169264080 0.8514571213227986  
0.6869297964203598 0.7491528697456517 0.8515647885897609  
0.7846909474228806 0.7553685733743641 0.4611198410463038  
0.6090670670153089 0.7531800627739352 0.4473533616458086  
0.8732169722833751 0.7309845687661866 0.2931490989127521  
0.7747074309402845 0.6714020734799669 0.4760714625889888  
0.6222933297551145 0.4376851816703063 0.4655528189081236  
0.2733283852497334 0.6718583111803483 0.0288764305625493  
0.3049223880491195 0.1760526684119227 0.1767629089303236  
0.4233249609392308 0.1731886946692094 0.1756573439367946  
0.3453421036352296 0.6595903028621266 0.1690345877549311  
0.6564891668998023 0.4252095999434522 0.6271568183491311  
0.7506304548812526 0.7097152740782586 0.2485574106751237  
0.7570584415193239 0.7302881488459714 0.1227641336518968  
0.7674063532615737 0.7920006861867729 0.2135184515537945  
0.8582592299437851 0.6748817194163081 0.1719247577105969  
0.8768235689085557 0.7577675929421157 0.1471982332027167  
0.9340974138527207 0.7553409164271591 0.4579186993673413  
0.0135918309484304 0.7364666439561293 0.4149179008542495  
0.9541382106998220 0.6732675147446336 0.4255929897566132  
0.9534402289754911 0.7893367575808122 0.2810841226870767  
0.9666334848810944 0.7063961298952292 0.2489522784437716  
0.7766181348087550 0.7404320598873114 0.1956233158143081  
0.8485433354968593 0.7257213025292624 0.1965465814107102  
0.9618672214040271 0.7249155607493941 0.4065750864752660  
0.9416448965285042 0.7381534411530226 0.3026045379406346

## TS between DEE and ETY on LAS (T2)

0.4230205096271986 0.0589846605135550 0.6630875311872266  
0.3092789233733412 0.0273617847765726 0.8084976504378567  
0.2792933745457017 0.0595702021199111 0.0302411169675883  
0.1226204029175730 0.0608708737897909 0.0310032798714966  
0.0688941362782869 0.0281637432811906 0.8200738951641301  
0.1854468863170532 0.0598036235177940 0.6777248474657428  
0.4222002371341674 0.8260155656966947 0.6784711821678899  
0.3086655817764220 0.8699708471185114 0.8174952480673870  
0.2748482316808344 0.8278037581034796 0.0339364047971381  
0.1192064139071953 0.8237548609658581 0.0309916781353038  
0.0679166322080974 0.8698714060593594 0.8209332775239496  
0.1865905929297710 0.8277509586318339 0.6874686194072588  
0.0770913662437383 0.9403443360247613 0.1680248841240668  
0.1885563675773970 0.9712555415717534 0.3176582041146270  
0.2198027694481622 0.9395751107473513 0.5367043529784065  
0.3768844476123599 0.9362843925810247 0.5329739968391093  
0.4258255923451994 0.9684980119963448 0.3188741850976220  
0.3103465597420323 0.9415921492016572 0.1772331743741561

0.0782433225905094 0.1717413323449863 0.1767771288836911 0.1207108199883930 0.4368608252867295 0.0276576504532955  
0.1892083751555506 0.1297120363535134 0.3233801328879463 0.0670456098734014 0.4717107640741942 0.8164871254399187  
0.2213140291968581 0.1733167487343615 0.5375430709196984 0.1840360272305051 0.4401785185629469 0.6739491050193291  
0.3751811845865139 0.1733739947591257 0.5281362603518269 0.4225305625717986 0.6724892669544099 0.6771217331278567  
0.4307529562028893 0.1254611500202981 0.3227801901371471 0.3074896497148153 0.6265339507020713 0.8134037661902114  
0.5760914325991585 0.5626823918630214 0.3396505591167018 0.1180484235195952 0.6712042447040961 0.0347995727210813  
0.6898473163775736 0.5264169144012538 0.1919370928299349 0.0703050621510162 0.6300725721004481 0.8194594826615967  
0.7221203318728423 0.5639092409792276 0.9730928477844314 0.1870520008314121 0.6744111842549078 0.6855704049437794  
0.8793180205317612 0.5652668915373333 0.9759782043534680 0.0767494200892303 0.5572298687437485 0.1679061271864121  
0.9300807216844268 0.5245535658440516 0.1867597200340579 0.1880569580173309 0.5296944689858816 0.3187811952891869  
0.8139757830678741 0.5547328736587056 0.3264078035643366 0.2204794959973956 0.5630423770488937 0.5371807767782070  
0.5727540895974909 0.3242415786138366 0.3276024850217089 0.3777728713724952 0.5632430110632333 0.5301614690909315  
0.6899514562503224 0.3681722439824891 0.1908352142225115 0.4322588779927297 0.5266041819426358 0.3212707930961057  
0.7254080202150163 0.3269064473222848 0.9725187673479667 0.3129164588702372 0.5520267249113561 0.1827630460835113  
0.8793487932427734 0.3254613394431217 0.9731170835400580 0.0771702125641114 0.3262223992459894 0.1739296034183249  
0.9296754536159729 0.3670178963645707 0.1846077201485077 0.1894975727633481 0.3719277639474895 0.3155372804048043  
0.8137118513749171 0.3256312312816547 0.3225918310438093 0.2234568133861791 0.3270955743166572 0.5318368296535155  
0.9193146699752236 0.4420263012792050 0.8382767903050815 0.3770389474562180 0.3253708081941654 0.5248983833407456  
0.8039572149445326 0.4671873905145891 0.6920791548475892 0.4298643055799744 0.3702586093375027 0.3158059751611336  
0.7827867651650930 0.4351260057589136 0.4693116740374804 0.3122488215078068 0.3353466450017160 0.1771284902411208  
0.5706991710673811 0.4733962374481671 0.6984745726249892 0.3727583695119266 0.0585506249362608 0.7542645701905010  
0.6864620437017201 0.4410237960924060 0.8336396234610108 0.3100475029260991 0.0496223367852504 0.9212314684174303  
0.9242506070532904 0.6719728340607748 0.8310455033735900 0.2003243738955077 0.0520968471907642 0.0233839920474546  
0.8083674241726077 0.6256700231355460 0.6924785459686608 0.0908667132194338 0.0608443506459386 0.9227752551054382  
0.6160257634018718 0.6757838619257370 0.4746440574430257 0.1157089010487911 0.0533974561174714 0.7324278881733063  
0.5667258694632125 0.6305642008528033 0.6853391748817732 0.2434878568873453 0.0538376895508308 0.7569678616918575  
0.6855155901838852 0.6720837326622896 0.8220152280555938 0.3722568702747276 0.8352916903747981 0.7693924653122792  
0.5752127234490526 0.9430553725537839 0.3361480529729255 0.3078109331385793 0.8551657742752322 0.9332473242029354  
0.6894979129925259 0.9705160456916947 0.1864860619044125 0.1963736052198823 0.8392185075040877 0.0255590509641824  
0.7189844209142676 0.9376863886627678 0.9676867402888625 0.0873344897052115 0.8372871042092628 0.9246285006153260  
0.8761410740064894 0.9367061302617761 0.9702280730550034 0.1160689154250931 0.8443933030676037 0.7349681508789794  
0.9288175303821576 0.9704682172107982 0.1823648159027776 0.2428950225998821 0.8414242181926499 0.7677435544197468  
0.8119954919747179 0.9413457945194079 0.3239659280539767 0.3126146058570043 0.9481524896928348 0.7971826777472838  
0.5774212508652444 0.1693695300576920 0.3309660763138172 0.0724875134782842 0.9489216887945960 0.8294128465747832  
0.6917040932103606 0.1288053306755225 0.1860957513327572 0.4153205711410150 0.1271066419225814 0.6023122134468011  
0.7246528267196460 0.1740506449724983 0.9715367129911063 0.4099821248617508 0.9976641136627740 0.5898135911900209  
0.8787688058071448 0.1734933323115919 0.9723612051259956 0.3978793809075669 0.8678156296828036 0.5841863850943423  
0.9305230716522843 0.1288672569031513 0.1831132341040736 0.1889846921761764 0.1313500828827641 0.6258994785423617  
0.8134959103403209 0.1709558838769527 0.3204431168564249 0.1917938372267095 0.0024782555354368 0.5958268532789994  
0.9211425864761179 0.0581920175960445 0.8344458015418463 0.1977333419175891 0.8720195790389434 0.5902770319391309  
0.8061931095734869 0.0296490513617553 0.6913562318494921 0.9949856630770112 0.0505648930527919 0.7946171409895034  
0.7799752549998099 0.0606567733320467 0.4675240887529066 0.9943386198354840 0.8481203000187613 0.7924503349881092  
0.6230020007384071 0.0614297648098511 0.4742196699426841 0.1251190108284610 0.9419952730364322 0.2617159246737706  
0.5710486775881642 0.0302265314842102 0.6891480607209224 0.1907207211621866 0.9397742276324620 0.4268380280368619  
0.6856561097065142 0.0608640580341639 0.8298901327425516 0.2986986144847762 0.9440466321578463 0.5334020635818891  
0.9211062231154912 0.8272674663368189 0.8241722875410672 0.4035621771250966 0.9355687789402075 0.4213206240175171  
0.8064946631107988 0.8712849356193018 0.6860185457615152 0.3813651743237630 0.9424676356836674 0.2301856957735914  
0.7729147492237242 0.8301815178949182 0.4693097100091752 0.2544946687598702 0.9500610997576403 0.2604597974085498  
0.6188096118532584 0.8295046710254468 0.4736114152757991 0.1252696843750501 0.1597115680735955 0.2692651247820009  
0.5679040564283793 0.8719758696617791 0.6871322460409530 0.1860208068908776 0.1552116946613588 0.4361103648803026  
0.6855320053059599 0.8254895222746769 0.8185232021261387 0.2986589392749978 0.1552121963459754 0.5306748131357159  
0.4231401878847312 0.4397257544751431 0.6594707283633232 0.4024424086751208 0.1624260048551301 0.4168512279603576  
0.3081688351054078 0.4702512328830785 0.8018860680512753 0.3915628433559547 0.1570559823544503 0.2234244479066860  
0.2774543194120221 0.4427493806133517 0.0245003017716721 0.2556739936671141 0.1527544021138984 0.2725360318323460

0.1830734005987434 0.0500491122524849 0.3233779620432218 0.6244598529515849 0.9463375705598571 0.2433465409760998  
0.4170286991804815 0.0482469522528683 0.3272645431484245 0.6886720815082271 0.9392086971524394 0.0774171700708917  
0.0847868002689943 0.8704754871240139 0.1121020984702584 0.7975832607136011 0.9405852481402789 0.9743902778838448  
0.0922941144986610 0.0003484768735372 0.0937121033384368 0.9051866198588999 0.9384693814910808 0.0797540307703238  
0.1034728121904148 0.1299900527077201 0.0827361458720061 0.8819629225661978 0.9432033683392940 0.2689536571330693  
0.3027012470873254 0.8709909004718184 0.1243258452319947 0.7540856040384334 0.9462171610437559 0.2436229539558425  
0.3069183137962564 0.0002406099305294 0.0984630986735123 0.6265167392689263 0.1543036787055800 0.2410940982941563  
0.3001403037712130 0.1291991781936778 0.0734171023826708 0.6918032758220662 0.1598407890307058 0.0773891349125184  
0.5013852472931511 0.9512422989610657 0.2961852544378726 0.8015343512815079 0.1561182675786028 0.9756623909162891  
0.5054248664245148 0.1429424831492643 0.2975839315287136 0.9088094422756718 0.1613237943388178 0.0799783245299885  
0.6284426807667792 0.5580140294197217 0.2496253420719396 0.8834892183632682 0.1549996446226614 0.2705125986367755  
0.6903693500525176 0.5553978098172530 0.0808423868677773 0.7563124682270085 0.1514488243407970 0.2440213097514828  
0.8005823452715021 0.5699270178833955 0.9810425674122225 0.6901455024143641 0.0497160075539044 0.1791982192118002  
0.9086210093794111 0.5583229200230259 0.0846292575182004 0.9245444973156598 0.0496671852277378 0.1753842891000057  
0.8848897554951327 0.5533118374703067 0.2733080812262427 0.5822356460426359 0.8730514878180783 0.3909263117903152  
0.7583449631938821 0.5448735698120560 0.2429130979681644 0.5903789803070476 0.0020396282823461 0.4127317345705778  
0.6257449464441166 0.3362170890930346 0.2402132117361477 0.5989717435245269 0.1310784917587644 0.4293965874969796  
0.6948803119087937 0.3413931248828324 0.0793726311655599 0.8061830954027160 0.8723464357050048 0.3811921948550269  
0.8024926293457264 0.3446784635759820 0.9719698437213228 0.8084818111767267 0.0016533714833004 0.4008872310816967  
0.9076502388608310 0.3341809548223548 0.0822298856373586 0.8045566413538793 0.1299581003394061 0.4216587467296940  
0.8836933608744976 0.3392731696643305 0.2713386589569932 0.0022722320757335 0.9466317831555818 0.2064534212260812  
0.7553198875252455 0.3474113199244790 0.2494072545830096 0.0046773638849475 0.1497746819005336 0.2070852431049232  
0.6824371822656006 0.4472185476407575 0.1890750447039662 0.8719206462156373 0.0573159822113733 0.7420036915162959  
0.9221331154553537 0.4458908052565451 0.1768367592095949 0.8060652631662373 0.0538287334872234 0.5785279620638866  
0.5795559203560193 0.6357512359566170 0.3876699643665525 0.7012162012612176 0.0566584043653545 0.4664105873473130  
0.5873936984835234 0.5077482661647692 0.4217867918408093 0.5998731275723234 0.0581371016658670 0.5867430271372358  
0.5877933760843619 0.3664830729769558 0.4233716782270354 0.6148120917996734 0.0579304567807877 0.7784426585745341  
0.8051365880505754 0.6239585920263219 0.3796529259007475 0.7424261594711087 0.0585292956844214 0.7470366837715915  
0.8124925108183053 0.4947894223197026 0.4043414672333651 0.8728369212873984 0.8429594556038758 0.7336880285528227  
0.8097394929948566 0.3660008744753667 0.4245634759474538 0.8062208059382014 0.8532685716324526 0.5714871061173471  
0.0047003660792339 0.5436853579281538 0.2123666455359439 0.6955182329511070 0.8484196823517867 0.4743007920129401  
0.0043589460125024 0.3476438182206537 0.2076008920407072 0.5876984312054884 0.8452423404668865 0.5799154833857271  
0.8651353521254239 0.4378714210147859 0.7524370097557475 0.6156106789467150 0.8414619373483688 0.7695601457602645  
0.8098779789334721 0.4417616718233296 0.5808330670319685 0.7433210203462739 0.8394371770339831 0.7398415060335717  
0.7052266083635662 0.4363962465835690 0.4692575111217770 0.8043515972524199 0.9503424271186116 0.6993301818334126  
0.6125268862191662 0.4371575644477214 0.6045837655507449 0.5739677836647070 0.9510306267704234 0.6885532096998075  
0.6121474719815352 0.4511742276867939 0.7931074178465503 0.9144505208973329 0.1274525527811169 0.8921784517724325  
0.7340441649085304 0.4394039784588071 0.7369189750757464 0.9042058383811751 0.9982269031738203 0.9084867046928387  
0.8741685336703447 0.6485691740677318 0.7478815482592790 0.8981859875642720 0.8677932260166304 0.9208942774817473  
0.8116636250207292 0.6492692022665959 0.5819761193679982 0.6897070145744975 0.1297496754882376 0.8888693799153721  
0.6906413695337750 0.6546762745212412 0.4838561079238708 0.6930602680521886 0.0001467984555479 0.9058229352907234  
0.5797522676855072 0.6623328292558944 0.5792937552709181 0.6958604082571102 0.8700538565928401 0.9157560171077814  
0.6169603942688812 0.6559885131592657 0.7679702430399039 0.4968343975794547 0.0551423103542777 0.7041937631493027  
0.7455804317470008 0.6560762842825184 0.7497500557319202 0.4938291235163536 0.8505371632244019 0.7125674789640755  
0.8025948416670485 0.5460132135668389 0.7011794232783424 0.3735214922383003 0.4394276928547328 0.7517806085119643  
0.5731183072644799 0.5507055702803695 0.6789097683170023 0.3091881024976482 0.4511212849549444 0.9168800283553044  
0.9180173992750326 0.3734036516392968 0.8985180447616810 0.1990736467480773 0.4408849159131170 0.0170992270524784  
0.9017246150972323 0.5030619605587211 0.9102506627531666 0.0877993977990839 0.43984644474557205 0.9205930505558088  
0.9079003697866541 0.6336035778487613 0.9326933429422578 0.1144760249454550 0.4441962901612828 0.7304633296036287  
0.6891157428338640 0.3716259957252615 0.8906379166145134 0.2432944756731660 0.4393545793095190 0.7524530007204625  
0.7054007385197201 0.5001554258452864 0.9061871310112098 0.3707266931014474 0.6611234615701411 0.7641631097589476  
0.6915894013373546 0.6289861075282557 0.9221468633215125 0.3084919928979130 0.6364787295485256 0.9288994369668890  
0.4979572564382356 0.4449910984162685 0.6995847125426048 0.1929385870571634 0.6510660172813342 0.0454172019193977  
0.4930279388607636 0.6486137232647842 0.7178504357778454 0.0927424159579308 0.6595918648378211 0.9235984287563782

0.1165360048952706 0.6562466814522780 0.7316480585933957  
0.2425075872521940 0.6591458225730653 0.7660670763346193  
0.3084966755208738 0.5487651201808754 0.7845416693233265  
0.0733012324492326 0.5506977812084041 0.8234309821390580  
0.4180633099357207 0.3714947221847716 0.5993401241911971  
0.4090257919427453 0.5011852399955808 0.5877346109338564  
0.4019164242703341 0.6310310957695376 0.5801383467415023  
0.1859102664350365 0.3727302330164933 0.6110797042876850  
0.1916850122560126 0.5023915605264312 0.6005503672124795  
0.1993222924359711 0.6320916922086596 0.5864455303013849  
0.9919044227060082 0.4516316872400477 0.7927183462020539  
0.9971884113010087 0.6543574307045897 0.7947225745936580  
0.1278462594177817 0.5607082202026862 0.2584584497960367  
0.1904072760819298 0.5609542066307881 0.4274735840038797  
0.2992326083008651 0.5575711835375432 0.5314060057434382  
0.4031368103072067 0.5626371839038050 0.4177709051160016  
0.3838650606552352 0.5431353816617147 0.2295593463281837  
0.2564077480862540 0.5486685788731063 0.2637449742426268  
0.1258393086072035 0.3409167516179535 0.2641540209622772  
0.1949179711773963 0.3403449025220035 0.4235190013496800  
0.3007157103334683 0.3453635533184607 0.5320001313340680  
0.4029024249038359 0.3339439965863776 0.4137336722350239  
0.3811074719875859 0.3579033025315665 0.2256123973482474  
0.2542623983335714 0.3573681511880756 0.2521630501458195  
0.1808431759704293 0.4509673232056974 0.3246640437131491  
0.4343715377773983 0.4483409416653499 0.3389553925271237  
0.0747093359653991 0.6268565583498459 0.1104737905859200  
0.0963898278416123 0.4981885927476660 0.0938691475374386  
0.0997493544405491 0.3680000706122316 0.0782031746857520  
0.3149435195006773 0.6301323514390990 0.1366925997508157  
0.2988415122540924 0.5067740985951508 0.0898233956811482  
0.3045331722502375 0.3769012947498738 0.0754222744567837  
0.5031834454269105 0.5550379765336825 0.2925487255632099  
0.5004356519421577 0.3412024254022769 0.2849717017727290  
0.4249640969929581 0.7493228696476228 0.6468743095495664  
0.1885074743324390 0.7512342568780613 0.6549796376739784  
0.2924623269038429 0.7521147980587140 0.0522760562196243  
0.1050593564380747 0.7481102552900473 0.0621419696285579  
0.0789087810685301 0.2489308141625018 0.1465899752759806  
0.3113876030439263 0.2587139309469250 0.1552387381193647  
0.2125829941486360 0.2509362015211086 0.5615845070837476  
0.3872865692083468 0.2494516128039027 0.5574012884557018  
0.5738513891336242 0.2463493657139671 0.3546587131879265  
0.8080147772671754 0.2480488957985640 0.3470908675608376  
0.7140229179902562 0.2506557333923805 0.9434182987823304  
0.8893706941603647 0.2495684875830498 0.9401899731548560  
0.9176494422543890 0.7500103926808979 0.8517289217532806  
0.6868318547820557 0.7491284016489251 0.8523057609182425  
0.7856064879648944 0.7541671379946795 0.4498340071489422  
0.6069866628535225 0.7531282086711933 0.4476032756169958  
0.8681155581816247 0.7289952496970447 0.2730250561903185  
0.7735300719309385 0.6713668999664123 0.4742626357259705  
0.6220422695119465 0.4375743830995810 0.4660243765483247  
0.2731057526049867 0.6715902323198425 0.0294221665940743

0.3046959536300112 0.1760337219332160 0.1771678120502851  
0.4231443330480929 0.1733512063824753 0.1760231472379814  
0.3442453600123770 0.6599300252457457 0.1704740918539292  
0.6566499760091032 0.4261908876091390 0.6271526789790255  
0.7286750029626333 0.7096775417841196 0.2359492505779870  
0.7357076349895791 0.7414366816252160 0.1172522082358813  
0.7464143896630387 0.7939937574746123 0.2178162450379686  
0.8354070624090262 0.6817060789692367 0.1469263973356234  
0.8535616980959613 0.7661880104512546 0.1342483516778296  
0.8924373297301530 0.7412233980027056 0.4117823415060607  
0.9755241888056072 0.7617281672026712 0.4414916596729105  
0.9520966461632475 0.6768125242821131 0.4216658807089501  
0.9540240198621291 0.7892128245512919 0.2731860016316023  
0.9670007396904854 0.7053807719129098 0.2402681545542749  
0.7569633234647140 0.7443523615063712 0.1914717937352733  
0.8307855594534237 0.7302139897254597 0.1831851389545139  
0.9437548480809566 0.7293390559685652 0.3963527507652612  
0.9398259719053368 0.7381728289840540 0.2876586644384396

## ETY on LAS (T2)

0.4239965151413455 0.0588458266059174 0.6608724261311750  
0.3094554243543107 0.0270566438103050 0.8055469809304057  
0.2796008387884645 0.0595863919209261 0.0268063931229887  
0.1230157658143948 0.0615560091069585 0.0290802619850350  
0.0694515691323982 0.0280443782310645 0.8185410106235059  
0.1856337234734692 0.0599631455072953 0.6756601996799799  
0.4229369593792184 0.8267231302516260 0.6762332897984661  
0.3090092034708959 0.8696774222859566 0.8153217395408383  
0.2760464097716004 0.8286320499648919 0.0325721836996763  
0.1204047307114143 0.8243464093168251 0.0297250608958311  
0.0693396973872565 0.8699393581323023 0.8193170440302355  
0.1874712849644651 0.8272087635980272 0.6854032766371729  
0.0781079545729664 0.9407634256331615 0.1666014058663949  
0.1895711297213252 0.9708027665048744 0.3162080787258175  
0.2207698119215703 0.9396388285459915 0.5352059583250898  
0.3776860061258707 0.9368515998694293 0.5302433424762553  
0.4269659733839655 0.9695663081098389 0.3169687998779585  
0.3112235611304922 0.9422362533310014 0.1754039008240416  
0.0785410702619617 0.1721571668122511 0.1750970888046671  
0.1895973834249804 0.1292728864614964 0.3207228467947709  
0.2217432006553634 0.1733876166996275 0.5353596630088040  
0.3755665057628929 0.1738277161425024 0.5277950397031969  
0.4312848976404677 0.1266249923370700 0.3223336429504156  
0.5747195558371879 0.5627515207723670 0.3372714078967556  
0.6901092144320925 0.5279686459866693 0.1916048134921197  
0.7212628187555803 0.5647963216083902 0.9721464039998705  
0.8785485021703533 0.5655805621063852 0.9727532382906948  
0.9303203813875202 0.5240984625995756 0.1809988772326953  
0.8153463129247008 0.5558130088356280 0.3252443094338544  
0.5725729583362962 0.3250967149078830 0.3254589531773937  
0.6904206541801539 0.3693761770053277 0.1902884546866302  
0.7258570886576209 0.3272514262055553 0.9717152616780359  
0.8794373377482815 0.3246526836032155 0.9705089137035164

0.9296014773513638 0.3670594744073292 0.1802256250155912 0.1897173702844386 0.3715105004169295 0.3140159780101908  
0.8143813671056277 0.3276698209042523 0.3226241152313730 0.2234706399196126 0.3272150426743003 0.5306604281197598  
0.9195733181812182 0.4417099202571051 0.8373355454412936 0.3769326362140192 0.3254904223071983 0.5237961134356705  
0.8035721264055722 0.4678460243442756 0.6930900352247127 0.4291114954765478 0.3693547988311856 0.3143584782315041  
0.7822951423194729 0.4369656499022827 0.4691947477450609 0.3119588280233889 0.3342663864216568 0.1746945883973526  
0.5707850037486909 0.4734207406846796 0.6968264714070221 0.3735102544828852 0.0571101847378315 0.7517256710616492  
0.6853318708878480 0.4414047036498828 0.8340115900460846 0.3108637430721673 0.0488770174286747 0.9184928052494629  
0.9245068918298607 0.6724012501196021 0.8257940120155790 0.2007753222150562 0.0538708505469121 0.0189616897073796  
0.8077450975668611 0.6263293413070948 0.6914364707095570 0.0902765606025312 0.0609952857102921 0.9215657876440396  
0.6173203472866593 0.6749789621062637 0.4672901149721630 0.1162756343584880 0.0537648602567995 0.7312096525782771  
0.5698007037859740 0.6307287258763595 0.6815706504123055 0.2441943948412165 0.0550281378427264 0.7543368658222256  
0.6859852114068159 0.6737545278372394 0.8222349346631765 0.3735139204043741 0.8363326850618659 0.7677974342966598  
0.5761890158135704 0.9438513706806861 0.3352931580565041 0.3084766368529485 0.8556886079035264 0.9313077532601760  
0.6917085737078192 0.9714847664239739 0.1872504970375235 0.1976307420310110 0.8402249441646810 0.0258073080110443  
0.7200970969495568 0.9387550039979343 0.9674871611298526 0.0894028323528244 0.8371727703298772 0.9225857910466543  
0.8772631384642072 0.9364482723558358 0.9694973517784746 0.1171469801398552 0.8444638210262679 0.7328141112411979  
0.9298626470788282 0.9712336228089815 0.1817603521536521 0.2439589194892702 0.8389975969128558 0.7662030112444836  
0.8137582111736006 0.9414953398802938 0.3242299339810726 0.3109610965162108 0.9478268093422525 0.793820866110586  
0.5782173931552970 0.1702256862788541 0.3283521786808254 0.0743836687336612 0.9489417924440701 0.8280458968700675  
0.6926287333223405 0.1299845752740599 0.1848477453814832 0.4159736273123012 0.1275607737231177 0.6015546492714618  
0.7246684759370555 0.1739424205633545 0.9688993098543173 0.4115068607689520 0.9982639820759308 0.5860620744656678  
0.8786756386343083 0.1731079069193735 0.9697625945406749 0.3984115029434249 0.8685658038944370 0.5821257298290550  
0.9304327485035462 0.1297945580908523 0.1811213621646605 0.1885023452827872 0.1312000801201098 0.6225691209417692  
0.8140013364407357 0.1730488077495578 0.3191645163827132 0.1918895525189021 0.0020861137119864 0.5945931050267895  
0.9219014241110381 0.0578611457587066 0.8330517476583118 0.1997117242147111 0.8719217916526708 0.5890124336946425  
0.8066342603174024 0.0310888870904186 0.6900208815967114 0.9955056606530257 0.0496398761393675 0.7922714071059156  
0.7807981415075516 0.0615849352650553 0.4660568776758094 0.9956577151550787 0.8485187865936836 0.7914343567204745  
0.6238992690896834 0.0623653136246200 0.4725972348454794 0.1262558169372520 0.9416827710565913 0.2603375336429182  
0.5718835785928127 0.0301967008686498 0.6860514118352630 0.1918045797987121 0.9393607236444592 0.4253402116800738  
0.6860685279543548 0.0612544957517366 0.8283945431590800 0.2995790911879431 0.9453348046469358 0.5317679888879148  
0.9223395238859818 0.8279143859976994 0.8233325132405449 0.4038961132121026 0.9355512765421897 0.4183194306766695  
0.8070250507081496 0.8725952249313134 0.6864548424364739 0.3824988439045134 0.9449827174544021 0.2272713166519466  
0.7734001040723300 0.8309324780269722 0.4690519917505545 0.2556600457648368 0.9499222111015080 0.2590420416601588  
0.6198986510546971 0.8294203468781921 0.4708342302450808 0.1248777074655489 0.1583409559992526 0.2680758346168845  
0.5688375782667554 0.8719665632663967 0.6837310820592388 0.1875686297015377 0.1558981308971904 0.4327650059918184  
0.6856782263546753 0.8272311138653022 0.8187985717727299 0.2991297697788633 0.1552028374222046 0.5302982832301626  
0.4229635217335592 0.4405569072023006 0.6567719307729730 0.4025917162657223 0.1634922598155008 0.4162022137211230  
0.3081282004182873 0.4699521267361415 0.8001613035473967 0.3917697270223323 0.1571321310901708 0.2223133762568723  
0.2770652229183675 0.4422218676500083 0.0217215671390236 0.2556802463905948 0.1522625392697788 0.2680340312204019  
0.1206190152499356 0.4368265235312994 0.0248840937769088 0.1843459125735277 0.0496955148192357 0.3224030048854787  
0.0666731638207751 0.4717028733635910 0.8144838486000949 0.4186995353432529 0.0492407801561820 0.3277942855463998  
0.1839466452723930 0.4401334632852257 0.6723214645565652 0.0854004800421009 0.8712248459798351 0.1098295254747732  
0.4242026505166797 0.6728544953222860 0.6721107127159078 0.0944786934296182 0.0009065985938707 0.0929071157225385  
0.3094938306431330 0.6266185510930836 0.8099017268275044 0.1036519403962374 0.1306162304461369 0.0808024996399176  
0.1190767699087684 0.6716571246600019 0.0329487906439339 0.3048473859188979 0.8713564375000160 0.1228784599168328  
0.0706364278939090 0.6300015026201317 0.8184361616207255 0.3059416500863295 0.0002394444839271 0.0957585900828080  
0.1879514837886644 0.6743126632054259 0.6834331453565934 0.3020571606490042 0.1289318350738757 0.0698561555465970  
0.0772880717055669 0.5572255099385760 0.1654460495165083 0.5024873350162667 0.9522321411293713 0.2943344180397306  
0.1889135253280123 0.5297799483399196 0.3161275798710605 0.5054246704974910 0.1453432265664107 0.2964210137053024  
0.2205368528471147 0.5628765885824072 0.5350414647462117 0.6276732048669063 0.5579897436593011 0.2483353837995721  
0.3778971350012189 0.5639497623629350 0.5268839503533643 0.6910573974161153 0.5572043091388388 0.0809190359631378  
0.4314364285416031 0.5254616950679805 0.3181638658426799 0.7998507770358140 0.5683801407340248 0.9764074921652104  
0.3127100338610664 0.5521702342667563 0.1790495670963281 0.9075526686757447 0.5606711027076918 0.0818429894718019  
0.0770941542666530 0.3266936174067009 0.1728436628666198 0.8850626931604785 0.5475810420973998 0.2706976594745984

0.7573801381070118 0.5476552148054114 0.2452615961215831 0.5907616436348745 0.0022930276742168 0.4131863573619780  
0.6247359237707507 0.3390341919201097 0.2376014200635181 0.6001137139655716 0.1316445704732576 0.4262341122942552  
0.6964907623095269 0.3420385296352657 0.0792496307259957 0.8086155775133882 0.8725957032577250 0.3821373173060421  
0.8028964582444182 0.3451092296345984 0.9686104261013091 0.8096316242434891 0.0020275035917355 0.4010484941307988  
0.9066875360813231 0.3310241114280120 0.0806687761927244 0.8046592486464018 0.1308942321412143 0.4192441870628016  
0.8830458059285440 0.3438579950462925 0.2690958646818296 0.0035659773359854 0.9479249927223320 0.2049140948888683  
0.7542965398034944 0.3476369400488837 0.2514589782300982 0.0044264051873693 0.1519194478454778 0.2041055573109767  
0.6848919217780559 0.4485941790830641 0.1878221972451244 0.8724307980931086 0.0582683959894129 0.7408587253161317  
0.9245015520222604 0.4455737462586491 0.1646636672409920 0.8065755626384685 0.0557511528083291 0.5774162964860891  
0.5755858439728081 0.6362040282665619 0.3845703358532610 0.7020209701937329 0.0572876753938401 0.4646479856822819  
0.5868945787269068 0.5088187985540241 0.4208660551864422 0.6008534478186907 0.0607205166243773 0.5853884786758705  
0.5867433953669146 0.3675969264341891 0.4212545649685256 0.6153155113408200 0.0554407679800450 0.7771859745691394  
0.8118791421208930 0.6275712123742608 0.3737104015912212 0.7428189192109713 0.0599186458596996 0.7455358565337256  
0.8108380683771981 0.4983963182572574 0.4071937872233860 0.8738796854091277 0.8449125596089534 0.7334061946754034  
0.8108010026331101 0.3685187206523323 0.4241605817260092 0.8058007535070968 0.8536476479245189 0.5721819619857322  
0.0047376176291379 0.5435536646771326 0.2074712220265391 0.6961794918404456 0.8502191165025181 0.4717018242911911  
0.0036268056360947 0.3463185876552167 0.2053587277298082 0.5886806488273603 0.8425528426638670 0.5780106492891187  
0.8649533009139126 0.4376441701464596 0.7520262931496332 0.6165252811910324 0.8438575992979254 0.7677949569752739  
0.8082289606445474 0.4430981808768027 0.5814397247003736 0.7445189172388709 0.8408752296553110 0.7418438515598182  
0.7046416869454206 0.4365467257060456 0.4671996544617122 0.8044201145215225 0.9517364042312184 0.6975639637560220  
0.6119689771576141 0.4366966048111802 0.6027442327191926 0.5743901662695120 0.9510382745505287 0.6802948440144907  
0.6112152492649308 0.4498784514574206 0.7915926738057016 0.9160150106299919 0.1268426634211677 0.8916468854651517  
0.7338414832076814 0.4406097538882229 0.7384088809427007 0.9047070898090455 0.9977146205263914 0.9063311546342632  
0.8760075016808851 0.6513191445002132 0.7383661640930405 0.9003160798802572 0.8675934742910294 0.9210811196464987  
0.8063128633909643 0.6471453528244163 0.5794933554240687 0.6885404318491845 0.1309335674165929 0.8857566001094603  
0.6915066426598332 0.6508068400569189 0.4665424787109678 0.6952079265751284 0.0018474005220372 0.9059271467960353  
0.5866719657346018 0.6611814653042674 0.5758140007665595 0.6947133604031326 0.8717789293073147 0.9161559399943088  
0.6184564188644950 0.6565674503274138 0.7658454491965324 0.4976398685481864 0.0549476473385293 0.7024369828387210  
0.7474173151194612 0.6583198748844945 0.7519715616307587 0.4947973217673704 0.8505724926767206 0.7100321533002659  
0.8033024318858079 0.5467914061668786 0.7036008142895035 0.3730138344348563 0.4393707758680628 0.7485737259001238  
0.5752612271814195 0.5507488866417710 0.6774648630460369 0.3101527935609268 0.4502827511186605 0.9149481760877833  
0.9190699011922492 0.3730716280180991 0.8976804482172479 0.1988746275618455 0.4399069338118488 0.0116146741874375  
0.9025169745644348 0.5026710080183184 0.9094034994780230 0.0867787628659105 0.4392466349209201 0.9184567621847285  
0.9059092109503128 0.6330766560720322 0.9253063094626618 0.1142223493057142 0.4448139588867078 0.7281093039563650  
0.6887265430839551 0.3719803148506949 0.8906424994205139 0.2428350032038004 0.4394230712259260 0.7514137952737059  
0.7016307475173308 0.5010815843007247 0.9067317492693970 0.3738745110040103 0.6587315664490903 0.7601789831800116  
0.6911741729099812 0.6302600929647034 0.9218509630617705 0.3108759609394889 0.6384080196732047 0.9250860591902136  
0.4975172314309182 0.4464648460435925 0.6973738940163211 0.1943466845547671 0.6516608442718359 0.0401853168251816  
0.4957364855252485 0.6501682090485444 0.7098251508469694 0.0917303733237097 0.6597263363463829 0.9228814708795776  
0.6258964638508699 0.9481853726139184 0.2432238869751065 0.1183635385347142 0.6561982462310824 0.7324379900722257  
0.6906144016931928 0.9413993245754545 0.0775644694066054 0.2453478267975462 0.6598970997253527 0.7611081977278218  
0.7986919564500059 0.9396027860809040 0.9717828128610281 0.3083501525294342 0.5485074925055126 0.7838554240354699  
0.9057418774232397 0.9397984010542432 0.0790991449766063 0.0733858056023139 0.5506023038123733 0.8224804165069339  
0.8835789431680552 0.9446893727872397 0.2692675909211039 0.4185405064020200 0.3724147360211110 0.5961984013746244  
0.7555821655336727 0.9458638222542620 0.2444220473527093 0.4089918068890629 0.5023331774643002 0.5855747558055616  
0.6259527302365167 0.1541040634489098 0.2373272098420648 0.4030552518114162 0.6321396489759967 0.5746553367724067  
0.6925013328443457 0.1588118099880186 0.0748338428952192 0.1857164045426466 0.3722800749997370 0.6102984999594883  
0.8014844193459305 0.1553116278822648 0.9708131008974680 0.1922763589817009 0.5018423817876950 0.5980916893276915  
0.9074972002377841 0.1618704376581069 0.0782951824238151 0.1979661611176309 0.6315133269760391 0.5841481584179695  
0.8834515762050247 0.1557820877010573 0.2686562978417805 0.9916786490284919 0.4517061952484641 0.7900136097789802  
0.7555097099869896 0.1570287819574890 0.2430621693608999 0.9977790151351508 0.6539292918459009 0.7911488596913718  
0.6942775732303744 0.0508256818109236 0.1818067400669547 0.1272038679326928 0.5591593793070220 0.2577082439756767  
0.9256935821249020 0.0505881310512978 0.1744680415108715 0.1908930673720454 0.5605400216426062 0.4251012355212931  
0.5824596786231343 0.8734743508005122 0.3894861317913894 0.2993396113316707 0.5588198920611730 0.5302046179477901

|                    |                    |                    |                    |                    |                    |
|--------------------|--------------------|--------------------|--------------------|--------------------|--------------------|
| 0.4020861535421378 | 0.5622536403533327 | 0.4138889412305564 | 0.1225190440734442 | 0.0615364187804672 | 0.0289255384431427 |
| 0.3834823242947783 | 0.5414997327804871 | 0.2256711228948580 | 0.0686863785296833 | 0.0274195455761829 | 0.8189893376303267 |
| 0.2561634471289663 | 0.5513621735938846 | 0.2601189659991955 | 0.1853455938404419 | 0.0595853233637437 | 0.6761919465796705 |
| 0.1243772890137357 | 0.3432210634535948 | 0.2641500554632652 | 0.4236066888920556 | 0.8264978048081725 | 0.6760603170050793 |
| 0.1947432351840911 | 0.3408763144415419 | 0.4226096157221593 | 0.3099139341089691 | 0.8698432583935142 | 0.8150730845775206 |
| 0.3006707599053056 | 0.3457136239487575 | 0.5315603161973637 | 0.2754381134937325 | 0.8280597002021395 | 0.0315109594405909 |
| 0.4019562418666621 | 0.3329376398593863 | 0.4120226089525138 | 0.1198755612932763 | 0.8238500696240884 | 0.0294849555533730 |
| 0.3801924584900218 | 0.3575986519168011 | 0.2241009142081129 | 0.0691407738245075 | 0.8693368373019100 | 0.8192704040474628 |
| 0.2532915272689151 | 0.3532873217165271 | 0.2500914017862204 | 0.1881199477783008 | 0.8271638010518773 | 0.6852818699576078 |
| 0.1847858867549326 | 0.4508579216348218 | 0.3214176211439333 | 0.0773776902409590 | 0.9406113244932346 | 0.1663377920004313 |
| 0.4335097818336145 | 0.4473970189895701 | 0.3378034611781999 | 0.1883437554891000 | 0.9707013183240305 | 0.3161439605210557 |
| 0.0770452995902511 | 0.6273303386541095 | 0.1098643238053682 | 0.2205467965969005 | 0.9394962442092116 | 0.5351331374536854 |
| 0.0979538989395207 | 0.4989686003118195 | 0.0905412404087758 | 0.3775361918524649 | 0.9366395832801866 | 0.5304047867077306 |
| 0.0994453365372103 | 0.3686586344091183 | 0.0772090862421149 | 0.4246806424196537 | 0.9699663829006498 | 0.3167025443205118 |
| 0.3167375230824581 | 0.6299580815727253 | 0.1320355108733703 | 0.3096327841891705 | 0.9416832969944503 | 0.1747490447662052 |
| 0.2972924131431764 | 0.5065951379376649 | 0.0869822829397466 | 0.0779329564138305 | 0.1715990507884714 | 0.1757414082951599 |
| 0.3036295474441141 | 0.3767867717403786 | 0.0742379086101119 | 0.1894181702478314 | 0.1292327177955762 | 0.3211398757589997 |
| 0.5024008583484820 | 0.5533245561380391 | 0.2889126822363616 | 0.2215971501949696 | 0.1728643074452260 | 0.5358177596478374 |
| 0.4995780069079278 | 0.3401147374637981 | 0.2835718195573811 | 0.3753033306176493 | 0.1738108221368702 | 0.5272730743123647 |
| 0.4248248866942325 | 0.7500812633443624 | 0.6441712642109862 | 0.4302760498669100 | 0.1260427161623895 | 0.3220976345278336 |
| 0.1884177232432397 | 0.7508954130233745 | 0.6516976699077645 | 0.5730356744113818 | 0.5608654961164344 | 0.3347892073462923 |
| 0.2934716903250685 | 0.7528054929282184 | 0.0501286461237634 | 0.6850254129986931 | 0.5222442308981008 | 0.1853573283756486 |
| 0.1071982608900950 | 0.7485548440131971 | 0.0606412755541467 | 0.7202448212734754 | 0.5635170399199789 | 0.9699255316997429 |
| 0.0811615392741450 | 0.2494569628038418 | 0.1459414444267768 | 0.8768235710536073 | 0.5650636449428781 | 0.9677586286706494 |
| 0.3126641254034928 | 0.2578755356429424 | 0.1503932875409320 | 0.9293764865193926 | 0.5247098730000781 | 0.1749583136409770 |
| 0.2129036277374647 | 0.2508986064846302 | 0.5596786697232217 | 0.8111312730402364 | 0.5512806004963962 | 0.3165062763221905 |
| 0.3873396193773851 | 0.2498599264601416 | 0.5577198448504942 | 0.5718017002917162 | 0.3232174187973650 | 0.3244804099479047 |
| 0.5762955026194346 | 0.2472666694688177 | 0.3520760078706242 | 0.6862808842734567 | 0.3654154500382980 | 0.1838895786612847 |
| 0.8111200480757200 | 0.2500504610875321 | 0.3477870965382350 | 0.7254727261140307 | 0.3249361804123571 | 0.9673937149654968 |
| 0.7143257593641456 | 0.2509443843555876 | 0.9432276681528028 | 0.8789531216715248 | 0.3235116032988148 | 0.9700937888043577 |
| 0.8889934824455399 | 0.2489834844480884 | 0.9362770547448590 | 0.9289705827006041 | 0.3678623934494089 | 0.1781546754713742 |
| 0.9190073809983238 | 0.7502414112021364 | 0.8477604297738829 | 0.8115957551933211 | 0.3286706604453364 | 0.3161831933503714 |
| 0.6860909745860738 | 0.7507756348609878 | 0.8517762579407722 | 0.9182743211730061 | 0.4398466356456955 | 0.8351214514935108 |
| 0.7852694869070028 | 0.7545562650007461 | 0.4513863311506264 | 0.8053222969647998 | 0.4651984565960151 | 0.6884771640468376 |
| 0.6100233027403184 | 0.7529513044285305 | 0.4435459165323882 | 0.7819335360571872 | 0.4367547002292203 | 0.4654704413703245 |
| 0.7738291784722229 | 0.6709284166880749 | 0.4683342352030510 | 0.5706965980133383 | 0.4726273930979117 | 0.6952301888406043 |
| 0.6215167336556210 | 0.4383464815510554 | 0.4643464393040679 | 0.6866125027050123 | 0.4403983554418016 | 0.8296889089752314 |
| 0.2746177243933803 | 0.6723351748952725 | 0.0258982621655570 | 0.9234205716665709 | 0.6718710571927708 | 0.8179821249770037 |
| 0.3056246506822849 | 0.1756093273270011 | 0.1738111232514870 | 0.8089034177474208 | 0.6234120580980987 | 0.6849615595551923 |
| 0.4235075218849715 | 0.1730631456795168 | 0.1748345046771203 | 0.6156777344138032 | 0.6760587612283663 | 0.4627992639868724 |
| 0.3487670498532804 | 0.6582388735356406 | 0.1629880382751132 | 0.5701162094051042 | 0.6299625947711462 | 0.6791550327253961 |
| 0.6556633510742964 | 0.4243879307434885 | 0.6253666813880597 | 0.6879200931720595 | 0.6722317109039995 | 0.8192960733790102 |
| 0.9712213413502936 | 0.7176769995543844 | 0.3557690107923089 | 0.5734731943159070 | 0.9445293705951774 | 0.3348966284192348 |
| 0.8982724151018748 | 0.7386599505616950 | 0.4294769930958283 | 0.6893063346689791 | 0.9721501140108095 | 0.1884446531247641 |
| 0.0119982706318958 | 0.6476487006541796 | 0.4913038383484125 | 0.7180508812996763 | 0.9357493403880875 | 0.9689581899312809 |
| 0.9369606742286577 | 0.6654646694016791 | 0.5626091638245030 | 0.8753955752570245 | 0.9345433022205896 | 0.9659757023968242 |
| 0.9437997363113996 | 0.7117023642878127 | 0.4233774142956730 | 0.9287751556324042 | 0.9707117621547537 | 0.1776022046143149 |
| 0.9654665870211684 | 0.6728937276549189 | 0.4962875045969934 | 0.8135364530874409 | 0.9441587687017832 | 0.3240395651933553 |
|                    |                    |                    | 0.5770089211947727 | 0.1695415376985609 | 0.3290173227499468 |
|                    |                    |                    | 0.6904211509314944 | 0.1305300369412040 | 0.1826342764995121 |
|                    |                    |                    | 0.7248654446917303 | 0.1724092766885936 | 0.9674663212715255 |
|                    |                    |                    | 0.8786964779030643 | 0.1724441023032790 | 0.9709621720973580 |
|                    |                    |                    | 0.9302952888732249 | 0.1289485248817394 | 0.1808680753320078 |
|                    |                    |                    | 0.8126591804973065 | 0.1729748899048722 | 0.3148009894460047 |

## ET on LAS + H2O (T2)

|                    |                    |                    |
|--------------------|--------------------|--------------------|
| 0.4238907003795050 | 0.0589884724800213 | 0.6605212764870255 |
| 0.3096531447644719 | 0.0272518161877399 | 0.8056900411783066 |
| 0.2790168900152002 | 0.0597365575316961 | 0.0266281534460991 |



0.9205581313936445 0.0576976353205170 0.8321480024544655 0.1993438980372278 0.8716612368662842 0.5884306312127644  
0.8078750531994541 0.0323190208864532 0.6864884809254019 0.9944616520794274 0.0481488841741443 0.7929328857451130  
0.7805016654596610 0.0636191339682590 0.4641094275176555 0.9962502183062637 0.8472433016082503 0.7880965751207833  
0.6240860781169362 0.0615435489333457 0.4720201541618902 0.1243349007283448 0.9417615809378485 0.2615100489525134  
0.5720878507375979 0.0298151838740525 0.6857699925315929 0.1912792732528367 0.9395105005008314 0.4254450034481373  
0.6865826006307099 0.0582113922991019 0.8276384028831268 0.2993865166196531 0.9446608834440903 0.5319367798489203  
0.9222986206509965 0.8271715388633883 0.8176324866747893 0.4036414744729246 0.9351464204430845 0.4184210107956067  
0.8076628075478279 0.8738732439499184 0.6843925569549345 0.3806282760316972 0.9442342544586245 0.2274366433890596  
0.7714417114120294 0.8306119680411992 0.4653708734015026 0.2537663733572778 0.9489910172131391 0.2580627275612906  
0.6170850277702060 0.8289647200410247 0.4661203639906947 0.1250952744004366 0.1589045217640448 0.2680571389138662  
0.5701191324150224 0.8715400546903492 0.6832838191441238 0.1870758169345240 0.1552211709464180 0.4335603369944680  
0.6872573658185891 0.8267075897184674 0.8204599300439709 0.2989687897062753 0.1545338254758577 0.5299301939510882  
0.4225717330660428 0.4401790155600732 0.6569622612428362 0.4030412580757019 0.1644200340879794 0.4157949826084845  
0.3077399654007853 0.4699371207817641 0.8001771653922665 0.3915232004072302 0.1576870308916265 0.2220746829824681  
0.2758557637254264 0.4425641708140328 0.0219867859762520 0.2556825350439424 0.1522143032209545 0.2691679235893631  
0.1193962371799693 0.4365799155732988 0.0260758309958425 0.1837783682425309 0.0496589853731282 0.3218122461897466  
0.0659196942891044 0.4713908252139358 0.8152499991783075 0.4140884418262459 0.0493327415116347 0.3283455848472608  
0.1832872843308447 0.4396607068828430 0.6728552842403502 0.0856024880176144 0.8710929946312617 0.1098977859624555  
0.4241746120051836 0.6725474298784062 0.6725566489813797 0.0945746127908592 0.0007334896429754 0.0931052528392193  
0.3098593677243442 0.6264935527507569 0.8101323354362560 0.1033818119175378 0.1305786930191319 0.0810632312815097  
0.1180445589960501 0.6713206147342926 0.0328680807200108 0.3035350481489621 0.8708896982505479 0.1221736527750109  
0.0699276763230623 0.6297325515323191 0.8184316065892007 0.3046690070612910 0.0000126213228803 0.0955931344800642  
0.1881877205024390 0.6742894490138461 0.6838334557279088 0.3011153702793178 0.1290309250249592 0.0701405603269083  
0.0756949904831186 0.5570597605392920 0.1665341569516038 0.5004928106004943 0.9549582719586749 0.2926410797970079  
0.1868077261964413 0.5294143222008310 0.3172001801717731 0.5054608426739874 0.1408912430726928 0.2964876947982892  
0.2196835748540853 0.5624574877486209 0.5358134791065292 0.6254252478514994 0.5549747496870074 0.2455574174715844  
0.3769504522357538 0.5635764602966878 0.5277134055625453 0.6869101822146316 0.5542213964320402 0.0764631341221905  
0.4293213553086337 0.5255515494999776 0.3185451139632708 0.7985133906409491 0.5683048749961715 0.9807398192846253  
0.3104273763354809 0.5524713222190304 0.1794151659706400 0.9113046127313358 0.5613208196649412 0.0735513855788779  
0.0759309755759109 0.3263721064342302 0.1733737079578118 0.8809876141435415 0.5485320662658150 0.2608286381357580  
0.1887617030962148 0.3712640903434363 0.3144497867573223 0.7542089510114807 0.5340478214981118 0.2383695477734834  
0.2230598814984835 0.3268820957787869 0.5307383630470727 0.6238989922116435 0.3308473945365716 0.2348390763119301  
0.3763303996546071 0.3254175000811335 0.5233612905111638 0.6930204048850703 0.3370905224318007 0.0735992015777589  
0.4283568144303402 0.3695326238511136 0.3141372850573921 0.8023028852743338 0.3437871337407224 0.9694693780659392  
0.3110472075553829 0.3345877205521729 0.1749137178635918 0.9070857119762756 0.3297646907538587 0.0797914426227024  
0.3736692352940414 0.0575201871351523 0.7517729472825770 0.8811169165220590 0.3471633041327747 0.2668344875444709  
0.3109530791742097 0.0491196440956042 0.9186351005622048 0.7527025666919559 0.3497993322685631 0.2433368830708378  
0.2001881155775586 0.0539982727692602 0.0174396460189225 0.6733111633247525 0.4436724891515038 0.1780092774200575  
0.0890684497584131 0.0608797892155160 0.9218742756278204 0.9243176957865797 0.4461221752432685 0.1585792044377575  
0.1159529591479066 0.0529688672861597 0.7318561240067407 0.5767045547024250 0.6347574051029626 0.3804144488949992  
0.2441621302543166 0.0547810189680397 0.7544741702872946 0.5839209830371311 0.5076312594844802 0.4194853793950832  
0.3750224776334744 0.8370571821954809 0.7683123759737973 0.5902611145977499 0.3665734749389057 0.4176193165960282  
0.3086362853505950 0.8552886408185805 0.9308088640504716 0.7998868798848061 0.6237932561460153 0.3592741115995631  
0.1970509452861182 0.8397056170681639 0.0233996377632616 0.8136539038105731 0.4963931857875078 0.4024929153022272  
0.0877466399210557 0.8361342594407329 0.9228457179756113 0.8055280852905459 0.3668001634672229 0.4196232986063010  
0.1183672578224993 0.8446671967986548 0.7341460104348737 0.0026731175717170 0.5443177238657158 0.2079172749961588  
0.2455721882844377 0.8388431146316128 0.7643694148436492 0.0027598209511861 0.3474109414148505 0.2057854133650462  
0.3115059564998378 0.9480298548895488 0.7939651729526164 0.8652269407817917 0.4325047232736011 0.7480408832884725  
0.0737498637303595 0.9483332621662950 0.8289814806965418 0.8099588116853456 0.4406652182437683 0.5767155453330554  
0.4159490727155352 0.1275681933140485 0.6008696481215510 0.7044866303192479 0.4417306600991050 0.4665193699013195  
0.4110523069515511 0.9982027301417983 0.5862313884149271 0.6113401179618601 0.4359941222419367 0.6006263760914136  
0.3990953185365050 0.8685409318453866 0.5821876872947248 0.6120479868160758 0.4490649007467276 0.7890319964952095  
0.1882180366927773 0.1309425903318498 0.6233898784446099 0.7342766055760022 0.4403481379302435 0.7329764432974698  
0.1918779709519421 0.0019310935187160 0.5947519333063569 0.8772718968718241 0.6524204025250884 0.7265935957056888

0.8011222191980024 0.6431483568724992 0.5731133673271471 0.6905668922208708 0.1277897429644541 0.8846947875658118  
0.6917552767109201 0.6587078824685129 0.4610798477251051 0.6946304932841015 -0.0016249203489216 0.9046840998439601  
0.5871551659792884 0.6592544134372793 0.5722941338745677 0.6894340049645644 0.8684497864902970 0.9220240741898085  
0.6202083212353884 0.6570942452623936 0.7610259800519138 0.4978304637987782 0.0547633338379096 0.7011790561925013  
0.7491182900990754 0.6509752359397669 0.7517662753214616 0.4963089726229405 0.8490955056913747 0.7081324558939894  
0.8092239061319053 0.5439070728602892 0.6990023187603230 0.3727859483080747 0.4391257881940361 0.7490624493142476  
0.5751051351127519 0.5500529977972569 0.6765059445983996 0.3087880170572846 0.4503646094349827 0.9150301950418708  
0.9186241909525746 0.3719906147950447 0.8973368836005148 0.1976231190415508 0.4402040779526088 0.0129065466784324  
0.8974863933357681 0.5010198338742194 0.9044749205864385 0.0855442062088687 0.4393901993157986 0.9196973510227004  
0.9017540259914367 0.6316719042537944 0.9152593384279898 0.1138749228584290 0.4438934295599071 0.7297032266390595  
0.6901384705831596 0.3706928696104547 0.8857587211142679 0.2426082826018015 0.4394005960781344 0.7511370936695169  
0.7039700419274129 0.5000433212776050 0.9019343347181612 0.3750319652375966 0.6583754929824700 0.7621041002521073  
0.6901000814022801 0.6289459007936981 0.9195391122311790 0.3103468887509972 0.6376626591776047 0.9252401462437656  
0.4973266608344422 0.4460022542868677 0.6970727109570447 0.1932159863400860 0.6508813692906901 0.0378141992652819  
0.4964545362968917 0.6502476444364338 0.7077554174361090 0.0887372647010742 0.6596875478073563 0.9237607146056613  
0.6243826472390724 0.9464074993596617 0.2443957986546086 0.1191437481802651 0.6555878748080741 0.7340871200928251  
0.6897649884696609 0.9414066835340030 0.0794018943928936 0.2465609599284114 0.6606001080381915 0.7600413864926228  
0.7968053610442724 0.9345690081165025 0.9722295766453788 0.3084007667640611 0.5484286357739547 0.7833398448955571  
0.9060001489497825 0.9388744274230928 0.0744658151459204 0.0728800723065472 0.5503132105941539 0.8225206606380017  
0.8818844693688209 0.9443586559124700 0.2645699118369636 0.4180067612043959 0.3722601596958798 0.5959064542983770  
0.7536439979616720 0.9498310848806097 0.2473736984173321 0.4085877263477743 0.5020305793028712 0.5858967048444348  
0.6260156016406314 0.1582533492020277 0.2377984395869364 0.4018935805772492 0.6317425138179839 0.5757742646168449  
0.6900703706607214 0.1590596664246463 0.0723087565874034 0.1852455687371582 0.3719645099693230 0.6104124929188909  
0.8016318419072745 0.1539592390661680 0.9746473093476611 0.1908443021818160 0.5016521173421049 0.5988861067952114  
0.9088183159804865 0.1634132399229117 0.0791230282899001 0.1975819690646863 0.6313292453462079 0.5845491350788413  
0.8831519774237323 0.1541321525917168 0.2687942433142472 0.9908939691807768 0.4516633531441016 0.7903586550136870  
0.7560883055986382 0.1542540474819041 0.2369404741058297 0.9975515263952733 0.6533778652151530 0.7876815096538369  
0.6875246429603696 0.0514329988792373 0.1813105397158793 0.1244798912891008 0.5586653869618717 0.2601723629750094  
0.9243053534182558 0.0500307452563147 0.1698743261058111 0.1898544358957202 0.5602686244427815 0.4260489756495525  
0.5766198637824763 0.8743911116569485 0.3905588747153786 0.2984594341575974 0.5579342209356696 0.5311164839517944  
0.5890571756562873 0.0023424758636956 0.4131994139451118 0.4008830067750595 0.5625302035584021 0.4146555022045887  
0.6012415184872818 0.1312544799769824 0.4259589864791636 0.3808079015915248 0.5416889690746257 0.2270337799507615  
0.8086828709779866 0.8764295662971265 0.3847185091885225 0.2533934083440089 0.5510558190045894 0.2596526526015354  
0.8130407594044493 0.0057441621107431 0.3994398445086607 0.1237668199361793 0.3421790316742933 0.2643752331328991  
0.8007459611153362 0.1340144495294900 0.4170763788943027 0.1939583441785481 0.3401913939439136 0.4227921126729517  
0.0023526072346325 0.9476999042121558 0.2023888879597560 0.3001430732525133 0.3461394793727234 0.5306651802763267  
0.0044944419002229 0.1494723661220490 0.2058825064479779 0.4018975322298894 0.3324209752619873 0.4117440918376650  
0.8722085017804490 0.0619249906445888 0.7388429687982593 0.3797769099845454 0.3570806688616061 0.2237000076485894  
0.8059376950323113 0.0604498368349398 0.5757055033476656 0.2527881984964284 0.3544772852036330 0.2505823268436179  
0.7020057997555949 0.0542328017913288 0.4622442596808931 0.1828249406544536 0.4505219661805033 0.3227785019170901  
0.6018573742176937 0.0598403539646158 0.5852575993241980 0.4312819093036045 0.4475563898808009 0.3382486684006065  
0.6153231053560768 0.0545208943440916 0.7772705744885051 0.0766551325445616 0.6270400228462477 0.1107827070432730  
0.7425060543778405 0.0556339228754194 0.7437721143943209 0.0962016866780036 0.4981760235815507 0.0925988215117316  
0.8756216266809294 0.8442276728013545 0.7255258024170087 0.0988094396025693 0.3679390512293773 0.0775947595663886  
0.7982198943144407 0.8517105854346804 0.5724940613736459 0.3144716297049076 0.6303063307403095 0.1328913979055930  
0.6936691053559600 0.8469988579537815 0.4566887141485915 0.2960093862563826 0.5072882444252579 0.0865443164297198  
0.5918221716982381 0.8419802340579207 0.5776742422209349 0.3027434673954194 0.3773137293428136 0.0746303253980837  
0.6185764513730139 0.8416410451463200 0.7652366811333726 0.5000910747050835 0.5534253937447586 0.2881424005157864  
0.7482790762032999 0.8505187549472389 0.7542743026135066 0.4994993171628064 0.3421163572671569 0.2833633436906964  
0.8114119495458317 0.9532208625798740 0.6877516619114833 0.4244919464667637 0.7497629520060529 0.6443812177514325  
0.5746078759946990 0.9504837710123425 0.6805795252516308 0.1880563698888592 0.7508084644738828 0.6516657270506819  
0.9159579967614271 0.1255622580746955 0.8937915281628207 0.2928189898224793 0.7523150697262635 0.0494270284210425  
0.8995465892307581 0.9968807653850954 0.9019442486768153 0.1069766665014788 0.7482310281613436 0.0615254107971403  
0.8998400864267153 0.8669409435453399 0.9151381846792921 0.0787241172674088 0.2490103266426836 0.1468023290812650

0.3109742005194940 0.2581863510128516 0.1509481469359827 0.3751586007257613 0.1729773506102543 0.5286938256661787  
0.2132232972528821 0.2505057515401064 0.5600428782582517 0.4306228301041322 0.1259259588053596 0.3232374634792508  
0.3862544133890274 0.2498437607025287 0.5578590239839736 0.5731672073748917 0.5605725211775272 0.3396760781479577  
0.5701535440994785 0.2459746899100678 0.3553066881650571 0.6901440155735211 0.5262032233575407 0.1970099124716123  
0.8089799493349895 0.2506360604850739 0.3378236389116878 0.7204010843603013 0.5639716596401282 0.9761226801751428  
0.7153417608906731 0.2487833317077511 0.9365734852465923 0.8775518301946713 0.5654915107518106 0.9716172851180666  
0.8880021316551856 0.2479507825860791 0.9351094991340527 0.9297865537986912 0.5240608309416246 0.1805295927313987  
0.9178253484865608 0.7494585017856693 0.8417453864496529 0.8163941981792114 0.5534795339034301 0.3292199341710133  
0.6908221831444674 0.7492982704698836 0.8490209624258630 0.5730588285331463 0.3243099034011460 0.3272766229235363  
0.7883921575214418 0.7558787161097273 0.4397503720517880 0.6905750678160362 0.3676426912397108 0.1925427547064489  
0.6016313202638851 0.7531576708892866 0.4399174702449700 0.7257062509424008 0.3268654618779255 0.9731645292605852  
0.9001941865293174 0.6921911173539423 0.4354092502751674 0.8792924033402753 0.3243812964495579 0.9750150754470005  
0.6950991031669810 0.7526130402775579 0.6258947221874617 0.9286888896070546 0.3671072157686592 0.1844093980961515  
0.7766571115251995 0.6720565342792820 0.4593128351432276 0.8141351982192997 0.3258629251408343 0.3249630315969646  
0.6214892746335651 0.4384516202371219 0.4622075091741851 0.9192854486328115 0.4399484209409553 0.8398920979737937  
0.2735386265846927 0.6719810261622585 0.0252590504280782 0.8055273259161440 0.4648524994120296 0.6952952776663830  
0.3048251327962965 0.1757845085875755 0.1740929138137071 0.7834082194465545 0.4348481196422598 0.4713811846869438  
0.4233825240608902 0.1731843807516356 0.1744680328002601 0.5709008281256543 0.4721223621144708 0.6982326968803818  
0.3448552153030194 0.6593979324523360 0.1658794890674168 0.6859279563207241 0.4411752814808507 0.8352673486385110  
0.6555078376547727 0.4248296093743376 0.6226766708121861 0.9249097790659835 0.6720657352442743 0.8238805152519634  
0.9277876618196657 0.5833125094298740 0.5260477085831424 0.8082231817130943 0.6230478624586424 0.6959981582334247  
0.0138658131357203 0.5884338263925767 0.5149091860796539 0.6157097069747116 0.6755888198643552 0.4638637013923025  
0.9649137055266030 0.5773259676461050 0.4088130981054082 0.5715781351900031 0.6293600705034460 0.6823950651542871  
0.9715348150388403 0.6997884673730848 0.5396401640241230 0.6867811854539262 0.6715608005896794 0.8279955496254935  
0.0004246342243790 0.6943829821740782 0.4175165995602390 0.5737685911393472 0.9443925487821261 0.3361557634914611  
0.8989629545322095 0.7358147489896157 0.4060281553951318 0.6902470214318608 0.9710291092669122 0.1908031580079845  
0.6919648803109889 0.7053586506218037 0.6183854155524565 0.7179595167047281 0.9371980624194420 0.9700245290810309  
0.6504224687182639 0.7680733109933360 0.6302304202487174 0.8753992868636424 0.9356220487944426 0.9672540963529697  
0.9677442651781084 0.6014458886911720 0.4802358961053347 0.9284944653969447 0.9697109597605137 0.1796655273654756  
0.9636306159639519 0.6749688503300704 0.4685768192563254 0.8132817000180045 0.9408208538868955 0.3261038037906322  
0.5775556466133621 0.1696033061266661 0.3310622985890608 0.6921479352128499 0.1295509522819560 0.1874342782841040  
0.7247596794649006 0.1733714555488574 0.9714803459430077 0.8789441053101155 0.1732312923056873 0.9727973288180255  
0.3091659338119649 0.0270772091372679 0.8071192573521553 0.9305036592552939 0.1280141615548329 0.1826442338189210  
0.2793429057552792 0.0593325302205398 0.0286591760375854 0.8142896632557535 0.1710656504144555 0.3204999870143980  
0.1226749944930843 0.0610633735038555 0.0303266969270180 0.9211764665066768 0.0588432612344498 0.8343950176823897  
0.0689954511967234 0.0275643952127207 0.8198413837662110 0.8074972151379262 0.0318715225345191 0.6919275632990350  
0.1852491478652791 0.0596051563801093 0.6766392403847223 0.7801834509550875 0.0605562604773776 0.4675703219072294  
0.4231062131210523 0.8260481366127809 0.6761289035930724 0.6233945664467825 0.0616811828201329 0.4740596398009199  
0.3101034499634596 0.8696926828989301 0.8160789196112143 0.5716584654058272 0.0300552819731208 0.6887288681522283  
0.2754715009680946 0.8276849013652128 0.0321619500524188 0.6860225101892327 0.0603393714068091 0.8303482846071046  
0.1200397300328199 0.8235240539565745 0.0296369502102584 0.9223795831679205 0.8271204010770193 0.8196761975930639  
0.0690358578367674 0.8694392093112443 0.8198499909431936 0.8065836061876949 0.8737939061089782 0.6897303932533166  
0.1882820916299853 0.8271004377733548 0.6860846754803199 0.7731801753641627 0.8293371271758638 0.4700662180177477  
0.0771240346962993 0.9401010023622864 0.1669414463167563 0.6179329758906078 0.8283605624321347 0.4680801181724708  
0.1881227202375374 0.9706382230252867 0.3167518973262654 0.5703928110650754 0.8717003541062651 0.6857164597935923  
0.2203500205887032 0.9395920747829669 0.5355732673596149 0.6858639385344555 0.8258574582674992 0.8246452035761110  
0.3772605280321810 0.9364837262724348 0.5317123038475401 0.4230100078963268 0.4394118851752574 0.6585256243349320  
0.4250510557888241 0.9694222861003228 0.3178063024105419 0.3080213884778871 0.4699321524546233 0.8010947395229363  
0.3098025476591649 0.9412956656318812 0.1757363418408081 0.2771111653884937 0.4418959497416329 0.0233450933724961  
0.0781406312317734 0.1714740959898245 0.1762473433513959 0.1205614358527006 0.4360544411116840 0.0267374015358218  
0.1893249216858181 0.1290250524716714 0.3222197304544391 0.0666615231545324 0.4710255388459293 0.8161066096020125  
0.2214845946510074 0.1727331570932532 0.5365206669783322 0.1836844531506125 0.4396565808659936 0.6732866980888540

**DEE on LAS + H2O (T2)**

0.4235592946100366 0.0584644184817743 0.6627788434289357 0.4235592946100366 0.0584644184817743 0.6627788434289357  
0.3091659338119649 0.0270772091372679 0.8071192573521553 0.3091659338119649 0.0270772091372679 0.8071192573521553  
0.2793429057552792 0.0593325302205398 0.0286591760375854 0.2793429057552792 0.0593325302205398 0.0286591760375854  
0.1226749944930843 0.0610633735038555 0.0303266969270180 0.1226749944930843 0.0610633735038555 0.0303266969270180  
0.0689954511967234 0.0275643952127207 0.8198413837662110 0.0689954511967234 0.0275643952127207 0.8198413837662110  
0.1852491478652791 0.0596051563801093 0.6766392403847223 0.1852491478652791 0.0596051563801093 0.6766392403847223  
0.4231062131210523 0.8260481366127809 0.6761289035930724 0.4231062131210523 0.8260481366127809 0.6761289035930724  
0.3101034499634596 0.8696926828989301 0.8160789196112143 0.3101034499634596 0.8696926828989301 0.8160789196112143  
0.2754715009680946 0.8276849013652128 0.0321619500524188 0.2754715009680946 0.8276849013652128 0.0321619500524188  
0.1200397300328199 0.8235240539565745 0.0296369502102584 0.1200397300328199 0.8235240539565745 0.0296369502102584  
0.0690358578367674 0.8694392093112443 0.8198499909431936 0.0690358578367674 0.8694392093112443 0.8198499909431936  
0.1882820916299853 0.8271004377733548 0.6860846754803199 0.1882820916299853 0.8271004377733548 0.6860846754803199  
0.0771240346962993 0.9401010023622864 0.1669414463167563 0.0771240346962993 0.9401010023622864 0.1669414463167563  
0.1881227202375374 0.9706382230252867 0.3167518973262654 0.1881227202375374 0.9706382230252867 0.3167518973262654  
0.2203500205887032 0.9395920747829669 0.5355732673596149 0.2203500205887032 0.9395920747829669 0.5355732673596149  
0.3772605280321810 0.9364837262724348 0.5317123038475401 0.3772605280321810 0.9364837262724348 0.5317123038475401  
0.4250510557888241 0.9694222861003228 0.3178063024105419 0.4250510557888241 0.9694222861003228 0.3178063024105419  
0.3098025476591649 0.9412956656318812 0.1757363418408081 0.3098025476591649 0.9412956656318812 0.1757363418408081  
0.0781406312317734 0.1714740959898245 0.1762473433513959 0.0781406312317734 0.1714740959898245 0.1762473433513959  
0.1893249216858181 0.1290250524716714 0.3222197304544391 0.1893249216858181 0.1290250524716714 0.3222197304544391  
0.2214845946510074 0.1727331570932532 0.5365206669783322 0.2214845946510074 0.1727331570932532 0.5365206669783322

0.4246388922925686 0.6721203191145840 0.6740788014004162 0.0929134273298468 0.0007224716199033 0.0939352915042473  
0.3105008383160950 0.6264050747237188 0.8114792257757011 0.1036674375396933 0.1303307596028420 0.0817765896340922  
0.1188983437897527 0.6709868674730435 0.0342058843824737 0.3031859546380982 0.8706541288257250 0.1230494351163101  
0.0711600566184574 0.6294316514559386 0.8193775138325781 0.3064526497091866 -0.0001628244455732 0.0967615301138428  
0.1891236632157755 0.6742141524505115 0.6843040444794668 0.3010433434483747 0.1287842848523768 0.0716800303683264  
0.0769202115260549 0.5568403496805162 0.1664083957631506 0.5007188166767350 0.9533955398568051 0.2936418581935697  
0.1876007214722591 0.5293677760172084 0.3177415229182478 0.5057032990333602 0.1420611581715923 0.2986233428551168  
0.2202933744203681 0.5622582165204857 0.5362530900342110 0.6271788119051925 0.5567765073544271 0.2520605620524666  
0.3776042854189106 0.5627493984682195 0.5289222408393243 0.6917167585183517 0.5538444744427871 0.0854031300091622  
0.4301249509132841 0.5245375974800447 0.3202086759853592 0.7990114519527485 0.5702966642546577 0.9802402823845978  
0.3115538059779162 0.5519396736765108 0.1807526044628259 0.9085462956343371 0.5601736011892742 0.0798424965293898  
0.0761873084761280 0.3261769771620380 0.1742341967954227 0.8842880987939662 0.5510455705702252 0.2679121974100672  
0.1893893728324101 0.3712953067545781 0.3145669848758613 0.7567379414081470 0.5470994848265610 0.2514912120222386  
0.2236127191806076 0.3268082131465598 0.5311324889512250 0.6255279373807197 0.3352959970415398 0.2388940032841839  
0.3769342560087960 0.3244934173842821 0.5251045713706312 0.6962631413431541 0.3427604153561066 0.0802188557330718  
0.4289977857106512 0.3687126626264114 0.3163705277952102 0.8027868085951059 0.3445950934210455 0.9700474969102441  
0.3120489084525797 0.3340863424087206 0.1759970927125704 0.9044090584356357 0.3298531284818826 0.0865200124006741  
0.3731768830796798 0.0577607958166115 0.7537461086643941 0.8834956751273314 0.3446789271710117 0.2753147387384466  
0.3101108008470808 0.0491419940072076 0.9198926179015406 0.7551132891785345 0.3450492030551739 0.2515087032619214  
0.2003692506784348 0.0524668177067239 0.0216092174698686 0.6843355444003794 0.4467806534530102 0.1950915029196428  
0.0904675306052509 0.0606471506116023 0.9224946576285088 0.9222834175893925 0.4455197323133185 0.1671709081996805  
0.1157858112644662 0.0527828096585449 0.7320525521247221 0.5717092534291958 0.6338349491689894 0.38778480545254565  
0.2437916569695739 0.0543028485752187 0.7552715915565263 0.5852849726570134 0.5069882699049568 0.4236507887038028  
0.3754379341162082 0.8373180238506809 0.7691849829090464 0.5904263067864921 0.3661014435848985 0.4225381295237742  
0.3088969062971134 0.8551495459315088 0.9317531177149933 0.8144935475701885 0.6216680401532693 0.3874601645028867  
0.1970505843897309 0.8397196925362149 0.0233869193977800 0.8165583232880299 0.4921357909738301 0.4049660052845953  
0.0873484392781749 0.8360854920288110 0.9234532172882970 0.8074671798481651 0.3642012868720733 0.4283402927875977  
0.1186048616998726 0.8448849395755141 0.7351950250379171 0.0041360546201205 0.5429765646711033 0.2077654668887146  
0.2458771169150613 0.8385903303959273 0.7650621916420270 0.0032952401101743 0.3474424019413239 0.2076270015531086  
0.3116519526927866 0.9479295939069100 0.7952103565414257 0.8649044492913981 0.4310010235593375 0.7548953620633390  
0.0733811481647794 0.9484647448564392 0.8298638366384723 0.8098674989591049 0.4408867154103261 0.5831939416766406  
0.4157947816219004 0.1265678261551827 0.6020434921534820 0.7059839012599083 0.4402086830065865 0.4698070371002985  
0.4109571548665812 0.9971223345336144 0.5893968541328211 0.6127653781562994 0.4354823464026739 0.6046949890731372  
0.3977974042782543 0.8676775990702340 0.5823361794445520 0.6117136894980708 0.4498237495146829 0.7933152194553243  
0.1881263010247056 0.1310891517546767 0.6244075360808716 0.7340935148872029 0.4404719324503657 0.7391727724037090  
0.1918057308884286 0.0022053104263562 0.5948145721021905 0.8771341809026052 0.6520252917902383 0.7352649183734530  
0.1994049543179358 0.8718421166320985 0.5893574750689082 0.7969357032678202 0.6429512065026316 0.5855313671129464  
0.9948391251902550 0.0491511912081064 0.7945859800556833 0.6909795122167045 0.6599629721742860 0.4501408738587503  
0.9958580435351175 0.8479179822460947 0.7886790263931166 0.5941485563905297 0.6588780416349037 0.5777943856804061  
0.1242039470733153 0.9414845069544909 0.2618691301598531 0.6204146924902940 0.6545375769519375 0.7673829622722473  
0.1910162413057687 0.9392173431441380 0.425884233679449 0.7506096177142629 0.6493128397749026 0.7678274257377996  
0.2991773658888073 0.9451233312006175 0.5319032900056236 0.8101010087463566 0.5432856903352763 0.7072965630220024  
0.4041389396639976 0.9356551941263720 0.4202390622757399 0.5743748463371972 0.5494433597734648 0.6784833326275387  
0.3804205059495021 0.9430812071301269 0.2296708274087072 0.9205917586224547 0.3733186299820796 0.9050539779193616  
0.2534407833651460 0.9493381166426083 0.2582264108506073 0.8991794210216254 0.5021686114905878 0.9078155530753148  
0.1252706350325701 0.1591119374741335 0.2685766763026171 0.9052941032864941 0.6326058323752974 0.9234059789633177  
0.1865452664061539 0.1548136074139521 0.4347341250191501 0.6890761367154679 0.3715154019217110 0.8915414167456970  
0.2987671597895502 0.1539868738679398 0.5307501668878414 0.7027847197337046 0.5006337734949392 0.9084310231393661  
0.4028213828211977 0.1633783780685432 0.4173011460081398 0.6871763375980912 0.6294393259409454 0.9300442395578532  
0.3917473302372306 0.1575892211299903 0.2235759448724947 0.4977775759141542 0.4448935331672972 0.6988919741677820  
0.2557881436651819 0.1517487524276268 0.2708808994053913 0.4978984481812335 0.6515192607509535 0.7069856653539456  
0.1828354853359756 0.0494599146991523 0.3227139658494563 0.6243754438525829 0.9464060223837439 0.2451829707687221  
0.4154716510191264 0.0489510479729828 0.3280751798074015 0.6900696373916081 0.9422568472641831 0.0806909583793805  
0.0855554424520899 0.8706203352593891 0.1104244200370208 0.7967576870479591 0.9363921944955029 0.9722757543216159

0.9047609553085187 0.9378480774626882 0.0768557181548837 0.0733281481621796 0.5499565627444069 0.8234635358076112  
0.8817447742392177 0.9430805433163754 0.2668697779371272 0.4183967811300750 0.3712731209693315 0.5980202217906184  
0.7536028703837718 0.9445201027787224 0.2485900635848982 0.4091195746345867 0.5010680310937193 0.5870139661522676  
0.6263497812727846 0.1556073221274863 0.2403863382653547 0.4019118365696201 0.6307693309768825 0.5781670539719591  
0.6921376561671795 0.1575625635039157 0.0769969580303669 0.1858352266861369 0.3720236048813684 0.6106955574191075  
0.8017398834102015 0.1553858154044946 0.9738402639013948 0.1912015513473264 0.5017287578715358 0.5996234142176724  
0.9076587887207266 0.1622723991899279 0.0815158472107797 0.1991805853534046 0.6314007689375493 0.5850421143321484  
0.8838905846158304 0.1524509768140933 0.2715078589710356 0.9913550313733708 0.4510651058579278 0.7929265835233553  
0.7564515631231906 0.1550847670806740 0.2434272449577851 0.9986067310220633 0.6538551165790564 0.7912538472565490  
0.6918194241962728 0.0503310222667345 0.1869897208785206 0.1260896615853531 0.5592864112063535 0.2594051300502077  
0.9248762935823684 0.0489459535475012 0.1719591979807062 0.1902227180949030 0.5600397349871852 0.4266485529582469  
0.5782789244639611 0.8746370796171122 0.3926703710758050 0.2990981619587462 0.5568831377211492 0.5306354118880099  
0.5887682592253898 0.0031731423343440 0.4130754250350057 0.4027598420496442 0.5623098377454636 0.4163911778453516  
0.6007323377314683 0.1318338180416526 0.4291959851215560 0.3819737897910848 0.5411914809273641 0.2284413573799813  
0.8099844399974084 0.8723863065642981 0.3854481986035174 0.2547539918107027 0.5504573794358724 0.2613101843695012  
0.8103581965627253 0.0017801548370996 0.4020914248479911 0.1246136647567559 0.3414881873473479 0.2646537020888776  
0.8032642618322599 0.1301546307916951 0.4212396417403382 0.1949976295942976 0.3402900523697281 0.4229088223172421  
0.0019110325403284 0.9456975779461170 0.2038209154426494 0.3008041393808267 0.3455124752717634 0.5315998374474030  
0.0047487407183399 0.1489201255978166 0.2062395035220968 0.4031325721791152 0.3309513762894492 0.4137418793816189  
0.8722817850787837 0.0625016294853321 0.7416473609056857 0.3808362283897403 0.3554632183969589 0.2257933079491822  
0.8058686004055228 0.0553300596654527 0.5788216508816170 0.2534160579915149 0.3551245999866326 0.2504278806538124  
0.7014477363258043 0.0546323072142188 0.4655504060534350 0.1826161305605356 0.4504822268560123 0.3227433053248379  
0.6006988269461149 0.0588197918131322 0.5869208808591563 0.4303314772320175 0.4466406977940051 0.3409656958576229  
0.6151302236849854 0.0565979188182194 0.7789478413081858 0.0758809780964019 0.6271272036007339 0.1110768687539256  
0.7425899147654025 0.0584711133893764 0.7472306938487587 0.0979331598330237 0.4984971692835586 0.0919288545518808  
0.8744471868371784 0.8423254891760369 0.7281559151759498 0.0984595080840489 0.3679385127259360 0.0784108753350614  
0.7963972718767423 0.8573209314513242 0.5757510545962492 0.3157049530967540 0.6296851880595140 0.1341051772081919  
0.6950847171354764 0.8430965620135051 0.4569452395346882 0.2967894823127588 0.5066881835450932 0.0881002841659307  
0.5961929222246851 0.8445626876810336 0.5805508433247800 0.3051588955597949 0.3768806836883479 0.0753660001412801  
0.6174201819342754 0.8411817726970903 0.7691593978547564 0.5015781309569803 0.5502471081635810 0.2893765587221961  
0.7467192848906283 0.8472182566695944 0.7561460534389942 0.5006950146964357 0.3425107112292134 0.2858369816138594  
0.8099332911906783 0.9528952536398259 0.7015049989267538 0.4235212463203384 0.7492115141158316 0.6453338225338718  
0.5745799654350718 0.9506963927433936 0.6859976359702457 0.1882585675559924 0.7508011767296255 0.6522795242438231  
0.9168080043923376 0.1270699458940288 0.8952249159199886 0.2928562833755419 0.7521089867027603 0.0503970255114741  
0.9010319919165868 0.9983844236721470 0.9057279690199732 0.1066986192644722 0.7479998496112870 0.0618386649068923  
0.8994654202417872 0.8679720676595764 0.9162039509280975 0.0783021118764015 0.2488402180862154 0.1469885693731746  
0.6893969533302595 0.1296174963665968 0.8885086366911854 0.3112845722775920 0.2576659400300869 0.1525298355966706  
0.6937978181044804 -0.0001912016232016 0.9065077092058321 0.2133574896625469 0.2504595750233765 0.5603110342175506  
0.6894707441426974 0.8695792838360986 0.9241894198732032 0.3863639107829536 0.2488994439831246 0.5597825329311938  
0.4973390207644241 0.0546196809794570 0.7041546223382971 0.5727292793591865 0.2464997445415377 0.3548204911780272  
0.4963110302287610 0.8485611139531999 0.7060764084494375 0.8123545494112595 0.2480669966632741 0.3479877771382302  
0.3731898700680081 0.4389127733357829 0.7505845628315791 0.7138909669474816 0.2503791442614225 0.9455338530039593  
0.3092254055336564 0.4504423331963940 0.9159729064375853 0.8893236963046740 0.2490733109094301 0.9394533438764945  
0.1988729591983567 0.4383706036000817 0.0150193204628484 0.9193569786278468 0.7498900786036952 0.8475499900309484  
0.0872449001829415 0.4388232079228697 0.9200026799235411 0.6880529413405733 0.7490364679318354 0.8564749146977724  
0.1141477101823766 0.4436630527195083 0.7299247758887943 0.7926568882415663 0.7541265357971717 0.4556226947209389  
0.2429838938756100 0.4393202935357605 0.7517161759727589 0.5990945323463621 0.7529327548193105 0.4446631612276711  
0.3767205659082166 0.6575379179775738 0.7650854082509743 0.8736465600106849 0.7250963196794765 0.2925701955367743  
0.3098576760896317 0.6372598171115256 0.9265523166207855 0.6968305890489569 0.7484874122579459 0.6339966857454703  
0.1937039716271901 0.6503082024637425 0.0425696904984169 0.7734959614313757 0.6715699241560464 0.4721512141519931  
0.0913584983629146 0.6591555692456068 0.9242569979888334 0.6227656213809574 0.4378275040936984 0.4662453163924610  
0.1202086191052190 0.6551026507475218 0.7347343267512808 0.2737459066508764 0.6716512901210682 0.0270943287444322  
0.2479713791606256 0.6611999247510617 0.7600981000487369 0.3048568662468526 0.1752491553208630 0.1758047821862739  
0.3086647179444349 0.5483883574188892 0.7839959684838169 0.4232879775612565 0.1742419983876173 0.1763698072549212

0.3462603630436811 0.6586824717620751 0.1668604617233239  
0.6568347946884591 0.4248623103531395 0.6277167229754947  
0.7510788623467891 0.7055280820182330 0.2513919026711837  
0.7553037627599429 0.7277071406133264 0.1261085452664845  
0.7677362271909325 0.7880743445838089 0.2182871689632997  
0.8574057892310057 0.6715520525647137 0.1691601006869240  
0.8759963809188157 0.7551317602200470 0.1477910565802036  
0.9340012421796499 0.7531760303655866 0.4562172750456864  
0.0143629694683350 0.7396186602021254 0.4117957089696123  
0.9591034068183969 0.6726786242304207 0.4234571369665794  
0.9497690699972320 0.7884843493506892 0.2791926847349268  
0.9679820733225212 0.7067076275505557 0.2466091532041714  
0.6683941746731785 0.7107937053515471 0.6245116266873725  
0.6668588993577116 0.7853950433643366 0.6321343732585033  
0.7762900269857815 0.7367575688657880 0.1983212052247019  
0.8482105575060070 0.7220059215897048 0.1961197087663679  
0.9634014272052704 0.7247343430630748 0.4044629028977536  
0.9414837003902401 0.7367381437804114 0.3010612815207488

0.8793890992111909 0.3238623868467451 0.9754412752313606  
0.9290705284211548 0.3672189741192137 0.1839189414189029  
0.8145167040719093 0.3259361332628776 0.3248367693848354  
0.9190199049196871 0.4400365144241407 0.8406383641998619  
0.8052079989263252 0.4649201872595692 0.6954834412044747  
0.7832309837843624 0.4341456664070210 0.4719942153013939  
0.5707617908661877 0.4719297021131556 0.6993678760440553  
0.6858280437416329 0.4409016543772446 0.8359315540578776  
0.9242844718546498 0.6718169635368464 0.8235648060001066  
0.8074453523013186 0.6232175484370969 0.6953712551592846  
0.6151532454781798 0.6743976311411515 0.4645799595609318  
0.5709925272420028 0.6293553093302469 0.6837777627988774  
0.6864169387823179 0.6711845173343000 0.8288694909415153  
0.5736310411633418 0.9436084677873005 0.3369125752527620  
0.6903605837333880 0.9705853099670357 0.1918147579441364  
0.7178947200846044 0.9371046308886841 0.9706741918116653  
0.8753338757621699 0.9349757980885407 0.9679879504456427  
0.9285162438586571 0.9688577175276757 0.1795476211604701  
0.8134419426890555 0.9402555757521363 0.3266771852942808  
0.5771938786081563 0.1692872822889286 0.3313503157911444  
0.6916863564288097 0.1291712262830687 0.1873753974633555  
0.7244182170623903 0.1729660085252468 0.9719641750690033  
0.8787820308583677 0.1729125719744013 0.9723784461420963  
0.9308551197839724 0.1269669736549411 0.1814686443797943  
0.8142381280695534 0.1708937732645346 0.3186739054636466  
0.9207029816127651 0.0576283631172079 0.8343848259664470  
0.8070883158323685 0.0300160988923833 0.6897709324603803  
0.7797462928625611 0.0604985275588358 0.4668270749151713  
0.6230207529934075 0.0611416561311436 0.4742380960566345  
0.5717680575949894 0.0297569474371225 0.6889455698907717  
0.6862669726010375 0.0596282005840377 0.8303634165303105  
0.9222488141269188 0.8268839985377209 0.8191924164474527  
0.8065921464116823 0.8714437716688254 0.6868383655695320  
0.7738661667273022 0.8260204691165040 0.4670105300585808  
0.6185578551964791 0.8271487217627311 0.4675557804496270  
0.5712196714866091 0.8713139622643068 0.6852632090946769  
0.6864955475722534 0.8255160534558733 0.8246281758076102  
0.4230589868780691 0.4391510462792599 0.6585428313956883  
0.3079671607242956 0.4696124728671734 0.8010788072962794  
0.2772010464284556 0.4417868106998133 0.0233239473381077  
0.1206814145271543 0.4359461768602499 0.0270175680524398  
0.0664571929379721 0.4709613633519554 0.8164005249374808  
0.1833968745296121 0.4395555732037593 0.6734444530822046  
0.4243174290226743 0.6720132101189188 0.6745094028556405  
0.3102387117130829 0.6261285331300106 0.8121478778544134  
0.1183933255151057 0.6707645361470451 0.0340340174417952  
0.0705761911031356 0.6293382005315240 0.8193052951275992  
0.1889588502367998 0.6740107105560981 0.6852537103895220  
0.0767855767971442 0.5566323534771085 0.1668486604176412  
0.1870547632064022 0.5290760918371207 0.3185617797982549  
0.2203721753711410 0.5621276003614571 0.5367931007236079  
0.3776651134612800 0.5625100388604831 0.5293462208695079  
0.4297008498797923 0.5241772139817414 0.3204417430321966  
0.3111139296662770 0.5514705205163156 0.1811389000594050

## TS between DEE and ETY on LAS + H2O (T2)

0.4236787812258979 0.0584105470166786 0.6630539296718577  
0.3092228303407308 0.0270634904729373 0.8075767455267707  
0.2792106678278390 0.0591257958843471 0.0290246917384261  
0.1225802908725827 0.0609915463259344 0.0308682396488431  
0.0688247065500431 0.0274842947154238 0.8204427154898706  
0.1851509239101740 0.0594718202230254 0.6773930196133274  
0.4235980969808337 0.8259372732871048 0.6761176195725926  
0.3105147423687693 0.8695335669887240 0.8163300999149073  
0.2752735850065720 0.8273079907743743 0.0322646668984895  
0.1198723170840844 0.8232373749289909 0.0297314561115765  
0.0689302177161419 0.8693755862383787 0.8202362169298814  
0.1884194493163555 0.8269355215296906 0.6866126932859924  
0.0772002305388460 0.9398795229770704 0.1674403085609280  
0.1878967609894485 0.9704653124744078 0.3174497191104829  
0.2204457512110893 0.9394643161190136 0.5363855727225261  
0.3773713961162626 0.9364305849631976 0.5320053961107412  
0.4250500422337326 0.9691651671530093 0.3176589461257783  
0.3095713010049009 0.9410257817518819 0.1762186157661916  
0.0779676064958285 0.1712893256723711 0.1767495697682391  
0.1890176848544141 0.1288564793260963 0.3230813737576361  
0.2214137247916791 0.1725888800663397 0.5373332477342098  
0.3749878365823071 0.1726952418263442 0.5290035723660018  
0.4303482573237874 0.1257520389936537 0.3232115651560371  
0.5727142764665921 0.5601000123658688 0.3406095525656325  
0.6896951815155021 0.5258639223539425 0.1982364011266900  
0.7199790827054576 0.5635943515211750 0.9771141563404143  
0.8772727487901747 0.5655755219161145 0.9723338266248099  
0.9296407258115802 0.5237938844271092 0.1804978077368006  
0.8164412057223355 0.5525016942970684 0.3296197206492263  
0.5730174897160646 0.3239428549323304 0.3285948285778688  
0.6903040646479007 0.3674465823800945 0.1936684210170473  
0.7255438377583494 0.3266156223807436 0.9743645993385822

0.0762415720981965 0.3260017068572668 0.1743095659257989 0.8844232648435806 0.5488069941440396 0.2688819520763560  
0.1892351067888436 0.3713315698997428 0.3152661561858000 0.7568372384287572 0.5462617385658909 0.2515677740865036  
0.2234943859324595 0.3265624355220277 0.5314563501329761 0.6256403969708713 0.3344706215431017 0.2403190322940582  
0.3767736585385799 0.3242413121736922 0.5251562547480023 0.6958109426270266 0.3430942826689273 0.0810175549232235  
0.4288901580236132 0.3682540506509959 0.3165329413006823 0.8027464474812908 0.3436814609898580 0.9718970191187383  
0.3117340665124694 0.3343306727942493 0.1765294945660136 0.9053125016277765 0.3288316104803496 0.0866129057882560  
0.3731217441981461 0.0576559136066642 0.7539111273771465 0.8836078932961731 0.3458141496906622 0.2751042379903582  
0.3101219266315576 0.0494909556231267 0.9203656119210140 0.7552389925577316 0.3449120078519832 0.2516433487659688  
0.2003439857930830 0.0523908507476583 0.0218867893566593 0.6832228847793165 0.4464528579440441 0.1971118151369204  
0.0903045473444613 0.0605811760771175 0.9231370206508051 0.9230964821352863 0.4453483752468617 0.1642210980008553  
0.1156435829276798 0.0527680207056755 0.7326615222560687 0.5696826039215922 0.6330702228632806 0.3891107697114360  
0.2437108693707981 0.0541136247256684 0.7559520750160764 0.5849737392819193 0.5060772376530203 0.4239591932816714  
0.3762303093704438 0.8379094420520342 0.7695464231964035 0.5902304842669077 0.3653288031705675 0.4242050214568220  
0.3091314072622687 0.8544304325643739 0.9319961155650545 0.8144655301480894 0.6209200244755102 0.3871250854792965  
0.1969219348968033 0.8391862929011048 0.0226471951228805 0.8162391115698117 0.4914405788276877 0.4058173891332393  
0.0868579187313988 0.8358431921415157 0.9238874913855201 0.8073636855857386 0.3634675884750265 0.4287272276637742  
0.1188180866297716 0.8448926395312437 0.7358771920199733 0.0040267363432346 0.5427516640669107 0.2078975014820703  
0.2463842957847989 0.8384841641396931 0.7649963610151644 0.0036517513010543 0.3477935961287030 0.2082508923750727  
0.3115819150409641 0.9479048488986119 0.7965119469122701 0.8646184361160284 0.4316278654437422 0.7556802354451200  
0.0733796930734723 0.9483808154313250 0.8303926237918713 0.8097352072289060 0.4399902719909339 0.5839024638284046  
0.4158290296040573 0.1265588527675371 0.6024957762268411 0.7058495835328664 0.4392616502941219 0.4707075648343147  
0.4109816523567888 0.9971443424055091 0.5895908619312292 0.6129367828384660 0.4359773979214890 0.6057128790225506  
0.3981911808706121 0.8676977102653081 0.5824713252660140 0.6114880792654918 0.4492863648426726 0.7944010513566514  
0.1880427882098228 0.1309707860414860 0.6252405399251929 0.7338615135660074 0.4405961789672497 0.7397472954846109  
0.1917610679705709 0.0020095739543583 0.5956923192042068 0.8764547471238650 0.6519141369119529 0.7351370811303569  
0.1993712065747120 0.8716211175973033 0.5897675488640004 0.7961906543897733 0.6441513175927013 0.5853708962248799  
0.9947149100387757 0.0490885800046160 0.7953222530314448 0.6896703526964487 0.6568942580781738 0.4510758517139908  
0.9958439892853171 0.8479567688278973 0.7887771092669604 0.5929402215166166 0.6586759411424625 0.5790428544614699  
0.1240687184792694 0.9411147431133557 0.2626818934341991 0.6197820108125757 0.6547263325375714 0.7687792049896711  
0.1912006625610239 0.9391602289062787 0.4265690302615219 0.7498256470327692 0.6484533320242538 0.7682564763670515  
0.2992403513662098 0.9449737564635733 0.5327436144158552 0.8094863442537649 0.5433687292811984 0.7063183556103698  
0.4039333725706132 0.9359245278591606 0.4203826601481260 0.5737665589661144 0.5493434451674908 0.6806852875024050  
0.3802484222358329 0.9425547389226971 0.2297135362027249 0.9200914052301638 0.3732019559825067 0.9053458490770226  
0.2532368717418490 0.9494925061754552 0.2586562668900705 0.8993366579845896 0.5020635500534633 0.9092191838659173  
0.1254889420161790 0.1594220755959302 0.2689126652227602 0.9044764400930569 0.6326387202987698 0.9232632056996717  
0.1863539896015166 0.1548404063175527 0.4354355754429927 0.6895152286348009 0.3712005830858560 0.8921175560834482  
0.2985908472131885 0.153523353233073 0.5312784979615308 0.7023937587303040 0.5004427295892433 0.9090418397749581  
0.4024211934954367 0.1627465547546594 0.4175320702072624 0.6868315286811973 0.6292445337787208 0.9312307375265683  
0.3914665815161461 0.1583097363973214 0.2238562776822685 0.4977951776094431 0.4441735622097820 0.6991508602773799  
0.2559407793964046 0.1508245448675472 0.2720907225567215 0.4972157347732149 0.6513858394692320 0.7085462125392377  
0.1821363520599920 0.0493181722132268 0.3233985048863011 0.6245766861511728 0.9458130804302191 0.2462935794060202  
0.4152154706873195 0.0487775074039814 0.3265245105517682 0.6900346242158093 0.9420130885731559 0.0814612948001062  
0.0860269291497902 0.8705067427558778 0.1107864909330507 0.7967431858878909 0.9369782419698088 0.9727544476098205  
0.0930202913516466 0.0006870427289100 0.0947597256113776 0.9045551707456531 0.9356954150274051 0.0777687176613628  
0.1038760927826693 0.1303246823867032 0.0822429937988353 0.8820607968503711 0.9433987079518863 0.2676512391440103  
0.3025259673184025 0.8704429309491183 0.1233976368096414 0.7539427430446911 0.9438086317839335 0.2487839250911994  
0.3062952769004177 0.9995465003810718 0.0969680843394189 0.6261737427306315 0.1554362992254793 0.2409039040092455  
0.3007418329660994 0.1284876425984224 0.0729577932074828 0.6904503129272612 0.1555295213828884 0.0759903982217134  
0.5006544321741665 0.9529345157219887 0.2937569713521312 0.8014905207146048 0.1558769749359800 0.9769687678947074  
0.5053386688733286 0.1419488380890166 0.2983420242295970 0.9094531363328381 0.1613305462665545 0.0797287572118293  
0.6270566219037268 0.5572350606650472 0.2531307576838669 0.8835075759950791 0.1509741350278747 0.2696912729436817  
0.6912803786382941 0.5531474599437674 0.0863182093583995 0.7561149388937354 0.1562558925756416 0.2414545837714597  
0.7986741392003819 0.5700259941733367 0.9810366770093694 0.6920182542502826 0.0499641437250323 0.1894565435507481  
0.9082853261831123 0.5609458676572984 0.0806438018659670 0.9251382254851064 0.0479806633769017 0.1697481721911656

0.5779203349121196 0.8737426708922919 0.3931231120827145 0.2991325373143108 0.5561892733091626 0.5317389812178316  
0.5881604680255238 0.0023891402373749 0.4141499201185753 0.4024663626996791 0.5621028711299473 0.4166587725919496  
0.6000150611186186 0.1311461718382425 0.4292680271598051 0.3816332292831834 0.5414831754248527 0.2287555945810755  
0.8108508311537823 0.8717067789090425 0.3853717295907891 0.2543659416119054 0.5489099580481305 0.2617379278983852  
0.8102466788916293 0.0011013130802281 0.4029887286445465 0.1254345661345814 0.3405112268802621 0.2640161222235914  
0.8025574129845717 0.1296795645561375 0.4188491946437660 0.1948213989065198 0.3393969001721714 0.4230400772193829  
0.0019813119881525 0.9450297870206351 0.2040654971565408 0.3006492790887085 0.3453800319498915 0.5315322719142836  
0.0049120637013023 0.1477399796861354 0.2070040839497567 0.4029608393417335 0.3302387062707835 0.4136963323868686  
0.8722292449006879 0.0584295098966778 0.7411884040652185 0.3813165944361991 0.3539030182909885 0.2253580049827924  
0.8052818704935344 0.0569251591331730 0.5783487568080903 0.2540310023562338 0.3570607974967086 0.2514645776324111  
0.7010211596553590 0.0541972216794039 0.4647991114127071 0.1807587201716102 0.4502798424617732 0.3248707340381707  
0.6007372313517688 0.0587812787579368 0.5873356721126979 0.4287817294453901 0.4461654930600726 0.3409690593773951  
0.6152463136194023 0.0563305654042172 0.7791519308049546 0.0758342532988085 0.6269270878063524 0.1114212518105402  
0.7426978408634138 0.0556624231844029 0.7474009834531037 0.0984688399332899 0.4983380996477278 0.0927387934314293  
0.8750080155222394 0.8422056719998605 0.7271160512295824 0.0985968855730792 0.3676887926353672 0.0784292570705919  
0.7968905857449138 0.8507875897919992 0.5745151015928225 0.3144372347383812 0.6297374777575121 0.1354044448560821  
0.6958796719791546 0.8410451274374711 0.4545333150608401 0.2968781378836065 0.5066599769108288 0.0877992832534576  
0.5976871558095108 0.8443770263389858 0.5804500593513862 0.3053087402154209 0.3768350806983090 0.0757144576012657  
0.6181310260214792 0.8412401627043125 0.7691635819922670 0.5013587179440563 0.5490102272629156 0.2895541036113625  
0.7474959711920326 0.8463840541165986 0.7561448441232227 0.5009314311912032 0.3428048709941334 0.2866472324527696  
0.8087160986573475 0.9509056678298330 0.6926636050508098 0.4230387434613543 0.7491265563898858 0.6455665500703682  
0.5746155326200060 0.9504464578732933 0.6857980314616987 0.1883947304086623 0.7506317906527435 0.6531330584391462  
0.9144409630956799 0.1266706419963962 0.8926083363619103 0.2925784198927194 0.7517607736564526 0.0511622403045275  
0.9020284027102448 0.9980116733361292 0.9080858753745902 0.1065146728407175 0.7478062996556823 0.0622300758367287  
0.8985653945581937 0.8676014156262770 0.9154309409888471 0.0775681656451443 0.2485780345006227 0.1473175634267941  
0.6909151933275538 0.1295261871891116 0.8868602292987342 0.3089225189762466 0.2577648535750935 0.1533645531169804  
0.6931023569280027 0.9998038251016159 0.9078849108824582 0.2133483117730109 0.2502523819742948 0.5612626641793829  
0.6902012115991301 0.8693570116301127 0.9241843776610926 0.3860227640357698 0.2486078694925246 0.5599102176659522  
0.4974133058819317 0.0543704705398375 0.7044827408955365 0.5721074616183527 0.2460517823669159 0.3557478947723680  
0.4971088402031964 0.8477783731959739 0.7051345639079738 0.8135672953858142 0.2478462529054296 0.3463744706936563  
0.3730160946204761 0.4385965445442269 0.7503150236972459 0.7130908663633864 0.2500872222647693 0.9474155677155182  
0.3092929847895807 0.4499011723983303 0.9158807854303971 0.8894383005607700 0.2487038986550560 0.9390938752344831  
0.1989698570669990 0.4381377831082272 0.0150816383837523 0.9193488960573735 0.7496944540622762 0.8471260413371161  
0.0872318041358362 0.4390090517524750 0.9204201364767775 0.6881731789879291 0.7487669677878872 0.8569454847302834  
0.1138533624899565 0.4434543165024599 0.7301005956475636 0.7950157073504246 0.7517124886448232 0.4466220771269391  
0.2427570535337432 0.4392328828093810 0.7518150539686157 0.5985362459683757 0.7519906389039791 0.4452353121660179  
0.3759860967964938 0.6576061039293511 0.7650914097528781 0.8632154299689522 0.7150914313357205 0.2693419233339234  
0.3101557113827217 0.6367824581063396 0.9273344659164150 0.6978889071281107 0.7475672665059765 0.6317099866920036  
0.1932731089963014 0.6502485433739312 0.0412974883301484 0.7717647452674362 0.6708738919468494 0.4709355864175540  
0.0904127908669005 0.6591671048402534 0.9243386036350802 0.6226960759213684 0.4372978301245635 0.4672365710385994  
0.1197204137148072 0.6551564755560463 0.7348174779302055 0.2735104751983623 0.6713042286909028 0.0272466762424852  
0.2471934746557236 0.6608630077641929 0.7620249180649786 0.3044499865595228 0.1753672488568832 0.1768387267185161  
0.3085036446254089 0.5481555496265481 0.7844509084400874 0.4230700248176764 0.1751000691310039 0.1771374023276917  
0.0732387340135670 0.5499147811417545 0.8233173904607368 0.3437760056123240 0.6589281374731953 0.1692935871916489  
0.4182413882013713 0.3710959352827144 0.5978104371742061 0.6574010847257296 0.4257850455066788 0.6285913447884628  
0.4095330797284154 0.5009900195223658 0.5872953062227875 0.7269290251668035 0.6992871040175438 0.2454573295184828  
0.4018188464072775 0.6306103522570300 0.5785275022194478 0.7295465237279800 0.7277931311399370 0.1239892581295805  
0.1856720370265963 0.3719409008326044 0.6106898116031668 0.7418835476714898 0.7834659093073953 0.2200755339482874  
0.1909035168181773 0.5015829629653394 0.5996785681546475 0.8314551511510796 0.6711218591822220 0.1502577457151092  
0.1995174246911804 0.6312022272569130 0.5861446979111720 0.8475757491626366 0.7543514415383024 0.1343808002434635  
0.9911217903051985 0.4509848687917405 0.7937220877446525 0.8871537320075830 0.7341440941888420 0.3805732234926361  
0.9979757829503281 0.6533419243284690 0.7909094900302029 0.9724996445502441 0.7605710817306430 0.4434313701130296  
0.1258619115240047 0.5594553999121017 0.2599516508628729 0.9621369067860479 0.6763493905758219 0.4137780641028558  
0.1904240008155255 0.5604205352174190 0.4270658737066463 0.9556715586593511 0.7914366891027935 0.2747667374069802



0.9711128846958021 0.7069954708662597 0.2368102352405215  
0.6703903839222851 0.7088183344585494 0.6245482570553136  
0.6665711572311996 0.7835235604783590 0.6303046103648641  
0.7522212786521498 0.7331248935438924 0.1962388365353236  
0.8248579034168234 0.7198236991857340 0.1865969043262205  
0.9497909810797754 0.7261390862087246 0.3927729988136002  
0.9547077892526871 0.7400515106990720 0.2921243813538006

0.6878186828067001 0.6726040227868424 0.8242671613596926  
0.5744524088302185 0.9444852311989820 0.3353822670451336  
0.6913127181326573 0.9714679298148070 0.1900662970049041  
0.7184931840553475 0.9373421175706724 0.9695053034827197  
0.8757967171000374 0.9353359603622948 0.9665818080559490  
0.9294307473507502 0.9703570665591101 0.1783246086935506  
0.8143931315323982 0.9413952218944743 0.3248822264709901  
0.5778761352685393 0.1698885569374653 0.3282901930778337  
0.6924826152113468 0.1300293814073754 0.1849456801913121  
0.7250067067258215 0.1733246272277498 0.9688328856347610  
0.8790883391586775 0.1729518512849779 0.9705997739280861  
0.9306759468126771 0.1286066444477072 0.1805957693430642  
0.8142631382410670 0.1724272990994535 0.3179107183394265  
0.9212357059128919 0.0582371691240979 0.8325811357882742  
0.8078775065806738 0.0322529013371380 0.6887550180883295  
0.7804643560472471 0.0615861363946451 0.4652118439255588  
0.6237369693054404 0.0620781708961005 0.4724351437533585  
0.5724397787563760 0.0298480427295900 0.6863751205445752  
0.6866261266683864 0.0599683643563935 0.8287635144021763  
0.9228514704747184 0.8273301447837511 0.8189582796176325  
0.8076691531395994 0.8737984047044520 0.6870144501014579  
0.7734560481582591 0.8295027154284043 0.4670833179282212  
0.6191861608230838 0.8283856170584727 0.4652875470886926  
0.5709627606521082 0.8715203916413117 0.6824565069294835  
0.6867518195252913 0.8270015402422004 0.8225990552323239  
0.4231097013188858 0.4397504431248080 0.6569202834951966  
0.3082221427542180 0.4696208862062434 0.8003073790019144  
0.2771822582191632 0.4420674708182588 0.0218752648695002  
0.1208267488830330 0.4361581756505188 0.0250523509365621  
0.0664444043194976 0.4714318115403273 0.8150044104588190  
0.1837901563629103 0.4399492786380037 0.6726593627535067  
0.4249903529997141 0.6721998689002078 0.6728821336306368  
0.3107825530791075 0.6262708513123769 0.8105827643631187  
0.1193167078691388 0.6712984945408422 0.0332596888402108  
0.0717017745691280 0.6297541870686985 0.8183745152341899  
0.1896416962440242 0.6742405938689302 0.6833900373747142  
0.0769836761516416 0.5566372554578507 0.1652906104629821  
0.1876086539819610 0.5293912520406181 0.3168774115415474  
0.2207432532122198 0.5625006772345102 0.5352805333899937  
0.3780447498649124 0.5631092201197063 0.5273300150191744  
0.4299479521001572 0.5243283276574360 0.3185908827122148  
0.3112967942136891 0.5520993343584664 0.1791947403441938  
0.0769451933417500 0.3263951633578728 0.1729061186679814  
0.1896755946101223 0.3713374632882491 0.3145897126648833  
0.2237355562521088 0.3268650976547747 0.5309567523096490  
0.3770875370891389 0.3245509678672462 0.5243035729376473  
0.4289685169076094 0.3684541218501280 0.3153326053135856  
0.3118885186622151 0.3342421909811009 0.1754974150641644  
0.3737954382334010 0.0573445173866389 0.7517474149719092  
0.3112042852034307 0.0489430024337167 0.9184585665364793  
0.2006665982539459 0.0536494967252281 0.0173945313288115  
0.0894427631466854 0.0608724317201776 0.9220674166484741  
0.1163304288676841 0.0530346980585037 0.7320070683414599  
0.2444711751984983 0.0548940263095332 0.7541449733060546

## ETY on LAS + H2O (T2)

0.4243391296873895 0.0582133319223530 0.6609632779500174  
0.3097357046404241 0.0271493253806767 0.8055281878767389  
0.2794476803028090 0.0593715702676505 0.0265308550192458  
0.1230223645972899 0.0614871436864490 0.0289934801702998  
0.0690652712446820 0.0275258409665682 0.8190876846211097  
0.1855768344149595 0.0596472428940942 0.6760479659716978  
0.4236835662758835 0.8262247610400166 0.6749652179662888  
0.3105237119140654 0.8697945110024534 0.8149692462365223  
0.2765118292908681 0.8281717567813374 0.0316762247523386  
0.1208104211602574 0.8237735022264516 0.0292257919366605  
0.0697212497753839 0.8694100668780962 0.8192393496337331  
0.1887151773834219 0.8271150409101935 0.6853464271884917  
0.0780108765016791 0.9404767174747661 0.1661580527315536  
0.1889422418557629 0.9706905625702831 0.3161191288832157  
0.2207413733122934 0.9395871294153579 0.5349961340811618  
0.3776453968758915 0.9363933796245050 0.5301634415095648  
0.4257136383203388 0.9700114429351885 0.3166711713471884  
0.3104434812818226 0.9417560383883270 0.1750019262541400  
0.0784704754086789 0.1716982405058758 0.1755205383480316  
0.1894353030112867 0.1292143295988595 0.3214425445957758  
0.2220102803740360 0.1728734309358515 0.5362409191549986  
0.3756204936753988 0.1731002231834182 0.5281062313927620  
0.4306023277815996 0.1266450788519151 0.3221600775776707  
0.5732128280164730 0.5605044462529918 0.3364109957193691  
0.6900935749960553 0.5267359981124642 0.1927356970536209  
0.7205846668942542 0.5649116888910157 0.9728336845831862  
0.8775921894678049 0.5656816746295661 0.9696698179317664  
0.9296796167073182 0.5242186884750311 0.1778482830601433  
0.8160176310032199 0.5549628535435147 0.3256773225011216  
0.5731846812662553 0.3248507435997823 0.3252723809157771  
0.6906260810815397 0.3680560876680872 0.1890858746693169  
0.7261457373001790 0.3267000454973541 0.9706402447934863  
0.8797294572253094 0.3240141859775818 0.9715618883914487  
0.9295514748346463 0.3674463902670269 0.1802020806529967  
0.8144563826544768 0.3270755871825841 0.3215410750600398  
0.9190824249038627 0.4402205679581996 0.8375177366683602  
0.8052418890654138 0.4658029704562381 0.6924490026296439  
0.7828450198205701 0.4363861408192662 0.4685585375897716  
0.5709953501998655 0.4727266637321321 0.6968175015954543  
0.6860833699077986 0.4415175927675747 0.8333949016959252  
0.9256806824288120 0.6722454887492120 0.8215522721848956  
0.8093220727135275 0.6241717320068361 0.6923827500832687  
0.6158039192855185 0.6748239524014394 0.4614649204150751  
0.5713493208008416 0.6300246740245541 0.6801231271305923

0.3760108491438814 0.8376945299922198 0.7680993036847070 0.5893946964556065 0.3664298355149356 0.4211258519456962  
0.3095350214571155 0.8555515087265704 0.9308775723782787 0.8131288390491562 0.6256359017702309 0.3777185199103883  
0.1980828259629774 0.8393927640179797 0.0235994407927649 0.8142625898220075 0.4959774018676200 0.4054479531982764  
0.0888294940074914 0.8361283239040560 0.9225446286405372 0.8083525436165715 0.3667964338358090 0.4237413062044197  
0.1190773697262344 0.8449695224344680 0.7341937257712701 0.0040591310032241 0.5428663117943771 0.2053212023291948  
0.2463780377300964 0.8382364172582868 0.7644539947907063 0.0038806855699036 0.3475777015520620 0.2055409899885277  
0.3113238358911445 0.9479566678916456 0.7937013373216928 0.8649987588931438 0.4326614119856487 0.7518053685922439  
0.0739225753172690 0.9484327404603619 0.8289714232719589 0.8092156612828916 0.4413868366264140 0.5806328096353823  
0.4168148071425222 0.1265192979385787 0.6005137802147047 0.7052737115970942 0.4395691819883112 0.4673606186587804  
0.4117158303844519 0.9971002447960089 0.5872111114925644 0.6124020202169049 0.4361205662632912 0.6028867076233553  
0.3984680766763375 0.8676630167009733 0.5809393128472635 0.6117187460279254 0.4499075447484486 0.7916647710586489  
0.1881629219037322 0.1310346256237267 0.6234249094777695 0.7340269022507258 0.4415882423355910 0.7370095829240313  
0.1920324200294772 0.0020387354964058 0.5945728753302433 0.8790027453078508 0.6517235846849019 0.7312978356532938  
0.1999887188256508 0.8717212708654429 0.5886196076544934 0.8002688547207839 0.6447729459716243 0.5812750273616203  
0.9949614321362574 0.0485482730468831 0.7928943588987565 0.6907093987023387 0.6542500828985425 0.4551772628146296  
0.9966627565356418 0.8474114558578165 0.7886611345252703 0.5907319426045419 0.6596522482590785 0.5740832117560899  
0.1253270994919475 0.9416130276155101 0.2608706232133571 0.6218457417469097 0.6564480970060842 0.7619172666762140  
0.1914559613032338 0.9393622350088080 0.4253223121902892 0.7518411394670608 0.6509904295651481 0.7637333985413477  
0.2995924927521827 0.9451178248019261 0.5315457034065147 0.8096063056123413 0.5444497425733630 0.7031865939287982  
0.4038224959978294 0.9356027942280747 0.4182595258378115 0.5750148207928021 0.5501375454374866 0.6772188954511265  
0.3815512130120311 0.9447535307864072 0.2272513717804756 0.9203426702641337 0.3724699249502805 0.8999810590533670  
0.2547024869990722 0.9493938474686843 0.2584705057212844 0.8989095967055718 0.5013361420261830 0.9073962881203244  
0.1249925216981254 0.1589338862809910 0.2686543503990748 0.9061713094624579 0.6317217129261579 0.9195552726531986  
0.1876372145737832 0.1554864870818591 0.4337407007650214 0.6896854367479435 0.3717205292039978 0.8892503278580719  
0.2992653010086883 0.1539011374298767 0.5313022900793953 0.7027227406001870 0.5009161263403854 0.9065845154129022  
0.4025255259848706 0.1638993239566915 0.4162297776714894 0.6869807637697676 0.6296671476612659 0.9251150092861167  
0.3914797169186883 0.1580734426270638 0.2223952592197094 0.4977128391815455 0.4458194766215300 0.6976230352048134  
0.2555956312951722 0.1519178538562898 0.2689193967396335 0.4979647450245110 0.6517482280116411 0.7075170302015934  
0.1838608834899063 0.0496325138316180 0.3223260435344244 0.6251385634425048 0.9478275783368062 0.2446990642611766  
0.4162948065189198 0.0495530393312293 0.3275326770399545 0.6904512968641257 0.9425142834780971 0.0799872035817799  
0.0864848155156679 0.8711175500315704 0.1093658280323169 0.7971693064504066 0.9357785974393735 0.9718812819264286  
0.0947594513597210 0.0009536038557769 0.0933328962189819 0.9058986857192224 0.9387218613259023 0.0754090171610287  
0.1043582814379533 0.1305956316239403 0.0812470852039908 0.8826979467042264 0.9445140546941602 0.2657692133022920  
0.3044094289160100 0.8708233282244393 0.1227278885220571 0.7544550812866646 0.9447757302780744 0.2478850746719701  
0.3052456817660314 0.9996573521981205 0.0952650190922952 0.6258727527980170 0.1549794644929179 0.2370183759550102  
0.3016485623040239 0.1285440774292113 0.0703259418023592 0.6920432478441114 0.1574948060477297 0.0741268562937947  
0.5013185163873857 0.9537595303171500 0.2931181101737366 0.8018928471536881 0.1550699501015131 0.9720833070802328  
0.5053474084670739 0.1436074681587698 0.2968775612890937 0.9079778725664625 0.1627352849552111 0.0792505339301073  
0.6265704450539289 0.5556987675667315 0.2481065248534975 0.8836670635726946 0.1532766142676394 0.2688782488798864  
0.6917048060090210 0.5557384884403120 0.0820942840569217 0.7559712744887079 0.1575954509127158 0.2410168647039725  
0.7990781830147498 0.5711579210460300 0.9757172008117294 0.6940837216202596 0.0508409769767582 0.1858460412480056  
0.9078650370164993 0.5608321000058751 0.0781299759825913 0.9253966011881545 0.0496495396344940 0.1700071619037686  
0.8843628736410309 0.5485191125911868 0.2669143756163166 0.5786749679955392 0.8740201966300489 0.3899796599181897  
0.7563503837225127 0.5473485554130662 0.2484121696522550 0.5890521881354474 0.0025181723745504 0.4138050213777689  
0.6249489450881782 0.3378614241386870 0.2366480814363712 0.6006565720925678 0.1316961319963710 0.4262195215587283  
0.6958625340715727 0.3414847578246238 0.0775821652988711 0.8116711288848393 0.8733520178048195 0.3852398980098997  
0.8031876891006320 0.3446065810918597 0.9686976847408104 0.8110428200633777 0.0024335021271753 0.4010652752108257  
0.9063849945479134 0.3296322016968176 0.0822097183116384 0.8030739389350074 0.1310755674511199 0.4180507806642808  
0.8833391150166250 0.3456258052636585 0.2703020842364197 0.0030232810807718 0.9471881262449671 0.2026168863252238  
0.7547233454751563 0.3452867042614969 0.2488013338704675 0.0047901271337452 0.1498496693598668 0.2045682916153666  
0.6857785406005874 0.4472902318672283 0.1883845310864061 0.8726972008491245 0.0620196116028424 0.7394636112756174  
0.9235493816618785 0.4456472858646521 0.1614665894816270 0.8058526891669757 0.0578514869863369 0.5767808191343633  
0.5728287136974686 0.6343994676660785 0.3825826276247497 0.7017207534376340 0.0553923041066824 0.4631890791308351  
0.5852341905387703 0.5075973265075859 0.4213688065096974 0.6014339552555228 0.0602282829770715 0.5856589262882039

0.6156895812823251 0.0550814441867828 0.7775985217750261 0.1947110984742793 0.3401480340156766 0.4229131681096945  
0.7430321351711910 0.0576142902051728 0.7455279019789103 0.3009538940641292 0.3456234387740480 0.5311521627980298  
0.8755899239633607 0.8435466470823414 0.7270283684201928 0.4030239814072445 0.3308383857139319 0.4127958051087361  
0.7979269115056127 0.8537010373452532 0.5742201367777824 0.3810557788520583 0.3549271006424277 0.2244514386826211  
0.6958107343362840 0.8460848929657914 0.4560371912153158 0.2541031747819034 0.3550251600934544 0.2514171204490907  
0.5955253203388082 0.8431054022649676 0.5774389646635214 0.1833748471586887 0.4505144321808956 0.3229671099028977  
0.6186605320339140 0.8414691484137009 0.7654174307669379 0.4300816200878756 0.4464329021240019 0.3398616706692010  
0.7478373350155394 0.8486418416415944 0.7547473911564140 0.0773080741293768 0.6268970926494433 0.1100980658977662  
0.8104932406693948 0.9530879101985477 0.6938066030185723 0.0986419242403684 0.4983196713690745 0.0910900597295026  
0.5753829237860941 0.9504992723548185 0.6811161497727056 0.0996375086978745 0.3678375963964058 0.0769365809232454  
0.9168914678874245 0.1264068502907918 0.8935095636953676 0.3160385792326892 0.6299851277418327 0.1329085306813553  
0.9006076087919439 0.9977777552292437 0.9033886883015469 0.2964214349393899 0.5072388687959794 0.0860913670458245  
0.8999111060012055 0.8677098822399785 0.9155678569764589 0.3047775055847026 0.3774611478746763 0.0754754671983946  
0.6895961349586059 0.1298342665352408 0.8855260219766379 0.5012710825944069 0.5501957916641516 0.2873233771167065  
0.6950707792030428 0.0004102012830955 0.9062629294520406 0.5004265475143512 0.3419653236725253 0.2844879421156108  
0.6892101751947024 0.8703732125409047 0.9223177921942778 0.4236797682910307 0.7493335134663326 0.6444175306843434  
0.4980280255726157 0.0540277629681682 0.7024786808077508 0.1886496115212779 0.7508057293948411 0.6517492932426876  
0.4969976527582247 0.8485071808968954 0.7046931657376092 0.2942185698035829 0.7524816494289865 0.0494422674017798  
0.3730636832284588 0.4389312333237569 0.7486097509314860 0.1075910443503858 0.7482046223316985 0.0612340631945330  
0.3102219553359546 0.4496227302604083 0.9149690187724673 0.0795057729788056 0.2490342765352906 0.1463235991209046  
0.1990681917368846 0.4388934340233632 0.0115852833377517 0.3101497243393752 0.2579440389969321 0.1508184921115472  
0.0867543177681753 0.4389558138361593 0.9188185046038839 0.2138046237579800 0.2505016599950665 0.5604332075095826  
0.1140734192188262 0.4445373516218680 0.7286067946741355 0.3867578074909233 0.2490266331333189 0.5592848106907766  
0.2428463534934977 0.4393903370416794 0.7515328934508432 0.5746756747942214 0.2469110856775742 0.3516906061296723  
0.3767039161301113 0.6569566306673593 0.7630867580489635 0.8129534588780913 0.2494059788839067 0.3461449176159093  
0.3108650927857113 0.6378288534039385 0.9256094705385323 0.7145232236300672 0.2502993469322234 0.9423599176658755  
0.1945017081245410 0.6511530312015097 0.0404496081694461 0.8891152295138269 0.2486235935674372 0.9360869748995810  
0.0919244902957459 0.6595761022521529 0.9231616487896801 0.9189319828895393 0.7498565059716285 0.8449276735935740  
0.1208415043811897 0.6544689189192425 0.7333076641296614 0.6893475349963509 0.7499487378782845 0.8528494395984652  
0.2481674399469114 0.6610453987026972 0.7596509128836004 0.7910742072056038 0.7541438694929496 0.4486810013424929  
0.3086184391692299 0.5481805470655132 0.7843130529235651 0.6031662597612453 0.7525197290146934 0.4402290423776591  
0.0730952784418193 0.5503384809035339 0.8231738630786865 0.6971074236428692 0.7488047792253596 0.6272429103192465  
0.4188181516906653 0.3715203899219048 0.5965976429058628 0.7731410537928554 0.6716934657128206 0.4683215511904777  
0.4092803797783020 0.5012865522030694 0.5852893762030149 0.6220963807699889 0.4380957571124355 0.4642188646440673  
0.4031577851879717 0.6309203562259071 0.5763890779963106 0.2746228888639806 0.6721503861920510 0.0260583949715709  
0.1859271432767713 0.3721646043027249 0.6103763411589185 0.3048021958210683 0.1755144025470088 0.1739882715266958  
0.1918661527845984 0.5019381953863800 0.5988525498478268 0.4232205475411916 0.1741819137882175 0.1750561893276270  
0.1995990944966124 0.6316900115128306 0.5838862948394024 0.3469378789693778 0.6585470409986485 0.1658126665142916  
0.9912448337264408 0.4518240062617522 0.7909878501982561 0.6565755325972731 0.4254124241147395 0.6253763960892158  
0.9996855036692125 0.6551179863793237 0.7889909433959232 0.9723322083262858 0.7070144534595784 0.3467425049592450  
0.1254480895354178 0.5584481964315771 0.2592996944636141 0.9033918709374618 0.7377329470421330 0.4219401345561380  
0.1906271824971242 0.5603009497414675 0.4256915035147983 0.0117260056824122 0.6415805872179376 0.4877005731979267  
0.2995297894277087 0.5574945904571322 0.5300145375968981 0.9414343134769680 0.6701073590682753 0.5619752532026254  
0.4026213926284683 0.5624129479712323 0.4145409591031282 0.6687843950066821 0.7105491799565797 0.6239821327190782  
0.3815629796076436 0.5408304745181383 0.2270015253574371 0.6664454780600408 0.7851283034382490 0.6308208834998439  
0.2543169590489640 0.5508452573485627 0.2594856194875490 0.9466319532595904 0.7071809307457428 0.4164007800719105  
0.1250919160154211 0.3420781413125411 0.2635804935292185 0.9677310382682833 0.6710561360623899 0.4927798480894694
